# Supplementary material for: Network medicine framework identified drug-repurposing opportunities of pharmaco-active compounds of Angelica acutiloba (Siebold & Zucc.) Kitag. for skin aging
Source: Aging (Albany NY). 2023 Jun 12;15(11):5144–63. doi: 10.18632/aging.204789 (PMC10292898; doi:10.18632/aging.204789)
Supplement: Supplementary Table 1 [file aging-15-204789-s001.xlsx]

## Sheet: Sheet1
Supplementary Table 1. Protein interactions of human protein-protein interactome.
Entrez Gene Interactor A	Entrez Gene Interactor B
1	368
1	10549
1	80854
1	10422
1	63891
1	284403
1	9923
1	56888
1	23352
1	23198
1	2232
1	284161
1	310
1	6622
1	1026
1	2886
1	6606
1	10321
2	9510
2	5047
2	3952
2	3931
2	4803
2	348
2	3586
2	3565
2	351
2	4846
2	22976
2	24138
2	126003
2	140545
2	84106
2	2193
2	3437
2	10724
2	6009
2	7001
2	51295
2	1995
2	51013
2	2639
2	9361
2	1558
2	1562
2	5886
2	10053
2	126074
2	11140
2	3337
2	115704
2	54850
2	6468
2	5864
2	56729
2	57559
2	23154
2	7372
2	64223
2	60
2	476
2	112398
2	2026
2	51024
2	93185
2	10376
2	7301
2	7052
2	145864
2	79695
2	55033
2	655
2	4016
2	79006
2	64146
2	285203
2	55118
2	284207
2	56983
2	84279
2	1990
2	259
2	354
2	4313
2	1080
2	1022
2	5597
2	204851
2	284161
2	64419
2	728642
2	7276
2	1437
2	7083
2	6285
2	4067
2	3221
2	3015
2	7295
2	3014
2	310
2	5295
2	7003
2	3163
2	1499
2	1026
2	4332
2	6850
2	2669
2	23682
2	386675
2	998
2	5908
2	2885
2	163
2	8350
2	7050
2	8848
2	6606
2	9922
2	56957
2	58489
2	283150
2	55729
2	23191
2	353324
2	140691
2	337879
2	415117
2	167465
2	84708
2	84709
2	55845
2	117581
2	9976
2	23176
2	7353
2	8764
2	10524
2	65082
2	138065
2	55611
2	11315
2	10813
2	116092
2	57054
2	51699
2	11218
2	93974
2	8322
2	7732
2	10273
2	8533
2	26468
2	3170
2	22983
2	93621
2	3309
2	10944
2	6774
2	81792
2	567
2	4035
2	124912
2	1361
2	11173
2	26085
2	16735
3	3913
3	4221
3	5201
3	4927
3	6592
3	11309
3	12808
9	3383
9	328
10	351
10	56910
10	23567
10	25818
10	5888
10	3006
10	5725
10	999
10	7490
10	324
10	1029
10	1031
10	472
10	6794
10	79728
10	51343
12	30834
12	354
12	1511
12	1991
12	3817
12	1990
12	11330
12	2244
12	5004
12	2638
12	7018
12	3263
12	6779
12	1191
12	3933
12	3043
12	11272
12	284161
12	80262
12	11269
12	351
12	3920
12	4790
12	4001
12	839
12	6444
12	65082
12	51699
12	10273
12	51100
12	10319
12	4035
12	64215
12	26085
13	10513
14	1725
14	3297
14	27250
14	10226
14	6726
14	6293
14	8553
14	64782
14	6134
14	23405
14	65125
14	55844
14	10076
14	427
14	59272
14	22980
14	51763
14	55216
14	83449
14	27249
14	4289
14	81631
14	51497
14	65265
14	256297
15	4188
15	8553
15	337879
15	317649
15	7534
15	253
15	7091
15	175
16	7317
16	3376
16	2617
16	4677
16	51520
16	1615
16	10056
16	5859
16	27101
16	54878
16	91039
16	29904
16	9775
16	60491
16	6726
16	7163
16	7165
16	7453
16	4436
16	51068
16	2923
16	51119
16	6772
16	6777
16	59
16	5879
16	3297
16	54888
16	330
16	9928
16	5529
16	1033
16	25962
16	57019
16	57037
16	92421
16	9212
16	10367
16	10055
16	4234
16	51194
16	1646
16	7412
16	2335
17	32
17	1451
17	3261
17	3262
17	4221
17	5125
17	7149
17	2784
17	5930
17	9811
18	158
18	231
18	875
18	2023
18	2098
18	2184
18	81889
18	2821
18	51171
18	3336
18	10015
18	5236
18	55276
18	5860
18	5887
18	6652
18	10594
18	9117
18	92483
18	1073
18	9615
18	13953
19	8772
19	335
19	6645
19	7360
19	6390
19	316
19	10594
19	9146
19	10987
19	23673
19	10211
19	998
19	10558
19	7052
19	8517
19	7376
19	7316
19	9318
19	196294
19	9826
19	1740
19	64130
19	7402
19	1459
19	7508
19	6640
19	6641
19	26154
19	1387
19	1741
19	23365
19	25814
19	3832
19	2316
19	1756
19	821
19	253
19	3307
19	2605
20	55755
20	51669
20	498
20	57231
20	51251
20	118987
20	515
20	5826
20	109
20	8799
20	93183
20	2261
20	200933
20	2983
20	54940
20	55741
20	55500
20	6560
20	10712
20	223082
20	23457
20	54879
20	821
20	489
20	150771
20	165904
20	506
20	202052
20	23077
20	55069
20	54949
20	23131
20	2281
20	15951
20	6532
20	43
20	6013
20	3307
20	2605
20	5088
21	1577
21	7521
21	3463
22	2235
22	351
22	124995
22	51382
22	10016
22	4712
22	7384
22	23787
22	2058
22	6184
22	57017
22	1431
22	9512
22	9617
22	26995
22	1158
22	1152
22	8531
22	38
22	328
22	4144
22	9361
22	4191
22	10128
22	10102
22	4528
22	7284
22	5862
22	6742
22	708
22	23203
22	549
22	23770
22	6834
22	25962
22	1355
22	84376
22	90550
22	9238
22	63933
22	85476
22	51150
22	51204
22	55028
22	54968
22	84681
22	60492
22	92014
22	91574
22	26164
22	64745
22	28976
22	56949
22	55013
22	54940
22	51250
22	54516
22	65003
22	23788
23	351
23	1660
23	1781
23	10949
23	3181
23	4670
23	3192
23	10643
23	3608
23	4133
23	4361
23	4836
23	5705
23	5706
23	5719
23	5713
23	5714
23	5725
23	6157
23	79718
23	100132992
23	25920
23	1653
23	10987
23	8345
23	92421
23	1894
23	8891
23	1616
23	27292
23	51637
23	22981
23	51493
23	23322
23	8491
24	1258
24	22913
25	5777
25	5925
25	672
25	613
25	16451
25	5295
25	10152
25	12912
25	27
25	5888
25	472
25	1385
25	1399
25	3716
25	2876
25	847
25	10006
25	7157
25	3636
25	6464
25	5591
25	7161
25	5989
25	5883
25	7013
25	3055
25	2885
25	1796
25	7409
25	4193
25	2475
25	84287
25	6708
25	6709
25	51466
25	4739
25	8470
25	7275
25	2887
25	23429
25	55824
25	867
25	4914
25	5335
25	9564
25	64780
25	56961
25	126669
25	4690
25	2048
25	2042
25	6714
25	8202
25	11073
25	3320
25	3308
25	4792
25	5071
25	6789
25	545
25	573
25	5111
25	5688
25	5685
25	56897
25	10580
25	10075
25	4194
25	13194
25	5296
25	1173
25	84959
25	2060
25	1398
25	163
25	55589
25	85021
25	85439
25	868
25	160
25	4137
25	5203
25	5144
25	5052
25	1956
25	2064
25	2065
25	2066
25	8936
25	4582
25	9046
25	1027
25	10728
25	3329
25	1499
25	7874
25	26524
25	6700
25	842
25	7532
25	7529
25	7531
25	7534
25	7533
25	10971
25	10413
25	3725
25	2353
25	894
25	50937
25	50938
25	4155
25	9043
25	4439
25	17687
25	57506
25	2889
25	5590
25	598
25	10970
25	1655
25	4733
25	1937
25	83939
25	2130
25	2521
25	4670
25	3336
25	3609
25	55379
25	6167
25	6176
25	6227
25	10923
25	2547
25	6461
25	51520
25	80018
25	4677
25	10298
25	5495
25	28996
25	10278
25	695
25	2534
25	23607
25	5782
25	1795
25	3717
25	92591
25	6655
25	26469
25	65268
25	56995
25	9744
25	2318
25	2533
25	51517
25	1785
25	284086
25	5775
25	4007
25	11184
25	4854
25	1271
25	114879
25	23114
25	1759
25	79705
25	25962
25	51507
25	10273
25	2335
25	197
25	3073
25	6667
25	3326
25	367
25	3815
25	7441
25	729
25	2799
25	4969
25	831
25	2316
25	5077
25	5424
25	996
25	3224
25	887
25	656
25	7112
25	7080
25	4288
25	4734
25	2703
25	1058
25	3980
25	987
25	675
25	1946
25	8529
25	10557
25	8506
25	5310
25	4036
25	5530
25	2295
25	29
25	9472
25	64714
25	4998
25	9610
25	9793
25	4053
25	9820
25	9784
25	3881
25	10262
25	114784
25	22999
25	26960
25	127933
25	79890
25	25920
25	2971
25	1775
25	1748
25	90990
25	91179
25	4253
25	23327
25	23230
25	2571
25	5027
25	83541
25	80831
25	57716
25	170825
25	80852
25	128853
25	8646
25	79723
25	56658
25	64111
25	56955
25	57142
25	55321
25	1951
25	57190
25	2550
25	9569
25	11176
25	60385
25	51428
25	27120
25	610
25	27154
25	50807
25	9757
25	29934
25	56141
25	9908
25	26052
25	22839
25	23136
25	10021
25	29886
25	11250
25	9054
25	23616
25	2810
25	857
25	351
25	3689
25	983
25	7316
25	7150
25	653361
25	5770
25	5921
25	2962
25	6622
25	7535
25	5901
25	58
25	6764
25	5580
25	6654
25	5062
25	1642
25	81857
25	139716
25	91746
25	11315
25	81928
25	6549
25	83660
25	9051
25	5359
25	2099
25	2010
25	118788
25	5587
25	10399
25	8626
25	5893
25	3927
25	7454
25	2074
25	5163
25	2017
25	5159
25	930
25	6091
25	4233
25	4638
25	3958
25	10725
25	301
25	1051
26	8454
26	7073
26	9802
26	348093
26	23126
26	337879
26	220002
26	55093
26	84872
26	1778
26	8928
26	30012
27	25
27	847
27	8470
27	5688
27	2066
27	81545
27	3055
27	7164
27	84419
27	11339
27	2876
27	9322
27	1398
27	2885
27	9610
27	417553
27	3265
27	4193
27	8503
27	2534
27	6714
27	4294
27	5295
27	2065
27	25962
27	23299
27	636
27	9529
27	4734
27	11140
27	84460
27	23327
27	10152
27	1956
27	2017
27	10006
27	26469
27	57091
27	8832
27	6774
27	4690
27	3141
27	10572
27	4137
27	867
27	3958
27	1051
28	65983
28	84283
29	351
29	25
29	25962
29	9702
29	79959
29	9212
29	11190
30	25921
30	126003
30	7419
30	51061
30	5191
30	10797
30	1964
30	83696
30	441150
30	5830
30	847
30	51755
30	6342
30	5479
30	6223
30	3295
30	84324
30	10262
30	57794
30	116540
30	196294
30	83943
30	51119
30	58477
30	7024
30	55527
31	1114
31	672
31	54821
31	5695
31	55671
31	5708
31	5562
31	6788
31	3611
31	6195
31	55827
31	25962
31	79577
31	9646
31	84376
31	54623
31	84959
31	200879
31	1173
31	636
31	137868
31	56922
31	6457
31	55781
31	79025
31	128866
31	2036
31	64087
31	51361
31	51164
31	10762
31	57414
31	2259
31	1646
32	26589
32	3423
32	131890
32	31
32	58526
32	5562
32	2932
32	2931
32	30
32	6867
32	23243
32	3159
32	25962
32	84376
32	3141
32	1646
32	3261
32	3262
32	16446
32	9811
32	4484
33	127833
33	339967
33	10111
34	11171
34	476
34	509
34	523
34	55832
34	821
34	1650
34	7919
34	2108
34	2673
34	9945
34	26275
34	3419
34	5519
34	5589
34	5701
34	6184
34	8803
34	7385
34	7416
34	7417
34	7184
34	378
34	5518
34	3301
34	4191
34	10128
34	10102
34	5862
34	375
34	381
34	5250
34	9493
34	6742
34	8452
34	2582
34	9928
34	8192
34	84553
34	373509
34	25953
34	10693
34	63933
34	9212
34	8801
34	83943
34	64949
34	91574
34	26164
34	64745
34	28976
34	54443
34	9524
34	51250
34	10157
34	54516
34	11231
34	10868
34	9054
34	2109
34	1646
34	13784
34	15598
34	8669
35	3665
35	25932
35	1800
35	22929
35	9117
35	23092
36	54915
36	10121
36	2531
36	708
36	8192
36	23322
36	26123
36	57187
36	85302
36	57096
36	196294
36	83943
36	55486
36	10279
36	27034
36	2476
37	10632
37	55756
37	3921
37	10243
37	324
37	10901
37	9493
37	23203
37	9793
37	9928
37	6834
37	339229
37	79922
37	26275
37	63933
37	92421
37	79736
37	83943
37	51295
37	54968
37	92014
37	27068
37	64745
37	1894
37	54443
37	51250
37	54516
37	9014
37	9021
38	10449
38	11073
38	100128525
38	157378
38	10469
38	54543
38	8266
38	8458
38	1434
38	9898
38	189
38	22
38	1396
38	1642
38	1738
38	56931
38	2068
38	10994
38	94081
38	81855
38	10280
38	7386
38	57107
38	5725
38	6389
38	2521
38	9361
38	4191
38	10128
38	10102
38	4528
38	7284
38	483
38	4141
38	1915
38	54205
38	7019
38	2130
38	6742
38	708
38	2305
38	1429
38	23203
38	2926
38	330
38	8454
38	8452
38	549
38	3396
38	9928
38	6294
38	9912
38	167127
38	27237
38	25962
38	285367
38	414919
38	158763
38	60493
38	56339
38	83478
38	10044
38	81704
38	10985
38	10987
38	9238
38	63933
38	84881
38	92399
38	81554
38	85476
38	50
38	51204
38	55028
38	54968
38	39
38	84681
38	64949
38	81892
38	60492
38	219402
38	91574
38	81027
38	26164
38	64745
38	28976
38	55218
38	55013
38	22868
38	51250
38	54516
38	65003
38	7412
39	7408
39	125488
39	191
39	9061
39	84708
39	38
39	22878
39	3033
39	3336
39	5093
39	5094
39	5203
39	133619
39	7332
39	51035
39	29101
39	29789
39	29968
39	51741
40	9311
40	18693
40	7095
40	5337
40	10788
40	3032
40	55711
40	5338
40	9463
41	9463
41	40
41	55325
41	3163
41	8795
41	11000
41	26123
41	4258
41	115653
43	1282
43	8292
43	10399
44	5500
47	351
47	10916
47	4171
47	4175
47	4691
47	23352
47	22933
47	1431
47	3190
47	93100
47	91181
47	6120
47	6389
47	6390
47	10963
47	4287
47	57122
47	4149
47	9493
47	330
47	8453
47	8452
47	9641
47	7029
47	9928
47	5587
47	55200
47	285193
47	120892
47	25962
47	55832
47	55294
47	83746
47	92421
47	3276
47	51593
47	1894
47	25814
47	5564
47	4831
47	2932
47	7706
47	8850
47	1646
48	26234
48	351
48	113246
48	1503
48	8335
48	8624
48	84817
48	2632
48	8880
48	28960
48	11171
48	5829
48	1213
48	4604
48	6445
48	4703
49	7784
50	351
50	50808
50	38
50	25942
50	10449
50	7915
50	226
50	230
50	481
50	515
50	522
50	2098
50	2819
50	23171
50	2820
50	23760
50	9218
50	23071
50	23081
50	56892
50	2821
50	7412
51	4074
51	23022
51	54732
51	6182
51	1632
51	1340
51	9380
51	847
51	23636
51	23398
51	10150
51	339977
51	9240
51	54443
51	11269
51	8912
52	51460
52	55052
52	54874
52	1969
52	6136
52	58527
52	5093
52	5306
52	53938
52	6888
52	60
52	345651
52	445582
52	7086
52	158
52	4144
52	4171
52	5728
52	10549
52	10130
52	81567
52	10987
52	3276
52	84076
52	56981
52	10133
52	3643
52	2048
52	3791
52	7535
52	2047
52	7412
53	7386
53	1186
53	2531
53	80207
53	115992
53	57827
53	55905
53	153364
53	54862
53	3958
53	4074
53	7201
53	54329
53	10712
53	5339
53	6442
53	23673
53	1902
53	60491
53	64805
53	51726
53	10490
53	1822
53	5058
53	5653
53	9846
54	54978
54	3309
54	80311
54	25792
54	51478
54	6118
54	5601
54	8743
54	5516
54	7704
54	9410
54	16176
54	11745
54	12823
54	18293
54	57
54	6445
55	563
55	811
55	821
55	2923
55	1650
55	2475
55	10128
55	3703
55	3998
55	1434
55	7415
55	29927
55	6407
55	22915
55	23193
55	23420
55	11000
55	54901
55	54836
55	25923
55	9689
55	23041
55	26090
55	23065
55	337867
55	57650
55	201595
55	23225
55	51337
55	10985
55	7353
55	3842
55	57655
55	23197
55	81929
55	79188
55	2177
55	57510
55	55215
55	54814
55	56886
55	51726
55	11231
55	11269
55	23341
55	23534
55	18521
56	5538
56	161742
56	493856
56	7248
56	80025
56	16176
56	6311
58	7205
58	838633
58	6198
58	4892
58	2638
58	9087
58	7114
58	10575
58	9468
58	22948
58	1756
58	55869
58	1660
58	9759
58	1072
58	1773
58	22885
58	84448
58	84172
58	345651
58	55845
58	1029
58	10787
58	154796
58	25
58	4641
58	7429
58	2934
58	7408
58	7170
58	5502
58	8454
58	11144
58	9702
58	399687
58	84859
58	51474
58	388324
58	121549
58	400566
58	84676
58	114824
58	26001
58	81493
58	815
58	653145
58	6708
58	5216
58	10576
58	5581
58	23406
58	9643
58	1432
58	6624
58	51086
58	137735
58	54961
58	54434
58	10524
58	142678
58	23214
58	84687
58	79083
58	221692
58	55929
58	10933
58	26136
58	29761
58	27252
58	85477
59	10575
59	9468
59	22948
59	4627
59	4629
59	4736
59	6141
59	6228
59	9045
59	6130
59	6210
59	6139
59	6217
59	6231
59	6191
59	4628
59	70
59	4641
59	7168
59	57129
59	16
59	6624
59	51271
59	7791
59	51116
59	51081
59	2950
59	6709
59	1265
59	239
59	60
59	58
59	9349
59	4216
59	345651
59	797
59	440915
59	10487
59	10486
59	2934
59	5502
59	8454
59	8453
59	8452
59	8450
59	1718
59	51270
59	79664
59	79960
59	55832
59	9240
59	142679
59	79983
59	23190
59	10987
59	57215
59	92400
59	84290
59	78992
59	440738
59	55825
59	64393
59	51806
59	120892
59	7273
59	114088
60	1072
60	1073
60	11034
60	71
60	83988
60	12465
60	12469
60	15511
60	653361
60	5879
60	5880
60	9468
60	22948
60	10576
60	54434
60	85464
60	2099
60	10096
60	10097
60	3161
60	1490
60	5430
60	6882
60	3192
60	1660
60	6622
60	6530
60	8439
60	8607
60	10856
60	4629
60	23603
60	5499
60	29109
60	26146
60	2064
60	84172
60	55611
60	4846
60	3383
60	975
60	7412
60	3385
60	5216
60	857
60	2033
60	1460
60	10657
60	254427
60	4736
60	23406
60	154796
60	1962
60	10486
60	55093
60	8850
60	790
60	1915
60	1917
60	8565
60	21454
60	12461
60	653269
60	70
60	345651
60	440915
60	2934
60	10487
60	85477
60	56907
60	55975
60	23242
60	4430
60	9703
60	4216
60	84501
60	6282
60	10095
60	89
60	5862
60	64854
60	5500
60	2885
60	7534
60	6047
60	7082
60	3959
60	91624
60	10131
60	8500
60	8454
60	8453
60	8452
60	9589
60	9657
60	5108
60	4738
60	1627
60	25962
60	55676
60	56257
60	10980
60	56339
60	55832
60	9456
60	11346
60	9240
60	121441
60	84959
60	142679
60	9274
60	134492
60	4008
60	399687
60	2100
60	10987
60	10524
60	8065
60	6605
60	57591
60	115106
60	1173
60	10426
60	57175
60	10844
60	11190
60	57721
60	29766
60	10013
60	51474
60	1837
60	7329
60	598
60	7965
60	3184
60	23054
60	11140
60	6606
60	55729
60	84193
60	24142
60	65057
60	26277
60	25913
60	51699
60	10627
60	5245
60	7419
60	7416
60	3921
60	2597
60	7417
60	3178
60	3312
60	203068
60	7431
60	498
60	3329
60	309
60	3320
60	8460
60	8508
60	6613
60	3017
60	7341
60	4130
60	4170
60	4607
60	9643
60	120892
60	7846
60	10498
60	6601
60	26578
60	23623
60	192669
60	192670
60	55929
60	51807
60	10933
60	54617
60	10458
60	26260
60	5340
60	8507
60	6118
60	6119
60	6117
62	17456
64	9071
70	23224
70	10015
70	11275
70	7168
70	4628
70	53335
70	2638
70	58
70	10556
70	2969
70	10576
70	10409
70	6143
70	57198
70	1213
70	7307
70	6711
70	6418
70	10487
70	9493
70	667
70	1477
70	9295
70	800
70	56907
70	29894
70	9897
70	5756
70	6598
70	10946
70	7158
70	2059
70	6881
70	1891
70	22925
70	2314
70	3550
70	7965
70	1662
70	10155
70	9112
70	4999
70	6949
70	10992
70	10540
70	22938
70	3918
70	6709
70	7919
70	8621
70	3184
70	23649
70	1809
70	1639
70	1778
70	8581
70	2017
70	5357
70	9656
70	2804
70	1108
70	3837
70	9221
70	4926
70	26130
70	9589
70	9733
70	9928
70	10130
70	5339
70	5464
70	10728
70	23450
70	1266
70	10262
70	8175
70	10291
70	6760
70	7536
70	5469
70	7791
70	989
70	5931
70	11052
70	1627
70	64423
70	55234
70	9208
70	51574
70	605
70	22837
70	345651
70	23033
70	55183
70	23248
70	56254
70	24149
70	57631
70	387680
70	196528
70	25962
70	11344
70	55596
70	55681
70	6604
70	23164
70	9625
70	10847
70	57482
70	65059
70	9879
70	56257
70	23191
70	51780
70	197358
70	84844
70	84717
70	359948
70	5930
70	348110
70	641371
70	8106
70	56339
70	7798
70	340547
70	54815
70	89869
70	10620
70	10523
70	57794
70	79665
70	150468
70	10250
70	26009
70	65979
70	10006
70	259266
70	23360
70	79869
70	55740
70	26135
70	259282
70	57492
70	130075
70	6601
70	84085
70	91754
70	84153
70	25957
70	147179
70	85313
70	58509
70	9274
70	123169
70	55466
70	4008
70	26121
70	55269
70	57459
70	25909
70	1653
70	8971
70	10693
70	23168
70	23469
70	5546
70	8193
70	8110
70	5977
70	10521
70	27238
70	6599
70	6603
70	8570
70	7874
70	6605
70	57591
70	8880
70	55761
70	57456
70	221504
70	9410
70	54908
70	55049
70	155435
70	26999
70	90324
70	9212
70	6602
70	91937
70	84991
70	85235
70	51663
70	57634
70	55599
70	85440
70	153527
70	114823
70	54517
70	9585
70	221613
70	23152
70	56897
70	1265
70	988
70	5204
70	11315
[truncated: 749,941+ more rows]
