# Supplementary material for: Network medicine framework identified drug-repurposing opportunities of pharmaco-active compounds of Angelica acutiloba (Siebold & Zucc.) Kitag. for skin aging
Source: Aging (Albany NY). 2023 Jun 12;15(11):5144–63. doi: 10.18632/aging.204789 (PMC10292898; doi:10.18632/aging.204789)
Supplement: Supplementary Table 2 [file aging-15-204789-s002.xlsx]

## Sheet: Sheet1
Supplementary Table 2. 29 AAK compounds with associated target proteins.
chemical	pubchem_compound_id	entrez_id	symbol
1-Phenyl-1,2-propanedione	11363	316	AOX1
1-Phenyl-1,2-propanedione	11363	7498	XDH
1-Phenyl-1,2-propanedione	11363	29968	PSAT1
1-Phenyl-1,2-propanedione	11363	30	ACAA1
5-Hydroxymethylfurfural	237332	3043	HBB
5-Hydroxymethylfurfural	237332	3040	HBA2
5-Hydroxymethylfurfural	237332	6817	SULT1A1
5-Hydroxymethylfurfural	237332	6799	SULT1A2
5-Hydroxymethylfurfural	237332	6389	SDHA
8,11,14-Eicosatrienoic Acid	5280581	5743	PTGS2
8,11,14-Eicosatrienoic Acid	5280581	5742	PTGS1
9,11-Octadecadienoic acid	5282796	1962	EHHADH
9,11-Octadecadienoic acid	5282796	3030	HADHA
9,11-Octadecadienoic acid	5282796	79071	ELOVL6
alpha-pinene	440968	222662	LHFPL5
alpha-pinene	440968	2804	GOLGB1
alpha-pinene	440968	9350	CER1
Apigenin	5280443	6677	SPAM1
Apigenin	5280443	2100	ESR2
Apigenin	5280443	7422	VEGFA
Apigenin	5280443	4318	MMP9
Apigenin	5280443	595	CCND1
Apigenin	5280443	1588	CYP19A1
Apigenin	5280443	1994	ELAVL1
Apigenin	5280443	3091	HIF1A
Apigenin	5280443	847	CAT
Apigenin	5280443	8795	TNFRSF10B
Apigenin	5280443	1457	CSNK2A1
Apigenin	5280443	5243	ABCB1
Apigenin	5280443	1543	CYP1A1
Apigenin	5280443	1544	CYP1A2
Apigenin	5280443	6876	TAGLN
Apigenin	5280443	4129	MAOB
Apigenin	5280443	952	CD38
Apigenin	5280443	6513	SLC2A1
Apigenin	5280443	2571	GAD1
Apigenin	5280443	7852	CXCR4
Apigenin	5280443	80351	TNKS2
Apigenin	5280443	2308	FOXO1
Apigenin	5280443	7421	VDR
Apigenin	5280443	5781	PTPN11
Apigenin	5280443	51053	GMNN
Apigenin	5280443	6714	SRC
Apigenin	5280443	5747	PTK2
Apigenin	5280443	54578	UGT1A6
Apigenin	5280443	558	AXL
Apigenin	5280443	1950	EGF
Apigenin	5280443	5443	POMC
Apigenin	5280443	355	FAS
Apigenin	5280443	5595	MAPK3
Apigenin	5280443	841	CASP8
Apigenin	5280443	842	CASP9
Apigenin	5280443	4363	ABCC1
Apigenin	5280443	1080	CFTR
Apigenin	5280443	54577	UGT1A7
Apigenin	5280443	596	BCL2
Apigenin	5280443	5594	MAPK1
Apigenin	5280443	1576	CYP3A4
Apigenin	5280443	3551	IKBKB
Apigenin	5280443	840	CASP7
Apigenin	5280443	54600	UGT1A9
Apigenin	5280443	54576	UGT1A8
Apigenin	5280443	330	BIRC3
Apigenin	5280443	6817	SULT1A1
Apigenin	5280443	7366	UGT2B15
Apigenin	5280443	54575	UGT1A10
Apigenin	5280443	8856	NR1I2
Apigenin	5280443	2099	ESR1
Apigenin	5280443	983	CDK1
Apigenin	5280443	836	CASP3
Apigenin	5280443	142	PARP1
Apigenin	5280443	54658	UGT1A1
Apigenin	5280443	5743	PTGS2
Apigenin	5280443	207	AKT1
Apigenin	5280443	1545	CYP1B1
Apigenin	5280443	7157	TP53
Apigenin	5280443	4128	MAOA
camphene	6616	9370	ADIPOQ
cyclohexane	13006	5644	PRSS1
cyclohexane	13006	2147	F2
cyclohexane	13006	4953	ODC1
cyclohexane	13006	4986	OPRK1
cyclohexane	13006	5646	PRSS3
cyclohexane	13006	4988	OPRM1
cyclohexane	13006	9407	TMPRSS11D
cyclohexane	13006	284366	KLK9
Cyclohexane	13006	34	ACADM
Cyclohexane	13006	2747	GLUD2
Cyclohexane	13006	2746	GLUD1
Cyclohexane	13006	32	ACACB
Decursin	442126	4318	MMP9
Decursin	442126	1499	CTNNB1
Decursin	442126	285	ANGPT2
Decursin	442126	367	AR
Decursin	442126	142	PARP1
Decursin	442126	354	KLK3
Diosmin	5281613	1543	CYP1A1
Diosmin	5281613	196	AHR
Ferulic acid	445858	54205	CYCS
Ferulic acid	445858	405754	ERVFRD-1
Ferulic acid	445858	2921	CXCL3
Ferulic acid	445858	2920	CXCL2
Ferulic acid	445858	2919	CXCL1
Ferulic acid	445858	161291	TMEM30B
Ferulic acid	445858	55754	TMEM30A
Ferulic acid	445858	30816	ERVW-1
Ferulic acid	445858	644444	TMEM30CP
Folic acid	135398658	7157	TP53
Folic acid	135398658	4548	MTR
Folic acid	135398658	6347	CCL2
Folic acid	135398658	5465	PPARA
Folic acid	135398658	3486	IGFBP3
Folic acid	135398658	10840	ALDH1L1
Folic acid	135398658	4552	MTRR
Folic acid	135398658	627	BDNF
Folic acid	135398658	52	ACP1
Folic acid	135398658	25902	MTHFD1L
Folic acid	135398658	9	NAT1
Folic acid	135398658	8560	DEGS1
Folic acid	135398658	6470	SHMT1
Folic acid	135398658	10841	FTCD
Folic acid	135398658	142	PARP1
Folic acid	135398658	6948	TCN2
Folic acid	135398658	6472	SHMT2
Folic acid	135398658	2356	FPGS
Folic acid	135398658	8836	GGH
Folic acid	135398658	875	CBS
Folic acid	135398658	1401	CRP
Folic acid	135398658	80704	SLC19A3
Folic acid	135398658	2346	FOLH1
Folic acid	135398658	5198	PFAS
Folic acid	135398658	118924	FRA10AC1
Folic acid	135398658	10588	MTHFS
Folic acid	135398658	867	CBL
Folic acid	135398658	9429	ABCG2
Folic acid	135398658	7018	TF
Folic acid	135398658	213	ALB
Folic acid	135398658	29958	DMGDH
Folic acid	135398658	81034	SLC25A32
Folic acid	135398658	348	APOE
Folic acid	135398658	635	BHMT
Folic acid	135398658	7037	TFRC
Folic acid	135398658	1757	SARDH
Folic acid	135398658	5580	PRKCD
Folic acid	135398658	5860	QDPR
Folic acid	135398658	1666	DECR1
Folic acid	135398658	10400	PEMT
Folic acid	135398658	23531	MMD
Folic acid	135398658	113235	SLC46A1
Folic acid	135398658	4522	MTHFD1
Folic acid	135398658	1719	DHFR
Folic acid	135398658	4524	MTHFR
Folic acid	135398658	7298	TYMS
Folic acid	135398658	4846	NOS3
Folic acid	135398658	1786	DNMT1
Folic acid	135398658	5054	SERPINE1
Folic acid	135398658	330	BIRC3
Folic acid	135398658	388585	HES5
Folic acid	135398658	2618	GART
Folic acid	135398658	6573	SLC19A1
Folic acid	135398658	2352	FOLR3
Folic acid	135398658	2350	FOLR2
Folic acid	135398658	2348	FOLR1
folinic acid	135403648	2356	FPGS
folinic acid	135403648	6573	SLC19A1
folinic acid	135403648	2348	FOLR1
folinic acid	135403648	6948	TCN2
folinic acid	135403648	5860	QDPR
folinic acid	135403648	2350	FOLR2
Folinic acid	135403648	10588	MTHFS
Folinic acid	135403648	1719	DHFR
Folinic acid	135403648	100528021	ST20-MTHFS
Folinic acid	135403648	275	AMT
Folinic acid	135403648	7298	TYMS
Folinic acid	135403648	10841	FTCD
Folinic acid	135403648	4524	MTHFR
Folinic acid	135403648	113235	SLC46A1
Folinic acid	135403648	9376	SLC22A8
Folinic acid	135403648	9356	SLC22A6
Furfural	7362	3043	HBB
Furfural	7362	3040	HBA2
Furfural	7362	218	ALDH3A1
Furfural	7362	1666	DECR1
Furfural	7362	224	ALDH3A2
Furfural	7362	2539	G6PD
Furfuryl alcohol	7361	7532	YWHAG
Furfuryl alcohol	7361	6839	SUV39H1
Furfuryl alcohol	7361	79723	SUV39H2
Gallic acid	370	6817	SULT1A1
Gallic acid	370	207	AKT1
Gallic acid	370	4318	MMP9
Gallic acid	370	338	APOB
Gallic acid	370	5578	PRKCA
Gallic acid	370	840	CASP7
Gallic acid	370	388	RHOB
Gallic acid	370	1147	CHUK
Gallic acid	370	4353	MPO
Gallic acid	370	847	CAT
Gallic acid	370	1009	CDH11
Gallic acid	370	4313	MMP2
Gallic acid	370	7299	TYR
Gallic acid	370	472	ATM
Gallic acid	370	5243	ABCB1
Gallic acid	370	3725	JUN
Gallic acid	370	7367	UGT2B17
Gallic acid	370	2625	GATA3
Gallic acid	370	5054	SERPINE1
Gallic acid	370	9451	EIF2AK3
Gallic acid	370	836	CASP3
Hydroquinone	785	7153	TOP2A
Hydroquinone	785	4352	MPL
Hydroquinone	785	7486	WRN
Hydroquinone	785	5594	MAPK1
Hydroquinone	785	142	PARP1
Hydroquinone	785	6688	SPI1
Hydroquinone	785	6648	SOD2
Hydroquinone	785	842	CASP9
Hydroquinone	785	5429	POLH
Hydroquinone	785	840	CASP7
Hydroquinone	785	3569	IL6
Hydroquinone	785	6347	CCL2
Hydroquinone	785	841	CASP8
Hydroquinone	785	4313	MMP2
Hydroquinone	785	8989	TRPA1
Hydroquinone	785	4780	NFE2L2
Hydroquinone	785	836	CASP3
Hydroquinone	785	5595	MAPK3
Hydroquinone	785	7124	TNF
Hydroquinone	785	9429	ABCG2
Hydroquinone	785	342898	SYCN
Hydroquinone	785	1315	COPB1
Hydroquinone	785	84869	CBR4
Hydroquinone	785	10143	CLEC3A
Hydroquinone	785	10462	CLEC10A
Hydroquinone	785	9976	CLEC2B
Hydroquinone	785	9709	HERPUD1
Hydroquinone	785	4519	MT-CYB
Hydroquinone	785	1728	NQO1
Hydroquinone	785	7299	TYR
Hydroquinone	785	847	CAT
Hydroquinone	785	5444	PON1
Hydroquinone	785	5446	PON3
Hydroquinone	785	760	CA2
Hydroquinone	785	5445	PON2
Hydroquinone	785	4353	MPO
Hydroquinone	785	6647	SOD1
Hydroquinone	785	10800	CYSLTR1
indole	798	3620	IDO1
indole	798	388714	FMO6P
indole	798	80020	FOXRED2
indole	798	2329	FMO4
indole	798	2327	FMO2
indole	798	2328	FMO3
indole	798	2326	FMO1
indole	798	2330	FMO5
indole	798	2832	NPBWR2
indole	798	256933	NPB
indole	798	2831	NPBWR1
indole	798	283869	NPW
indole	798	5447	POR
indole	798	1644	DDC
indole	798	27159	CHIA
indole	798	1118	CHIT1
indole	798	847	CAT
indole	798	25939	SAMHD1
indole	798	241	ALOX5AP
indole	798	3356	HTR2A
indole	798	8784	TNFRSF18
indole	798	50943	FOXP3
indole	798	3605	IL17A
indole	798	4842	NOS1
indole	798	4953	ODC1
indole	798	4843	NOS2
indole	798	5310	PKD1
Indole	798	54905	CYP2W1
Indole	798	1553	CYP2A13
Indole	798	2641	GCG
Indole	798	2625	GATA3
Indole	798	3938	LCT
Indole	798	197021	LCTL
Indole	798	152831	KLB
Indole	798	9365	KL
Indole	798	57733	GBA3
isoquercitrin	5280804	1543	CYP1A1
isoquercitrin	5280804	152	ADRA2C
Isoquercitrin	5280804	836	CASP3
Isoquercitrin	5280804	1545	CYP1B1
Isoquercitrin	5280804	57733	GBA3
limonene	22311	1559	CYP2C9
limonene	22311	1557	CYP2C19
limonene	22311	5468	PPARG
limonene	22311	4842	NOS1
limonene	22311	4843	NOS2
limonene	22311	4846	NOS3
limonene	22311	4552	MTRR
limonene	22311	5447	POR
limonene	22311	3652	IPP
m-Cresol	342	723961	INS-IGF2
m-Cresol	342	3630	INS
m-Cresol	342	43	ACHE
m-Cresol	342	6193	RPS5
m-Cresol	342	51081	MRPS7
Methoxsalen	4114	1548	CYP2A6
Methoxsalen	4114	1576	CYP3A4
Methoxsalen	4114	8856	NR1I2
Methoxsalen	4114	5893	RAD52
Methoxsalen	4114	1544	CYP1A2
Methoxsalen	4114	1543	CYP1A1
Methoxsalen	4114	1549	CYP2A7
Methoxsalen	4114	1545	CYP1B1
Methoxsalen	4114	4286	MITF
Methoxsalen	4114	9407	TMPRSS11D
Methoxyphenol	460	1312	COMT
Methoxyphenol	460	760	CA2
Methoxyphenol	460	759	CA1
Methoxyphenol	460	7173	TPO
Methoxyphenol	460	152185	SPICE1
Methoxyphenol	460	847	CAT
Methoxyphenol	460	2936	GSR
Methoxyphenol	460	213	ALB
Osthol	10228	4322	MMP13
Osthol	10228	4792	NFKBIA
Osthol	10228	4313	MMP2
Osthol	10228	4314	MMP3
Osthol	10228	4319	MMP10
Osthol	10228	4312	MMP1
Osthol	10228	64066	MMP27
Osthol	10228	4317	MMP8
Osthol	10228	3082	HGF
Osthol	10228	4318	MMP9
Osthol	10228	7471	WNT1
Osthol	10228	89780	WNT3A
Osthol	10228	836	CASP3
Osthol	10228	4780	NFE2L2
Osthol	10228	632	BGLAP
Osthol	10228	6356	CCL11
Osthol	10228	2147	F2
Osthol	10228	7473	WNT3
Phenol	996	6799	SULT1A2
Phenol	996	6817	SULT1A1
Phenol	996	6818	SULT1A3
Phenol	996	54658	UGT1A1
Phenol	996	10380	BPNT1
Phenol	996	416	ARSF
Phenol	996	22901	ARSG
Phenol	996	153642	ARSK
Phenol	996	414	ARSD
Phenol	996	213	ALB
Protocatechuic acid	72	1312	COMT
Protocatechuic acid	72	191	AHCY
Protocatechuic acid	72	2516	NR5A1
Protocatechuic acid	72	4353	MPO
Protocatechuic acid	72	1806	DPYD
Protocatechuic acid	72	1723	DHODH
Protocatechuic acid	72	190	NR0B1
Protocatechuic acid	72	158	ADSL
Pyrocatechol	289	5319	PLA2G1B
Pyrocatechol	289	6818	SULT1A3
Pyrocatechol	289	836	CASP3
Pyrocatechol	289	4353	MPO
Pyrocatechol	289	8288	EPX
Pyrocatechol	289	840	CASP7
Pyrocatechol	289	841	CASP8
Pyrocatechol	289	6819	SULT1C2
Pyrocatechol	289	3145	HMBS
Pyrocatechol	289	842	CASP9
Pyrocatechol	289	6799	SULT1A2
Pyrocatechol	289	3043	HBB
Pyrocatechol	289	6817	SULT1A1
Pyrocatechol	289	84693	MCEE
Pyrocatechol	289	7173	TPO
Pyrocatechol	289	137902	PXDNL
Pyrocatechol	289	7837	PXDN
Pyrocatechol	289	391013	PLA2G2C
Pyrocatechol	289	1728	NQO1
Pyrocatechol	289	5322	PLA2G5
Pyrocatechol	289	64600	PLA2G2F
Pyrocatechol	289	5320	PLA2G2A
Pyrocatechol	289	8399	PLA2G10
Pyrocatechol	289	26279	PLA2G2D
Pyrocatechol	289	30814	PLA2G2E
Pyrocatechol	289	729330	OC90
Pyrocatechol	289	7054	TH
Pyrocatechol	289	5743	PTGS2
Pyrocatechol	289	1545	CYP1B1
Pyrocatechol	289	5742	PTGS1
Pyrocatechol	289	847	CAT
Pyrocatechol	289	1588	CYP19A1
Pyrocatechol	289	1543	CYP1A1
Pyrocatechol	289	1644	DDC
Pyrocatechol	289	6531	SLC6A3
Pyrocatechol	289	2950	GSTP1
Pyrocatechol	289	2952	GSTT1
Pyrocatechol	289	7299	TYR
Pyrocatechol	289	220074	LRTOMT
Pyrocatechol	289	1312	COMT
Pyrocatechol	289	27294	DHDH
Pyrocatechol	289	3934	LCN2
Pyrocatechol	289	1645	AKR1C1
Pyrocatechol	289	1109	AKR1C4
Pyrocatechol	289	25824	PRDX5
Pyrocatechol	289	4025	LPO
Pyrocatechol	289	2641	GCG
Scopoletin	5280460	7363	UGT2B4
Scopoletin	5280460	7364	UGT2B7
Scopoletin	5280460	847	CAT
Scopoletin	5280460	54600	UGT1A9
Scopoletin	5280460	54578	UGT1A6
Scopoletin	5280460	54658	UGT1A1
Scopoletin	5280460	4286	MITF
Scopoletin	5280460	836	CASP3
Scopoletin	5280460	54659	UGT1A3
Scopoletin	5280460	7366	UGT2B15
Scopoletin	5280460	54577	UGT1A7
Scopoletin	5280460	54576	UGT1A8
Scopoletin	5280460	54575	UGT1A10
stearic acid	5281	5465	PPARA
stearic acid	5281	26279	PLA2G2D
stearic acid	5281	348	APOE
stearic acid	5281	338	APOB
stearic acid	5281	2641	GCG
stearic acid	5281	335	APOA1
stearic acid	5281	11332	ACOT7
stearic acid	5281	3949	LDLR
stearic acid	5281	7804	LRP8
stearic acid	5281	6385	SDC4
stearic acid	5281	9227	LRAT
stearic acid	5281	6383	SDC2
stearic acid	5281	5122	PCSK1
stearic acid	5281	6382	SDC1
stearic acid	5281	6121	RPE65
stearic acid	5281	10965	ACOT2
stearic acid	5281	221914	GPC2
stearic acid	5281	2262	GPC5
stearic acid	5281	122970	ACOT4
stearic acid	5281	4036	LRP2
stearic acid	5281	125981	ACER1
stearic acid	5281	345	APOC3
stearic acid	5281	55331	ACER3
stearic acid	5281	2817	GPC1
stearic acid	5281	2719	GPC3
stearic acid	5281	4035	LRP1
stearic acid	5281	10082	GPC6
stearic acid	5281	641371	ACOT1
stearic acid	5281	4647	MYO7A
stearic acid	5281	375790	AGRN
stearic acid	5281	5947	RBP1
stearic acid	5281	3339	HSPG2
stearic acid	5281	340485	ACER2
stearic acid	5281	9672	SDC3
stearic acid	5281	336	APOA2
stearic acid	5281	2239	GPC4
stearic acid	5281	337	APOA4
stearic acid	5281	79966	SCD5
stearic acid	5281	6319	SCD
stearic acid	5281	213	ALB
stearic acid	5281	3638	INSIG1
stearic acid	5281	2170	FABP3
stearic acid	5281	2167	FABP4
stearic acid	5281	55301	OLAH
stearic acid	5281	5467	PPARD
stearic acid	5281	79777	ACBD4
stearic acid	5281	135	ADORA2A
stearic acid	5281	6648	SOD2
stearic acid	5281	5770	PTPN1
stearic acid	5281	570	BAAT
stearic acid	5281	91452	ACBD5
stearic acid	5281	1311	COMP
stearic acid	5281	6096	RORB
stearic acid	5281	2099	ESR1
stearic acid	5281	5047	PAEP
stearic acid	5281	207	AKT1
stearic acid	5281	6095	RORA
stearic acid	5281	7059	THBS3
stearic acid	5281	7060	THBS4
stearic acid	5281	5970	RELA
stearic acid	5281	6097	RORC
stearic acid	5281	7058	THBS2
stearic acid	5281	7057	THBS1
stearic acid	5281	51586	MED15
stearic acid	5281	3248	HPGD
stearic acid	5281	10715	CERS1
stearic acid	5281	9374	PPT2
stearic acid	5281	5538	PPT1
stearic acid	5281	2629	GBA
stearic acid	5281	4602	MYB
stearic acid	5281	79152	FA2H
stearic acid	5281	5468	PPARG
stearic acid	5281	28976	ACAD9
stearic acid	5281	367	AR
alpha-pinene	440968	1143	CHRNB4
alpha-pinene	440968	4923	NTSR1
alpha-pinene	440968	5641	LGMN
alpha-pinene	440968	1080	CFTR
alpha-pinene	440968	3359	HTR3A
alpha-pinene	440968	6098	ROS
alpha-pinene	440968	1140	CHRNB
alpha-pinene	440968	23186	RCOR1
alpha-pinene	440968	8317	CDC7
alpha-pinene	440968	8564	KMO
alpha-pinene	440968	5478	CYPA
alpha-pinene	440968	4133	MAP2
alpha-pinene	440968	91039	DPP9
alpha-pinene	440968	9536	PTGES
alpha-pinene	440968	4311	MME
alpha-pinene	440968	6275	A4
alpha-pinene	440968	241	ALOX5AP
alpha-pinene	440968	6511	SLC1A6
alpha-pinene	440968	84189	SLITRK6
alpha-pinene	440968	4886	NPY1R
alpha-pinene	440968	6511	SLC1A6
alpha-pinene	440968	132	ADK
alpha-pinene	440968	3676	ITGA4
alpha-pinene	440968	1133	CHRM5
alpha-pinene	440968	6328	SCN3A
alpha-pinene	440968	3320	HSP90A
alpha-pinene	440968	823	CAPN1
alpha-pinene	440968	367	AR
alpha-pinene	440968	8435	SOAT2
alpha-pinene	440968	1017	CDK2
alpha-pinene	440968	7068	THRB
alpha-pinene	440968	134	ADORA1
alpha-pinene	440968	4048	LTA4H
alpha-pinene	440968	8654	PDE5A
alpha-pinene	440968	3293	HSD17B3
alpha-pinene	440968	83933	HDAC10
alpha-pinene	440968	836	CASP3
alpha-pinene	440968	4988	OPRM1
alpha-pinene	440968	3551	IKBKB
alpha-pinene	440968	10000	AKT3
alpha-pinene	440968	1812	DRD1
alpha-pinene	440968	51284	TLR7
alpha-pinene	440968	3269	HRH1
alpha-pinene	440968	1815	DRD4
alpha-pinene	440968	2064	ERBB2
alpha-pinene	440968	11238	CA5B
alpha-pinene	440968	5138	PDE2A
alpha-pinene	440968	5550	PREP
alpha-pinene	440968	10203	CALCRL
alpha-pinene	440968	1268	CNR1
alpha-pinene	440968	2166	FAAH
alpha-pinene	440968	3356	HTR2A
alpha-pinene	440968	6839	SUV39H3
alpha-pinene	440968	834	CASP1
alpha-pinene	440968	4128	MAOA
alpha-pinene	440968	8399	PLA2G10
alpha-pinene	440968	5295	PIK3R1
alpha-pinene	440968	8622	PDE8B
alpha-pinene	440968	3274	HRH2
alpha-pinene	440968	5241	PGR
alpha-pinene	440968	43	ACHE
alpha-pinene	440968	1814	DRD3
alpha-pinene	440968	6916	TBXAS1
alpha-pinene	440968	10733	PLK4
alpha-pinene	440968	4887	NPY2R
alpha-pinene	440968	6865	TACR2
alpha-pinene	440968	7166	TPH1
alpha-pinene	440968	5747	PTK2
alpha-pinene	440968	766	CA7
alpha-pinene	440968	841	CASP8
alpha-pinene	440968	4363	ABCC1
alpha-pinene	440968	7442	TRPV1
alpha-pinene	440968	1636	ACE
alpha-pinene	440968	5467	PPARD
alpha-pinene	440968	5468	PPARG
alpha-pinene	440968	3352	HTR1D
alpha-pinene	440968	10800	CYSLTR1
alpha-pinene	440968	2914	GRM4
alpha-pinene	440968	151	ADRA2B
alpha-pinene	440968	4986	OPRK1
alpha-pinene	440968	146	ADRA1D
alpha-pinene	440968	3614	IMPDH11
alpha-pinene	440968	5734	PTGER4
alpha-pinene	440968	5150	PDE7A
alpha-pinene	440968	3061	HCRTR1
alpha-pinene	440968	2155	F7
alpha-pinene	440968	23476	BRD4
alpha-pinene	440968	1457	CSNK2A1
alpha-pinene	440968	6530	SLC6A2
alpha-pinene	440968	4985	OPRD1
alpha-pinene	440968	4161	MC5R
alpha-pinene	440968	11343	MGLL
alpha-pinene	440968	2864	FFAR1
alpha-pinene	440968	3362	HTR6
alpha-pinene	440968	57016	AKR1B10
alpha-pinene	440968	2908	NR3C1
alpha-pinene	440968	5972	REN
alpha-pinene	440968	596	BCL2
alpha-pinene	440968	135	ADORA2A
alpha-pinene	440968	1131	CHRM3
alpha-pinene	440968	1816	DRD5
alpha-pinene	440968	3417	IDH1
alpha-pinene	440968	3065	HDAC1
alpha-pinene	440968	6868	ADAM17
alpha-pinene	440968	8242	KDM5C
alpha-pinene	440968	2162	F13
alpha-pinene	440968	5594	MAPK1
alpha-pinene	440968	2159	F10
alpha-pinene	440968	3620	IDO1
alpha-pinene	440968	10280	SIGMAR1
alpha-pinene	440968	102	ADAM10
alpha-pinene	440968	1232	CCR3
alpha-pinene	440968	4159	MC3R
alpha-pinene	440968	155	ADRB3
alpha-pinene	440968	1909	EDNRA
alpha-pinene	440968	10988	METAP2
alpha-pinene	440968	4312	MMP1
alpha-pinene	440968	8569	MKNK1
alpha-pinene	440968	10498	CARM1
alpha-pinene	440968	207	AKT
alpha-pinene	440968	5733	PTGER3
alpha-pinene	440968	4313	MMP2
alpha-pinene	440968	9261	MAPK2
alpha-pinene	440968	1803	DPP4
alpha-pinene	440968	6524	SLC5A2
alpha-pinene	440968	6716	SRD5A2
alpha-pinene	440968	221656	KDM1B
alpha-pinene	440968	5732	PTGER2
alpha-pinene	440968	2155	F7
alpha-pinene	440968	11040	PIM2
alpha-pinene	440968	5292	PIM1
alpha-pinene	440968	3693	ITGB5
alpha-pinene	440968	140	ADORA3
alpha-pinene	440968	2100	ESR2
alpha-pinene	440968	57105	CYSLTR2
alpha-pinene	440968	249	ALPL
alpha-pinene	440968	142	PARP1
alpha-pinene	440968	1513	CTSK
alpha-pinene	440968	5141	PDE4A
alpha-pinene	440968	3082	HGF
alpha-pinene	440968	164656	TMPRSS6
alpha-pinene	440968	238	ALK
alpha-pinene	440968	5770	PTPN1
alpha-pinene	440968	116085	SLC22A12
alpha-pinene	440968	3579	CXCR2
alpha-pinene	440968	4318	MMP9
alpha-pinene	440968	7422	VEGFA
alpha-pinene	440968	1903	S1PR3
alpha-pinene	440968	54878	DPP8
alpha-pinene	440968	136	ADORA2B
alpha-pinene	440968	5320	PLA2G2A
alpha-pinene	440968	1459	CSNK2A2
alpha-pinene	440968	3702	ITK
alpha-pinene	440968	1520	CTSS
alpha-pinene	440968	23463	ICMT
alpha-pinene	440968	3932	LCK
alpha-pinene	440968	10013	HDAC6
alpha-pinene	440968	10803	CCR9
alpha-pinene	440968	2160	F11
alpha-pinene	440968	771	CA12
alpha-pinene	440968	1592	CYP26A1
alpha-pinene	440968	4160	MC4R
alpha-pinene	440968	1387	CREBBP
alpha-pinene	440968	3818	KLKB1
alpha-pinene	440968	9294	S1PR2
alpha-pinene	440968	2158	F9
alpha-pinene	440968	3615	IMPDH2
alpha-pinene	440968	4193	MDM2
alpha-pinene	440968	887	CCKBR
alpha-pinene	440968	2260	FGFR1
alpha-pinene	440968	7862	BRPF1
alpha-pinene	440968	2570	GABRR2
alpha-pinene	440968	3351	HTR1B
alpha-pinene	440968	150	ADRA2A
alpha-pinene	440968	5566	PRKACA
alpha-pinene	440968	11091	WDR5
alpha-pinene	440968	22933	SIRT2
alpha-pinene	440968	2932	GSK3B
alpha-pinene	440968	1508	CTSB
alpha-pinene	440968	5328	PLAU
alpha-pinene	440968	552	AVPR1A
alpha-pinene	440968	152	ADRA2C
alpha-pinene	440968	5144	PDE4D
alpha-pinene	440968	3294	HSD17B2
alpha-pinene	440968	590	BCHE
alpha-pinene	440968	54103	GSAP
alpha-pinene	440968	231	AKR1B1
alpha-pinene	440968	6869	TACR1
alpha-pinene	440968	5293	PIK3CD
alpha-pinene	440968	5142	PDE4B
alpha-pinene	440968	759	CA1
alpha-pinene	440968	7076	THRA
alpha-pinene	440968	1233	CCR4
alpha-pinene	440968	673	BRAF
alpha-pinene	440968	7177	TPSAB1
alpha-pinene	440968	5152	PDE9A
alpha-pinene	440968	5689	PSMB1
alpha-pinene	440968	5600	MAPK11
alpha-pinene	440968	1234	CCR5
alpha-pinene	440968	1991	ELANE
alpha-pinene	440968	886	CCKAR
alpha-pinene	440968	7498	XDH
alpha-pinene	440968	2339	FNTA
alpha-pinene	440968	2902	GRIN1
alpha-pinene	440968	5296	PIK3R2
alpha-pinene	440968	4170	MCL1
alpha-pinene	440968	125981	ACER1
alpha-pinene	440968	57413	TMIGD3
alpha-pinene	440968	23621	BACE1
alpha-pinene	440968	2224	FDPS
alpha-pinene	440968	1548	CYP2A6
alpha-pinene	440968	153	ADRB1
alpha-pinene	440968	5591	PRKDC
alpha-pinene	440968	587	BCAT2
alpha-pinene	440968	10135	NAMPT
alpha-pinene	440968	2912	GRM2
alpha-pinene	440968	1432	MAPK14
alpha-pinene	440968	56848	SPHK2
alpha-pinene	440968	65980	BRD9
alpha-pinene	440968	624	BDKRB2
alpha-pinene	440968	50507	NOX4
alpha-pinene	440968	2099	ESR1
alpha-pinene	440968	5321	PLA2G4A
alpha-pinene	440968	8726	EED
alpha-pinene	440968	5300	PIN1
alpha-pinene	440968	7150	TOP1
alpha-pinene	440968	154	ADRB2
alpha-pinene	440968	6531	SLC6A3
alpha-pinene	440968	5927	KDM5A
alpha-pinene	440968	2867	FFAR2
alpha-pinene	440968	3156	HMGCR
alpha-pinene	440968	3577	CXCR1
alpha-pinene	440968	729230	CCR2
alpha-pinene	440968	6752	SSTR2
alpha-pinene	440968	2203	FBP1
alpha-pinene	440968	1129	CHRM2
alpha-pinene	440968	760	CA2
alpha-pinene	440968	7046	TGFBR1
alpha-pinene	440968	1544	CYP1A2
alpha-pinene	440968	1019	CDK4
alpha-pinene	440968	5595	MAPK3
alpha-pinene	440968	4835	NQO2
alpha-pinene	440968	5347	PLK1
alpha-pinene	440968	4886	NPY1R
alpha-pinene	440968	8841	HDAC3
alpha-pinene	440968	1728	NQO1
alpha-pinene	440968	6532	SLC6A4
alpha-pinene	440968	2903	GRIN2A
alpha-pinene	440968	314	AOC2
alpha-pinene	440968	904	CCNT1
alpha-pinene	440968	7421	VDR
alpha-pinene	440968	768	CA9
alpha-pinene	440968	472	ATM
alpha-pinene	440968	1956	EGFR
alpha-pinene	440968	1813	DRD2
alpha-pinene	440968	5771	PTPN2
alpha-pinene	440968	331	XIAP
alpha-pinene	440968	6755	SSTR5
camphene	6616	1136	CHRNA3
camphene	6616	1143	CHRNB4
camphene	6616	4923	NTSR1
camphene	6616	5641	LGMN
camphene	6616	1080	CFTR
camphene	6616	3359	HTR3A
camphene	6616	6098	ROS
camphene	6616	1140	CHRNB
camphene	6616	23186	RCOR1
camphene	6616	8564	KMO
camphene	6616	5478	CYPA
camphene	6616	8317	CDC7
camphene	6616	4133	MAP2
camphene	6616	4311	MME
camphene	6616	6275	A4
camphene	6616	241	ALOX5AP
camphene	6616	151	ADRA2B
camphene	6616	132	ADK
camphene	6616	3676	ITGA4
camphene	6616	6328	SCN3A
camphene	6616	5732	PTGER2
camphene	6616	3693	ITGB5
camphene	6616	823	CAPN1
camphene	6616	367	AR
camphene	6616	8435	SOAT2
camphene	6616	7068	THRB
camphene	6616	134	ADORA1
camphene	6616	4048	LTA4H
camphene	6616	8654	PDE5A
camphene	6616	91039	DPP9
camphene	6616	9536	PTGES
camphene	6616	3293	HSD17B3
camphene	6616	83933	HDAC10
camphene	6616	836	CASP3
camphene	6616	4988	OPRM1
camphene	6616	3551	IKBKB
camphene	6616	10000	AKT3
camphene	6616	1812	DRD1
camphene	6616	51284	TLR7
camphene	6616	3269	HRH1
camphene	6616	1815	DRD4
camphene	6616	2064	ERBB2
camphene	6616	11238	CA5B
camphene	6616	5138	PDE2A
camphene	6616	5550	PREP
camphene	6616	10203	CALCRL
camphene	6616	1268	CNR1
camphene	6616	2166	FAAH
camphene	6616	3356	HTR2A
camphene	6616	6839	SUV39H3
camphene	6616	834	CASP1
camphene	6616	4128	MAOA
camphene	6616	8399	PLA2G10
camphene	6616	5295	PIK3R1
camphene	6616	8622	PDE8B
camphene	6616	3274	HRH2
camphene	6616	5241	PGR
camphene	6616	43	ACHE
camphene	6616	1814	DRD3
camphene	6616	6916	TBXAS1
camphene	6616	10733	PLK4
camphene	6616	4887	NPY2R
camphene	6616	6865	TACR2
camphene	6616	7166	TPH1
camphene	6616	5747	PTK2
camphene	6616	766	CA7
camphene	6616	841	CASP8
camphene	6616	4363	ABCC1
camphene	6616	7442	TRPV1
camphene	6616	1636	ACE
camphene	6616	5467	PPARD
camphene	6616	5468	PPARG
camphene	6616	3352	HTR1D
camphene	6616	10800	CYSLTR1
camphene	6616	2914	GRM4
camphene	6616	4986	OPRK1
camphene	6616	146	ADRA1D
camphene	6616	3614	IMPDH1
camphene	6616	5734	PTGER4
camphene	6616	5150	PDE7A
camphene	6616	3061	HCRTR1
camphene	6616	2155	F7
camphene	6616	23476	BRD4
camphene	6616	1457	CSNK2A1
camphene	6616	6530	SLC6A2
camphene	6616	4985	OPRD1
camphene	6616	4161	MC5R
camphene	6616	11343	MGLL
camphene	6616	2864	FFAR1
camphene	6616	3362	HTR6
camphene	6616	57016	AKR1B10
camphene	6616	2908	NR3C1
camphene	6616	5972	REN
camphene	6616	596	BCL2
camphene	6616	135	ADORA2A
camphene	6616	1131	CHRM3
camphene	6616	1816	DRD5
camphene	6616	3417	IDH1
camphene	6616	3065	HDAC1
camphene	6616	6868	ADAM17
camphene	6616	8242	KDM5C
camphene	6616	2162	F13
camphene	6616	5594	MAPK1
camphene	6616	2159	F10
camphene	6616	3620	IDO1
camphene	6616	10280	SIGMAR1
camphene	6616	1133	CHRM5
camphene	6616	102	ADAM10
camphene	6616	1232	CCR3
camphene	6616	4159	MC3R
camphene	6616	155	ADRB3
camphene	6616	1909	EDNRA
camphene	6616	10988	METAP2
camphene	6616	4312	MMP1
camphene	6616	8569	MKNK1
camphene	6616	10498	CARM1
camphene	6616	207	AKT
camphene	6616	5733	PTGER3
camphene	6616	4313	MMP2
camphene	6616	9261	MAPK2
camphene	6616	3320	HSP90A
camphene	6616	1803	DPP4
camphene	6616	6524	SLC5A2
camphene	6616	6716	SRD5A2
camphene	6616	221656	KDM1B
camphene	6616	2155	F7
camphene	6616	11040	PIM2
camphene	6616	5292	PIM1
camphene	6616	140	ADORA3
camphene	6616	2100	ESR2
camphene	6616	57105	CYSLTR2
camphene	6616	249	ALPL
camphene	6616	142	PARP1
camphene	6616	1513	CTSK
camphene	6616	5141	PDE4A
camphene	6616	3082	HGF
camphene	6616	164656	TMPRSS6
camphene	6616	238	ALK
camphene	6616	5770	PTPN1
camphene	6616	116085	SLC22A12
camphene	6616	3579	CXCR2
camphene	6616	4318	MMP9
camphene	6616	7422	VEGFA
camphene	6616	1903	S1PR3
camphene	6616	54878	DPP8
camphene	6616	136	ADORA2B
camphene	6616	5320	PLA2G2A
camphene	6616	1459	CSNK2A2
camphene	6616	3702	ITK
camphene	6616	1520	CTSS
camphene	6616	23463	ICMT
camphene	6616	3932	LCK
camphene	6616	10013	HDAC6
camphene	6616	10803	CCR9
camphene	6616	2160	F11
camphene	6616	771	CA12
camphene	6616	1592	CYP26A1
camphene	6616	4160	MC4R
camphene	6616	1387	CREBBP
camphene	6616	3818	KLKB1
camphene	6616	9294	S1PR2
camphene	6616	2158	F9
camphene	6616	3615	IMPDH2
camphene	6616	4193	MDM2
camphene	6616	887	CCKBR
camphene	6616	2260	FGFR1
camphene	6616	7862	BRPF1
camphene	6616	2570	GABRR2
camphene	6616	3351	HTR1B
camphene	6616	150	ADRA2A
camphene	6616	5566	PRKACA
camphene	6616	11091	WDR5
camphene	6616	22933	SIRT2
camphene	6616	2932	GSK3B
camphene	6616	1508	CTSB
camphene	6616	5328	PLAU
camphene	6616	4886	NPY1R
camphene	6616	154661	RUNDC3B
camphene	6616	57110	HRASLS
camphene	6616	26002	MOXD1
camphene	6616	552	AVPR1A
camphene	6616	152	ADRA2C
camphene	6616	5144	PDE4D
camphene	6616	3294	HSD17B2
camphene	6616	590	BCHE
camphene	6616	54103	GSAP
camphene	6616	231	AKR1B1
camphene	6616	6869	TACR1
camphene	6616	5293	PIK3CD
camphene	6616	5142	PDE4B
camphene	6616	759	CA1
camphene	6616	7076	THRA
camphene	6616	1233	CCR4
camphene	6616	673	BRAF
camphene	6616	7177	TPSAB1
camphene	6616	5152	PDE9A
camphene	6616	5689	PSMB1
camphene	6616	5600	MAPK11
camphene	6616	1234	CCR5
camphene	6616	1991	ELANE
camphene	6616	886	CCKAR
camphene	6616	7498	XDH
camphene	6616	2339	FNTA
camphene	6616	2902	GRIN1
camphene	6616	5296	PIK3R2
camphene	6616	4170	MCL1
camphene	6616	125981	ACER1
camphene	6616	57413	TMIGD3
camphene	6616	23621	BACE1
camphene	6616	2224	FDPS
camphene	6616	1548	CYP2A6
camphene	6616	153	ADRB1
camphene	6616	5591	PRKDC
camphene	6616	587	BCAT2
camphene	6616	10135	NAMPT
camphene	6616	2912	GRM2
camphene	6616	1432	MAPK14
camphene	6616	56848	SPHK2
camphene	6616	65980	BRD9
camphene	6616	624	BDKRB2
camphene	6616	50507	NOX4
camphene	6616	2099	ESR1
camphene	6616	5321	PLA2G4A
camphene	6616	8726	EED
camphene	6616	5300	PIN1
camphene	6616	7150	TOP1
camphene	6616	154	ADRB2
camphene	6616	6531	SLC6A3
camphene	6616	5927	KDM5A
camphene	6616	2867	FFAR2
camphene	6616	3156	HMGCR
camphene	6616	3577	CXCR1
camphene	6616	729230	CCR2
camphene	6616	6752	SSTR2
camphene	6616	2203	FBP1
camphene	6616	1129	CHRM2
camphene	6616	760	CA2
camphene	6616	7046	TGFBR1
camphene	6616	1544	CYP1A2
camphene	6616	1019	CDK4
camphene	6616	5595	MAPK3
camphene	6616	1017	CDK2
camphene	6616	4835	NQO2
camphene	6616	5347	PLK1
camphene	6616	4886	NPY1R
camphene	6616	8841	HDAC3
camphene	6616	1728	NQO1
camphene	6616	6532	SLC6A4
camphene	6616	2903	GRIN2A
camphene	6616	314	AOC2
camphene	6616	904	CCNT1
camphene	6616	7421	VDR
camphene	6616	768	CA9
camphene	6616	472	ATM
camphene	6616	1956	EGFR
camphene	6616	1813	DRD2
camphene	6616	5771	PTPN2
camphene	6616	331	XIAP
camphene	6616	6755	SSTR5
folinic acid	135403648	83933	HDAC10
folinic acid	135403648	241	ALOX5AP
folinic acid	135403648	766	CA7
folinic acid	135403648	5734	PTGER4
folinic acid	135403648	3620	IDO1
folinic acid	135403648	8569	MKNK1
folinic acid	135403648	6328	SCN3A
folinic acid	135403648	5266	PI3
folinic acid	135403648	2173	FABP7
folinic acid	135403648	1288	COL4A6
folinic acid	135403648	5099	PCDH7
folinic acid	135403648	5641	LGMN
folinic acid	135403648	3693	ITGB5
folinic acid	135403648	823	CAPN1
folinic acid	135403648	771	CA12
folinic acid	135403648	3818	KLKB1
folinic acid	135403648	887	CCKBR
folinic acid	135403648	5293	PIK3CD
folinic acid	135403648	759	CA1
folinic acid	135403648	6098	ROS
folinic acid	135403648	2339	FNTA
folinic acid	135403648	57413	TMIGD3
folinic acid	135403648	587	BCAT2
folinic acid	135403648	10135	NAMPT
folinic acid	135403648	2912	GRM2
folinic acid	135403648	1432	MAPK14
folinic acid	135403648	56848	SPHK2
folinic acid	135403648	1017	CDK2
folinic acid	135403648	314	AOC2
folinic acid	135403648	5771	PTPN2
folinic acid	135403648	1143	CHRNB4
folinic acid	135403648	8564	KMO
folinic acid	135403648	4133	MAP2
folinic acid	135403648	7068	THRB
folinic acid	135403648	9536	PTGES
folinic acid	135403648	3551	IKBKB
folinic acid	135403648	5138	PDE2A
folinic acid	135403648	2166	FAAH
folinic acid	135403648	834	CASP1
folinic acid	135403648	6916	TBXAS1
folinic acid	135403648	6865	TACR2
folinic acid	135403648	4363	ABCC1
folinic acid	135403648	132	ADK
folinic acid	135403648	3061	HCRTR1
folinic acid	135403648	1457	CSNK2A1
folinic acid	135403648	8242	KDM5C
folinic acid	135403648	3676	ITGA4
folinic acid	135403648	10988	METAP2
folinic acid	135403648	3320	HSP90A
folinic acid	135403648	1803	DPP4
folinic acid	135403648	2155	F7
folinic acid	135403648	1513	CTSK
folinic acid	135403648	5770	PTPN1
folinic acid	135403648	1387	CREBBP
folinic acid	135403648	9294	S1PR2
folinic acid	135403648	3615	IMPDH2
folinic acid	135403648	4193	MDM2
folinic acid	135403648	2570	GABRR2
folinic acid	135403648	5566	PRKACA
folinic acid	135403648	1508	CTSB
folinic acid	135403648	5142	PDE4B
folinic acid	135403648	7177	TPSAB1
folinic acid	135403648	5152	PDE9A
folinic acid	135403648	7498	XDH
folinic acid	135403648	23621	BACE1
folinic acid	135403648	2224	FDPS
folinic acid	135403648	5591	PRKDC
folinic acid	135403648	624	BDKRB2
folinic acid	135403648	7150	TOP1
folinic acid	135403648	5927	KDM5A
folinic acid	135403648	3156	HMGCR
folinic acid	135403648	1019	CDK4
folinic acid	135403648	5595	MAPK3
folinic acid	135403648	768	CA9
folinic acid	135403648	472	ATM
folinic acid	135403648	331	XIAP
folinic acid	135403648	134	ADORA1
folinic acid	135403648	4048	LTA4H
folinic acid	135403648	8654	PDE5A
folinic acid	135403648	91039	DPP9
folinic acid	135403648	3293	HSD17B3
folinic acid	135403648	836	CASP3
folinic acid	135403648	4988	OPRM1
folinic acid	135403648	10000	AKT3
folinic acid	135403648	1812	DRD1
folinic acid	135403648	51284	TLR7
folinic acid	135403648	4311	MME
folinic acid	135403648	3269	HRH1
folinic acid	135403648	1815	DRD4
folinic acid	135403648	6275	A4
folinic acid	135403648	2064	ERBB2
folinic acid	135403648	11238	CA5B
folinic acid	135403648	1136	CHRNA3
folinic acid	135403648	5550	PREP
folinic acid	135403648	10203	CALCRL
folinic acid	135403648	1268	CNR1
folinic acid	135403648	3356	HTR2A
folinic acid	135403648	6839	SUV39H3
folinic acid	135403648	4128	MAOA
folinic acid	135403648	8399	PLA2G10
folinic acid	135403648	5295	PIK3R1
folinic acid	135403648	8622	PDE8B
folinic acid	135403648	3274	HRH2
folinic acid	135403648	5241	PGR
folinic acid	135403648	43	ACHE
folinic acid	135403648	1814	DRD3
folinic acid	135403648	10733	PLK4
folinic acid	135403648	4887	NPY2R
folinic acid	135403648	7166	TPH1
folinic acid	135403648	5747	PTK2
folinic acid	135403648	841	CASP8
folinic acid	135403648	7442	TRPV1
folinic acid	135403648	1636	ACE
folinic acid	135403648	5467	PPARD
folinic acid	135403648	5468	PPARG
folinic acid	135403648	3352	HTR1D
folinic acid	135403648	10800	CYSLTR1
folinic acid	135403648	2914	GRM4
folinic acid	135403648	151	ADRA2B
folinic acid	135403648	4986	OPRK1
folinic acid	135403648	146	ADRA1D
folinic acid	135403648	3614	IMPDH1
folinic acid	135403648	5150	PDE7A
folinic acid	135403648	2155	F7
folinic acid	135403648	23476	BRD4
folinic acid	135403648	6530	SLC6A2
folinic acid	135403648	4985	OPRD1
folinic acid	135403648	4161	MC5R
folinic acid	135403648	11343	MGLL
folinic acid	135403648	2864	FFAR1
folinic acid	135403648	3362	HTR6
folinic acid	135403648	57016	AKR1B10
folinic acid	135403648	2908	NR3C1
folinic acid	135403648	5972	REN
folinic acid	135403648	596	BCL2
folinic acid	135403648	135	ADORA2A
folinic acid	135403648	1131	CHRM3
folinic acid	135403648	1816	DRD5
folinic acid	135403648	3417	IDH1
folinic acid	135403648	3065	HDAC1
folinic acid	135403648	6868	ADAM17
folinic acid	135403648	2162	F13
folinic acid	135403648	5594	MAPK1
folinic acid	135403648	2159	F10
folinic acid	135403648	10280	SIGMAR1
folinic acid	135403648	1133	CHRM5
folinic acid	135403648	102	ADAM10
folinic acid	135403648	1232	CCR3
folinic acid	135403648	4159	MC3R
folinic acid	135403648	155	ADRB3
folinic acid	135403648	1909	EDNRA
folinic acid	135403648	4312	MMP1
folinic acid	135403648	10498	CARM1
folinic acid	135403648	207	AKT
folinic acid	135403648	5733	PTGER3
folinic acid	135403648	4313	MMP2
folinic acid	135403648	9261	MAPK2
folinic acid	135403648	4923	NTSR1
folinic acid	135403648	6524	SLC5A2
folinic acid	135403648	6716	SRD5A2
folinic acid	135403648	221656	KDM1B
folinic acid	135403648	5732	PTGER2
folinic acid	135403648	11040	PIM2
folinic acid	135403648	5292	PIM1
folinic acid	135403648	140	ADORA3
folinic acid	135403648	2100	ESR2
folinic acid	135403648	57105	CYSLTR2
folinic acid	135403648	249	ALPL
folinic acid	135403648	142	PARP1
folinic acid	135403648	5141	PDE4A
folinic acid	135403648	3082	HGF
folinic acid	135403648	164656	TMPRSS6
folinic acid	135403648	238	ALK
folinic acid	135403648	116085	SLC22A12
folinic acid	135403648	1080	CFTR
folinic acid	135403648	3579	CXCR2
folinic acid	135403648	4318	MMP9
folinic acid	135403648	7422	VEGFA
folinic acid	135403648	1903	S1PR3
folinic acid	135403648	54878	DPP8
folinic acid	135403648	136	ADORA2B
folinic acid	135403648	5320	PLA2G2A
folinic acid	135403648	1459	CSNK2A2
folinic acid	135403648	3702	ITK
folinic acid	135403648	1520	CTSS
folinic acid	135403648	23463	ICMT
folinic acid	135403648	3932	LCK
folinic acid	135403648	10013	HDAC6
folinic acid	135403648	367	AR
folinic acid	135403648	10803	CCR9
folinic acid	135403648	2160	F11
folinic acid	135403648	1592	CYP26A1
folinic acid	135403648	4160	MC4R
folinic acid	135403648	8435	SOAT2
folinic acid	135403648	2158	F9
folinic acid	135403648	2260	FGFR1
folinic acid	135403648	3359	HTR3A
folinic acid	135403648	7862	BRPF1
folinic acid	135403648	3351	HTR1B
folinic acid	135403648	150	ADRA2A
folinic acid	135403648	11091	WDR5
folinic acid	135403648	22933	SIRT2
folinic acid	135403648	2932	GSK3B
folinic acid	135403648	5328	PLAU
folinic acid	135403648	552	AVPR1A
folinic acid	135403648	152	ADRA2C
folinic acid	135403648	5144	PDE4D
folinic acid	135403648	3294	HSD17B2
folinic acid	135403648	590	BCHE
folinic acid	135403648	54103	GSAP
folinic acid	135403648	231	AKR1B1
folinic acid	135403648	6869	TACR1
folinic acid	135403648	7076	THRA
folinic acid	135403648	1233	CCR4
folinic acid	135403648	673	BRAF
folinic acid	135403648	5689	PSMB1
folinic acid	135403648	5600	MAPK11
folinic acid	135403648	1234	CCR5
folinic acid	135403648	1991	ELANE
folinic acid	135403648	886	CCKAR
folinic acid	135403648	2902	GRIN1
folinic acid	135403648	5296	PIK3R2
folinic acid	135403648	4170	MCL1
folinic acid	135403648	125981	ACER1
folinic acid	135403648	1548	CYP2A6
folinic acid	135403648	153	ADRB1
folinic acid	135403648	65980	BRD9
folinic acid	135403648	50507	NOX4
folinic acid	135403648	2099	ESR1
folinic acid	135403648	5321	PLA2G4A
folinic acid	135403648	8726	EED
folinic acid	135403648	5300	PIN1
folinic acid	135403648	154	ADRB2
folinic acid	135403648	6531	SLC6A3
folinic acid	135403648	2867	FFAR2
folinic acid	135403648	1140	CHRNB
folinic acid	135403648	3577	CXCR1
folinic acid	135403648	729230	CCR2
folinic acid	135403648	6752	SSTR2
folinic acid	135403648	2203	FBP1
folinic acid	135403648	1129	CHRM2
folinic acid	135403648	23186	RCOR1
folinic acid	135403648	760	CA2
folinic acid	135403648	7046	TGFBR1
folinic acid	135403648	1544	CYP1A2
folinic acid	135403648	4835	NQO2
folinic acid	135403648	5347	PLK1
folinic acid	135403648	4886	NPY1R
folinic acid	135403648	8841	HDAC3
folinic acid	135403648	1728	NQO1
folinic acid	135403648	6532	SLC6A4
folinic acid	135403648	5478	CYPA
folinic acid	135403648	2903	GRIN2A
folinic acid	135403648	904	CCNT1
folinic acid	135403648	7421	VDR
folinic acid	135403648	8317	CDC7
folinic acid	135403648	1956	EGFR
folinic acid	135403648	1813	DRD2
folinic acid	135403648	6755	SSTR5
isoquercitrin	5280804	4133	MAP2
isoquercitrin	5280804	83933	HDAC10
isoquercitrin	5280804	241	ALOX5AP
isoquercitrin	5280804	43	ACHE
isoquercitrin	5280804	57016	AKR1B10
isoquercitrin	5280804	3620	IDO1
isoquercitrin	5280804	102	ADAM10
isoquercitrin	5280804	6328	SCN3A
isoquercitrin	5280804	823	CAPN1
isoquercitrin	5280804	1513	CTSK
isoquercitrin	5280804	1903	S1PR3
isoquercitrin	5280804	1520	CTSS
isoquercitrin	5280804	771	CA12
isoquercitrin	5280804	5293	PIK3CD
isoquercitrin	5280804	6098	ROS
isoquercitrin	5280804	2902	GRIN1
isoquercitrin	5280804	1432	MAPK14
isoquercitrin	5280804	56848	SPHK2
isoquercitrin	5280804	7150	TOP1
isoquercitrin	5280804	314	AOC2
isoquercitrin	5280804	472	ATM
isoquercitrin	5280804	8569	MKNK1
isoquercitrin	5280804	8564	KMO
isoquercitrin	5280804	125981	ACER1
isoquercitrin	5280804	587	BCAT2
isoquercitrin	5280804	7068	THRB
isoquercitrin	5280804	3293	HSD17B3
isoquercitrin	5280804	3551	IKBKB
isoquercitrin	5280804	4311	MME
isoquercitrin	5280804	834	CASP1
isoquercitrin	5280804	6865	TACR2
isoquercitrin	5280804	766	CA7
isoquercitrin	5280804	4363	ABCC1
isoquercitrin	5280804	3352	HTR1D
isoquercitrin	5280804	10800	CYSLTR1
isoquercitrin	5280804	132	ADK
isoquercitrin	5280804	23476	BRD4
isoquercitrin	5280804	11343	MGLL
isoquercitrin	5280804	596	BCL2
isoquercitrin	5280804	8242	KDM5C
isoquercitrin	5280804	3676	ITGA4
isoquercitrin	5280804	10988	METAP2
isoquercitrin	5280804	3320	HSP90A
isoquercitrin	5280804	5732	PTGER2
isoquercitrin	5280804	2155	F7
isoquercitrin	5280804	142	PARP1
isoquercitrin	5280804	5141	PDE4A
isoquercitrin	5280804	136	ADORA2B
isoquercitrin	5280804	9294	S1PR2
isoquercitrin	5280804	3615	IMPDH2
isoquercitrin	5280804	4193	MDM2
isoquercitrin	5280804	2260	FGFR1
isoquercitrin	5280804	3351	HTR1B
isoquercitrin	5280804	5328	PLAU
isoquercitrin	5280804	54103	GSAP
isoquercitrin	5280804	1233	CCR4
isoquercitrin	5280804	5296	PIK3R2
isoquercitrin	5280804	57413	TMIGD3
isoquercitrin	5280804	2224	FDPS
isoquercitrin	5280804	5591	PRKDC
isoquercitrin	5280804	10135	NAMPT
isoquercitrin	5280804	2912	GRM2
isoquercitrin	5280804	624	BDKRB2
isoquercitrin	5280804	3577	CXCR1
isoquercitrin	5280804	23186	RCOR1
isoquercitrin	5280804	1019	CDK4
isoquercitrin	5280804	5595	MAPK3
isoquercitrin	5280804	1017	CDK2
isoquercitrin	5280804	4835	NQO2
isoquercitrin	5280804	904	CCNT1
isoquercitrin	5280804	7421	VDR
isoquercitrin	5280804	5771	PTPN2
isoquercitrin	5280804	134	ADORA1
isoquercitrin	5280804	4048	LTA4H
isoquercitrin	5280804	8654	PDE5A
isoquercitrin	5280804	10000	AKT3
isoquercitrin	5280804	1812	DRD1
isoquercitrin	5280804	51284	TLR7
isoquercitrin	5280804	3269	HRH1
isoquercitrin	5280804	1815	DRD4
isoquercitrin	5280804	6275	A4
isoquercitrin	5280804	2064	ERBB2
isoquercitrin	5280804	11238	CA5B
isoquercitrin	5280804	1136	CHRNA3
isoquercitrin	5280804	5138	PDE2A
isoquercitrin	5280804	5550	PREP
isoquercitrin	5280804	10203	CALCRL
isoquercitrin	5280804	1268	CNR1
isoquercitrin	5280804	2166	FAAH
isoquercitrin	5280804	3356	HTR2A
isoquercitrin	5280804	6839	SUV39H3
isoquercitrin	5280804	4128	MAOA
isoquercitrin	5280804	8399	PLA2G10
isoquercitrin	5280804	5295	PIK3R1
isoquercitrin	5280804	8622	PDE8B
isoquercitrin	5280804	3274	HRH2
isoquercitrin	5280804	5241	PGR
isoquercitrin	5280804	1814	DRD3
isoquercitrin	5280804	6916	TBXAS1
isoquercitrin	5280804	10733	PLK4
isoquercitrin	5280804	4887	NPY2R
isoquercitrin	5280804	1143	CHRNB4
isoquercitrin	5280804	7166	TPH1
isoquercitrin	5280804	5747	PTK2
isoquercitrin	5280804	841	CASP8
isoquercitrin	5280804	7442	TRPV1
isoquercitrin	5280804	1636	ACE
isoquercitrin	5280804	5467	PPARD
isoquercitrin	5280804	5468	PPARG
isoquercitrin	5280804	2914	GRM4
isoquercitrin	5280804	151	ADRA2B
isoquercitrin	5280804	4986	OPRK1
isoquercitrin	5280804	146	ADRA1D
isoquercitrin	5280804	3614	IMPDH1
isoquercitrin	5280804	5734	PTGER4
isoquercitrin	5280804	5150	PDE7A
isoquercitrin	5280804	3061	HCRTR1
isoquercitrin	5280804	2155	F7
isoquercitrin	5280804	1457	CSNK2A1
isoquercitrin	5280804	6530	SLC6A2
isoquercitrin	5280804	4985	OPRD1
isoquercitrin	5280804	4161	MC5R
isoquercitrin	5280804	2864	FFAR1
isoquercitrin	5280804	3362	HTR6
isoquercitrin	5280804	2908	NR3C1
isoquercitrin	5280804	5972	REN
isoquercitrin	5280804	135	ADORA2A
isoquercitrin	5280804	1131	CHRM3
isoquercitrin	5280804	1816	DRD5
isoquercitrin	5280804	3417	IDH1
isoquercitrin	5280804	3065	HDAC1
isoquercitrin	5280804	6868	ADAM17
isoquercitrin	5280804	2162	F13
isoquercitrin	5280804	5594	MAPK1
isoquercitrin	5280804	2159	F10
isoquercitrin	5280804	10280	SIGMAR1
isoquercitrin	5280804	1133	CHRM5
isoquercitrin	5280804	1232	CCR3
isoquercitrin	5280804	4159	MC3R
isoquercitrin	5280804	155	ADRB3
isoquercitrin	5280804	1909	EDNRA
isoquercitrin	5280804	4312	MMP1
isoquercitrin	5280804	10498	CARM1
isoquercitrin	5280804	207	AKT
isoquercitrin	5280804	5733	PTGER3
isoquercitrin	5280804	4313	MMP2
isoquercitrin	5280804	9261	MAPK2
isoquercitrin	5280804	4923	NTSR1
isoquercitrin	5280804	1803	DPP4
isoquercitrin	5280804	6524	SLC5A2
isoquercitrin	5280804	6716	SRD5A2
isoquercitrin	5280804	221656	KDM1B
isoquercitrin	5280804	11040	PIM2
isoquercitrin	5280804	5641	LGMN
isoquercitrin	5280804	5292	PIM1
isoquercitrin	5280804	3693	ITGB5
isoquercitrin	5280804	140	ADORA3
isoquercitrin	5280804	2100	ESR2
isoquercitrin	5280804	57105	CYSLTR2
isoquercitrin	5280804	249	ALPL
isoquercitrin	5280804	3082	HGF
isoquercitrin	5280804	164656	TMPRSS6
isoquercitrin	5280804	238	ALK
isoquercitrin	5280804	5770	PTPN1
isoquercitrin	5280804	116085	SLC22A12
isoquercitrin	5280804	1080	CFTR
isoquercitrin	5280804	3579	CXCR2
isoquercitrin	5280804	4318	MMP9
isoquercitrin	5280804	7422	VEGFA
isoquercitrin	5280804	54878	DPP8
isoquercitrin	5280804	5320	PLA2G2A
isoquercitrin	5280804	1459	CSNK2A2
isoquercitrin	5280804	3702	ITK
isoquercitrin	5280804	23463	ICMT
isoquercitrin	5280804	3932	LCK
isoquercitrin	5280804	10013	HDAC6
isoquercitrin	5280804	367	AR
isoquercitrin	5280804	10803	CCR9
isoquercitrin	5280804	2160	F11
isoquercitrin	5280804	1592	CYP26A1
isoquercitrin	5280804	4160	MC4R
isoquercitrin	5280804	1387	CREBBP
isoquercitrin	5280804	8435	SOAT2
isoquercitrin	5280804	3818	KLKB1
isoquercitrin	5280804	2158	F9
isoquercitrin	5280804	887	CCKBR
isoquercitrin	5280804	3359	HTR3A
isoquercitrin	5280804	7862	BRPF1
isoquercitrin	5280804	2570	GABRR2
isoquercitrin	5280804	150	ADRA2A
isoquercitrin	5280804	5566	PRKACA
isoquercitrin	5280804	11091	WDR5
isoquercitrin	5280804	22933	SIRT2
isoquercitrin	5280804	2932	GSK3B
isoquercitrin	5280804	1508	CTSB
isoquercitrin	5280804	552	AVPR1A
isoquercitrin	5280804	152	ADRA2C
isoquercitrin	5280804	5144	PDE4D
isoquercitrin	5280804	3294	HSD17B2
isoquercitrin	5280804	590	BCHE
isoquercitrin	5280804	231	AKR1B1
isoquercitrin	5280804	6869	TACR1
isoquercitrin	5280804	5142	PDE4B
isoquercitrin	5280804	759	CA1
isoquercitrin	5280804	7076	THRA
isoquercitrin	5280804	673	BRAF
isoquercitrin	5280804	7177	TPSAB1
isoquercitrin	5280804	5152	PDE9A
isoquercitrin	5280804	5689	PSMB1
isoquercitrin	5280804	5600	MAPK11
isoquercitrin	5280804	1234	CCR5
isoquercitrin	5280804	1991	ELANE
isoquercitrin	5280804	886	CCKAR
isoquercitrin	5280804	7498	XDH
isoquercitrin	5280804	2339	FNTA
isoquercitrin	5280804	4170	MCL1
isoquercitrin	5280804	23621	BACE1
isoquercitrin	5280804	1548	CYP2A6
isoquercitrin	5280804	153	ADRB1
isoquercitrin	5280804	65980	BRD9
isoquercitrin	5280804	50507	NOX4
isoquercitrin	5280804	2099	ESR1
isoquercitrin	5280804	5321	PLA2G4A
isoquercitrin	5280804	8726	EED
isoquercitrin	5280804	5300	PIN1
isoquercitrin	5280804	154	ADRB2
isoquercitrin	5280804	6531	SLC6A3
isoquercitrin	5280804	5927	KDM5A
isoquercitrin	5280804	2867	FFAR2
isoquercitrin	5280804	3156	HMGCR
isoquercitrin	5280804	1140	CHRNB
isoquercitrin	5280804	729230	CCR2
isoquercitrin	5280804	6752	SSTR2
isoquercitrin	5280804	2203	FBP1
isoquercitrin	5280804	1129	CHRM2
isoquercitrin	5280804	760	CA2
isoquercitrin	5280804	7046	TGFBR1
isoquercitrin	5280804	1544	CYP1A2
isoquercitrin	5280804	5347	PLK1
isoquercitrin	5280804	4886	NPY1R
isoquercitrin	5280804	8841	HDAC3
isoquercitrin	5280804	1728	NQO1
isoquercitrin	5280804	6532	SLC6A4
isoquercitrin	5280804	5478	CYPA
isoquercitrin	5280804	2903	GRIN2A
isoquercitrin	5280804	768	CA9
isoquercitrin	5280804	8317	CDC7
isoquercitrin	5280804	1956	EGFR
isoquercitrin	5280804	1813	DRD2
isoquercitrin	5280804	331	XIAP
isoquercitrin	5280804	6755	SSTR5
limonene	22311	1136	CHRNA3
limonene	22311	1143	CHRNB4
limonene	22311	5641	LGMN
limonene	22311	3359	HTR3A
limonene	22311	6098	ROS
limonene	22311	1140	CHRNB
limonene	22311	23186	RCOR1
limonene	22311	8564	KMO
limonene	22311	8317	CDC7
limonene	22311	4133	MAP2
limonene	22311	91039	DPP9
limonene	22311	9536	PTGES
limonene	22311	6275	A4
limonene	22311	11238	CA5B
limonene	22311	841	CASP8
limonene	22311	132	ADK
limonene	22311	3676	ITGA4
limonene	22311	6328	SCN3A
limonene	22311	4923	NTSR1
limonene	22311	823	CAPN1
limonene	22311	5141	PDE4A
limonene	22311	54878	DPP8
limonene	22311	367	AR
limonene	22311	8435	SOAT2
limonene	22311	590	BCHE
limonene	22311	5296	PIK3R2
limonene	22311	5300	PIN1
limonene	22311	1017	CDK2
limonene	22311	7068	THRB
limonene	22311	134	ADORA1
limonene	22311	4048	LTA4H
limonene	22311	8654	PDE5A
limonene	22311	3293	HSD17B3
limonene	22311	83933	HDAC10
limonene	22311	836	CASP3
limonene	22311	4988	OPRM1
limonene	22311	3551	IKBKB
limonene	22311	10000	AKT3
limonene	22311	1812	DRD1
limonene	22311	51284	TLR7
limonene	22311	4311	MME
limonene	22311	3269	HRH1
limonene	22311	1815	DRD4
limonene	22311	2064	ERBB2
limonene	22311	5138	PDE2A
limonene	22311	5550	PREP
limonene	22311	241	ALOX5AP
limonene	22311	10203	CALCRL
limonene	22311	1268	CNR1
limonene	22311	2166	FAAH
limonene	22311	3356	HTR2A
limonene	22311	6839	SUV39H3
limonene	22311	834	CASP1
limonene	22311	4128	MAOA
limonene	22311	8399	PLA2G10
limonene	22311	5295	PIK3R1
limonene	22311	8622	PDE8B
limonene	22311	3274	HRH2
limonene	22311	5241	PGR
limonene	22311	43	ACHE
limonene	22311	1814	DRD3
limonene	22311	6916	TBXAS1
limonene	22311	10733	PLK4
limonene	22311	4887	NPY2R
limonene	22311	6865	TACR2
limonene	22311	7166	TPH1
limonene	22311	5747	PTK2
limonene	22311	766	CA7
limonene	22311	4363	ABCC1
limonene	22311	7442	TRPV1
limonene	22311	1636	ACE
limonene	22311	5467	PPARD
limonene	22311	5468	PPARG
limonene	22311	3352	HTR1D
limonene	22311	10800	CYSLTR1
limonene	22311	2914	GRM4
limonene	22311	151	ADRA2B
limonene	22311	4986	OPRK1
limonene	22311	146	ADRA1D
limonene	22311	3614	IMPDH1
limonene	22311	5734	PTGER4
limonene	22311	5150	PDE7A
limonene	22311	3061	HCRTR1
limonene	22311	2155	F7
limonene	22311	23476	BRD4
limonene	22311	1457	CSNK2A1
limonene	22311	6530	SLC6A2
limonene	22311	4985	OPRD1
limonene	22311	4161	MC5R
limonene	22311	11343	MGLL
limonene	22311	2864	FFAR1
limonene	22311	3362	HTR6
limonene	22311	57016	AKR1B10
limonene	22311	2908	NR3C1
limonene	22311	5972	REN
limonene	22311	596	BCL2
limonene	22311	135	ADORA2A
limonene	22311	1131	CHRM3
limonene	22311	1816	DRD5
limonene	22311	3417	IDH1
limonene	22311	3065	HDAC1
limonene	22311	6868	ADAM17
limonene	22311	8242	KDM5C
limonene	22311	2162	F13
limonene	22311	5594	MAPK1
limonene	22311	2159	F10
limonene	22311	3620	IDO1
limonene	22311	10280	SIGMAR1
limonene	22311	1133	CHRM5
limonene	22311	102	ADAM10
limonene	22311	1232	CCR3
limonene	22311	4159	MC3R
limonene	22311	155	ADRB3
limonene	22311	1909	EDNRA
limonene	22311	10988	METAP2
limonene	22311	4312	MMP1
limonene	22311	8569	MKNK1
limonene	22311	10498	CARM1
limonene	22311	207	AKT
limonene	22311	5733	PTGER3
limonene	22311	4313	MMP2
limonene	22311	9261	MAPK2
limonene	22311	3320	HSP90A
limonene	22311	1803	DPP4
limonene	22311	6524	SLC5A2
limonene	22311	6716	SRD5A2
limonene	22311	221656	KDM1B
limonene	22311	5732	PTGER2
limonene	22311	2155	F7
limonene	22311	11040	PIM2
limonene	22311	5292	PIM1
limonene	22311	3693	ITGB5
limonene	22311	140	ADORA3
limonene	22311	2100	ESR2
limonene	22311	57105	CYSLTR2
limonene	22311	249	ALPL
limonene	22311	142	PARP1
limonene	22311	1513	CTSK
limonene	22311	3082	HGF
limonene	22311	164656	TMPRSS6
limonene	22311	238	ALK
limonene	22311	5770	PTPN1
limonene	22311	116085	SLC22A12
limonene	22311	1080	CFTR
limonene	22311	3579	CXCR2
limonene	22311	4318	MMP9
limonene	22311	7422	VEGFA
limonene	22311	1903	S1PR3
limonene	22311	136	ADORA2B
limonene	22311	5320	PLA2G2A
limonene	22311	1459	CSNK2A2
limonene	22311	3702	ITK
limonene	22311	1520	CTSS
limonene	22311	23463	ICMT
limonene	22311	3932	LCK
limonene	22311	10013	HDAC6
limonene	22311	10803	CCR9
limonene	22311	2160	F11
limonene	22311	771	CA12
limonene	22311	10257	ABCC4
limonene	22311	9848	MFAP3L
limonene	22311	1592	CYP26A1
limonene	22311	4160	MC4R
limonene	22311	1387	CREBBP
limonene	22311	3818	KLKB1
limonene	22311	9294	S1PR2
limonene	22311	2158	F9
limonene	22311	3615	IMPDH2
limonene	22311	4193	MDM2
limonene	22311	887	CCKBR
limonene	22311	2260	FGFR1
limonene	22311	7862	BRPF1
limonene	22311	2570	GABRR2
limonene	22311	3351	HTR1B
limonene	22311	150	ADRA2A
limonene	22311	5566	PRKACA
limonene	22311	11091	WDR5
limonene	22311	22933	SIRT2
limonene	22311	2932	GSK3B
limonene	22311	1508	CTSB
limonene	22311	5328	PLAU
limonene	22311	552	AVPR1A
limonene	22311	152	ADRA2C
limonene	22311	5144	PDE4D
limonene	22311	3294	HSD17B2
limonene	22311	54103	GSAP
limonene	22311	231	AKR1B1
limonene	22311	6869	TACR1
limonene	22311	5293	PIK3CD
limonene	22311	5142	PDE4B
limonene	22311	759	CA1
limonene	22311	7076	THRA
limonene	22311	1233	CCR4
limonene	22311	673	BRAF
limonene	22311	7177	TPSAB1
limonene	22311	5152	PDE9A
limonene	22311	5689	PSMB1
limonene	22311	5600	MAPK11
limonene	22311	1234	CCR5
limonene	22311	1991	ELANE
limonene	22311	886	CCKAR
limonene	22311	7498	XDH
limonene	22311	2339	FNTA
limonene	22311	2902	GRIN1
limonene	22311	4170	MCL1
limonene	22311	125981	ACER1
limonene	22311	57413	TMIGD3
limonene	22311	23621	BACE1
limonene	22311	2224	FDPS
limonene	22311	1548	CYP2A6
limonene	22311	153	ADRB1
limonene	22311	5591	PRKDC
limonene	22311	587	BCAT2
limonene	22311	10135	NAMPT
limonene	22311	2912	GRM2
limonene	22311	1432	MAPK14
limonene	22311	56848	SPHK2
limonene	22311	65980	BRD9
limonene	22311	624	BDKRB2
limonene	22311	50507	NOX4
limonene	22311	2099	ESR1
limonene	22311	5321	PLA2G4A
limonene	22311	8726	EED
limonene	22311	7150	TOP1
limonene	22311	154	ADRB2
limonene	22311	6531	SLC6A3
limonene	22311	5927	KDM5A
limonene	22311	2867	FFAR2
limonene	22311	3156	HMGCR
limonene	22311	3577	CXCR1
limonene	22311	729230	CCR2
limonene	22311	6752	SSTR2
limonene	22311	2203	FBP1
limonene	22311	1129	CHRM2
limonene	22311	760	CA2
limonene	22311	7046	TGFBR1
limonene	22311	1544	CYP1A2
limonene	22311	1019	CDK4
limonene	22311	5595	MAPK3
limonene	22311	4835	NQO2
limonene	22311	5347	PLK1
limonene	22311	4886	NPY1R
limonene	22311	8841	HDAC3
limonene	22311	1728	NQO1
limonene	22311	6532	SLC6A4
limonene	22311	5478	CYPA
limonene	22311	2903	GRIN2A
limonene	22311	314	AOC2
limonene	22311	904	CCNT1
limonene	22311	7421	VDR
limonene	22311	768	CA9
limonene	22311	472	ATM
limonene	22311	1956	EGFR
limonene	22311	1813	DRD2
limonene	22311	5771	PTPN2
limonene	22311	331	XIAP
limonene	22311	6755	SSTR5
stearic acid	5281	4133	MAP2
stearic acid	5281	1143	CHRNB4
stearic acid	5281	6328	SCN3A
stearic acid	5281	5641	LGMN
stearic acid	5281	249	ALPL
stearic acid	5281	3359	HTR3A
stearic acid	5281	6098	ROS
stearic acid	5281	1140	CHRNB
stearic acid	5281	51284	TLR7
stearic acid	5281	823	CAPN1
stearic acid	5281	125981	ACER1
stearic acid	5281	8317	CDC7
stearic acid	5281	91039	DPP9
stearic acid	5281	1136	CHRNA3
stearic acid	5281	6916	TBXAS1
stearic acid	5281	766	CA7
stearic acid	5281	596	BCL2
stearic acid	5281	3676	ITGA4
stearic acid	5281	10988	METAP2
stearic acid	5281	2100	ESR2
stearic acid	5281	3615	IMPDH2
stearic acid	5281	2570	GABRR2
stearic acid	5281	7076	THRA
stearic acid	5281	7177	TPSAB1
stearic acid	5281	5591	PRKDC
stearic acid	5281	7150	TOP1
stearic acid	5281	3156	HMGCR
stearic acid	5281	4835	NQO2
stearic acid	5281	7421	VDR
stearic acid	5281	7068	THRB
stearic acid	5281	134	ADORA1
stearic acid	5281	4048	LTA4H
stearic acid	5281	8654	PDE5A
stearic acid	5281	9536	PTGES
stearic acid	5281	3293	HSD17B3
stearic acid	5281	83933	HDAC10
stearic acid	5281	836	CASP3
stearic acid	5281	4988	OPRM1
stearic acid	5281	3551	IKBKB
stearic acid	5281	10000	AKT3
stearic acid	5281	1812	DRD1
stearic acid	5281	4311	MME
stearic acid	5281	3269	HRH1
stearic acid	5281	1815	DRD4
stearic acid	5281	6275	A4
stearic acid	5281	2064	ERBB2
stearic acid	5281	11238	CA5B
stearic acid	5281	5138	PDE2A
stearic acid	5281	5550	PREP
stearic acid	5281	241	ALOX5AP
stearic acid	5281	10203	CALCRL
stearic acid	5281	1268	CNR1
stearic acid	5281	2166	FAAH
stearic acid	5281	3356	HTR2A
stearic acid	5281	6839	SUV39H3
stearic acid	5281	834	CASP1
stearic acid	5281	4128	MAOA
stearic acid	5281	8399	PLA2G10
stearic acid	5281	5295	PIK3R1
stearic acid	5281	8622	PDE8B
stearic acid	5281	3274	HRH2
stearic acid	5281	5241	PGR
stearic acid	5281	43	ACHE
stearic acid	5281	1814	DRD3
stearic acid	5281	10733	PLK4
stearic acid	5281	4887	NPY2R
stearic acid	5281	6865	TACR2
stearic acid	5281	7166	TPH1
stearic acid	5281	5747	PTK2
stearic acid	5281	841	CASP8
stearic acid	5281	4363	ABCC1
stearic acid	5281	7442	TRPV1
stearic acid	5281	1636	ACE
stearic acid	5281	5467	PPARD
stearic acid	5281	5468	PPARG
stearic acid	5281	3352	HTR1D
stearic acid	5281	10800	CYSLTR1
stearic acid	5281	2914	GRM4
stearic acid	5281	151	ADRA2B
stearic acid	5281	4986	OPRK1
stearic acid	5281	146	ADRA1D
stearic acid	5281	3614	IMPDH1
stearic acid	5281	5734	PTGER4
stearic acid	5281	5150	PDE7A
stearic acid	5281	132	ADK
stearic acid	5281	3061	HCRTR1
stearic acid	5281	2155	F7
stearic acid	5281	23476	BRD4
stearic acid	5281	1457	CSNK2A1
stearic acid	5281	6530	SLC6A2
stearic acid	5281	4985	OPRD1
stearic acid	5281	4161	MC5R
stearic acid	5281	11343	MGLL
stearic acid	5281	2864	FFAR1
stearic acid	5281	3362	HTR6
stearic acid	5281	57016	AKR1B10
stearic acid	5281	2908	NR3C1
stearic acid	5281	5972	REN
stearic acid	5281	135	ADORA2A
stearic acid	5281	1131	CHRM3
stearic acid	5281	1816	DRD5
stearic acid	5281	3417	IDH1
stearic acid	5281	3065	HDAC1
stearic acid	5281	6868	ADAM17
stearic acid	5281	8242	KDM5C
stearic acid	5281	2162	F13
stearic acid	5281	5594	MAPK1
stearic acid	5281	2159	F10
stearic acid	5281	3620	IDO1
stearic acid	5281	10280	SIGMAR1
stearic acid	5281	1133	CHRM5
stearic acid	5281	102	ADAM10
stearic acid	5281	1232	CCR3
stearic acid	5281	4159	MC3R
stearic acid	5281	155	ADRB3
stearic acid	5281	1909	EDNRA
stearic acid	5281	4312	MMP1
stearic acid	5281	8569	MKNK1
stearic acid	5281	10498	CARM1
stearic acid	5281	207	AKT
stearic acid	5281	5733	PTGER3
stearic acid	5281	4313	MMP2
stearic acid	5281	9261	MAPK2
stearic acid	5281	3320	HSP90A
stearic acid	5281	4923	NTSR1
stearic acid	5281	1803	DPP4
stearic acid	5281	6524	SLC5A2
stearic acid	5281	6716	SRD5A2
stearic acid	5281	221656	KDM1B
stearic acid	5281	5732	PTGER2
stearic acid	5281	2155	F7
stearic acid	5281	11040	PIM2
stearic acid	5281	5292	PIM1
stearic acid	5281	3693	ITGB5
stearic acid	5281	140	ADORA3
stearic acid	5281	57105	CYSLTR2
stearic acid	5281	142	PARP1
stearic acid	5281	1513	CTSK
stearic acid	5281	5141	PDE4A
stearic acid	5281	3082	HGF
stearic acid	5281	164656	TMPRSS6
stearic acid	5281	8564	KMO
stearic acid	5281	238	ALK
stearic acid	5281	5770	PTPN1
stearic acid	5281	116085	SLC22A12
stearic acid	5281	1080	CFTR
stearic acid	5281	3579	CXCR2
stearic acid	5281	4318	MMP9
stearic acid	5281	7422	VEGFA
stearic acid	5281	1903	S1PR3
stearic acid	5281	54878	DPP8
stearic acid	5281	136	ADORA2B
stearic acid	5281	5320	PLA2G2A
stearic acid	5281	1459	CSNK2A2
stearic acid	5281	3702	ITK
stearic acid	5281	1520	CTSS
stearic acid	5281	23463	ICMT
stearic acid	5281	3932	LCK
stearic acid	5281	10013	HDAC6
stearic acid	5281	367	AR
stearic acid	5281	10803	CCR9
stearic acid	5281	2160	F11
stearic acid	5281	771	CA12
stearic acid	5281	1592	CYP26A1
stearic acid	5281	4160	MC4R
stearic acid	5281	1387	CREBBP
stearic acid	5281	8435	SOAT2
stearic acid	5281	3818	KLKB1
stearic acid	5281	9294	S1PR2
stearic acid	5281	2158	F9
stearic acid	5281	4193	MDM2
stearic acid	5281	887	CCKBR
stearic acid	5281	2260	FGFR1
stearic acid	5281	7862	BRPF1
stearic acid	5281	3351	HTR1B
stearic acid	5281	150	ADRA2A
stearic acid	5281	5566	PRKACA
stearic acid	5281	11091	WDR5
stearic acid	5281	22933	SIRT2
stearic acid	5281	2932	GSK3B
stearic acid	5281	1508	CTSB
stearic acid	5281	5328	PLAU
stearic acid	5281	552	AVPR1A
stearic acid	5281	152	ADRA2C
stearic acid	5281	5144	PDE4D
stearic acid	5281	3294	HSD17B2
stearic acid	5281	590	BCHE
stearic acid	5281	54103	GSAP
stearic acid	5281	231	AKR1B1
stearic acid	5281	6869	TACR1
stearic acid	5281	5293	PIK3CD
stearic acid	5281	5142	PDE4B
stearic acid	5281	759	CA1
stearic acid	5281	1233	CCR4
stearic acid	5281	673	BRAF
stearic acid	5281	5152	PDE9A
stearic acid	5281	5689	PSMB1
stearic acid	5281	5600	MAPK11
stearic acid	5281	1234	CCR5
stearic acid	5281	1991	ELANE
stearic acid	5281	886	CCKAR
stearic acid	5281	7498	XDH
stearic acid	5281	2339	FNTA
stearic acid	5281	2902	GRIN1
stearic acid	5281	5296	PIK3R2
stearic acid	5281	4170	MCL1
stearic acid	5281	57413	TMIGD3
stearic acid	5281	23621	BACE1
stearic acid	5281	2224	FDPS
stearic acid	5281	1548	CYP2A6
stearic acid	5281	153	ADRB1
stearic acid	5281	587	BCAT2
stearic acid	5281	10135	NAMPT
stearic acid	5281	2912	GRM2
stearic acid	5281	1432	MAPK14
stearic acid	5281	56848	SPHK2
stearic acid	5281	65980	BRD9
stearic acid	5281	624	BDKRB2
stearic acid	5281	50507	NOX4
stearic acid	5281	2099	ESR1
stearic acid	5281	5321	PLA2G4A
stearic acid	5281	8726	EED
stearic acid	5281	5300	PIN1
stearic acid	5281	154	ADRB2
[truncated: 33 more rows]
