# Supplementary material for: Network medicine framework identified drug-repurposing opportunities of pharmaco-active compounds of Angelica acutiloba (Siebold & Zucc.) Kitag. for skin aging
Source: Aging (Albany NY). 2023 Jun 12;15(11):5144–63. doi: 10.18632/aging.204789 (PMC10292898; doi:10.18632/aging.204789)
Supplement: Supplementary Table 3 [file aging-15-204789-s003.xlsx]

## Sheet: Sheet1
Supplementary Table 3. Jaccard index of targets among AAK compounds and human PPI interactome.
[1] 0.000000000 0.000000000 0.000000000 0.000000000 0.000000000 0.000000000 0.000000000 0.000000000
[9] 0.000000000 0.000000000 0.000000000 0.000000000 0.000000000 0.000000000 0.000000000 0.000000000
[17] 0.000000000 0.000000000 0.000000000 0.000000000 0.000000000 0.000000000 0.000000000 0.000000000
[25] 0.000000000 0.000000000 0.000000000 0.000000000 0.000000000 0.000000000 0.000000000 0.015625000
[33] 0.000000000 0.000000000 0.000000000 0.000000000 0.000000000 0.000000000 0.000000000 0.222222222
[41] 0.000000000 0.040000000 0.000000000 0.000000000 0.000000000 0.000000000 0.000000000 0.000000000
[49] 0.000000000 0.000000000 0.153846154 0.000000000 0.061224490 0.000000000 0.000000000 0.000000000
[57] 0.000000000 0.016393443 0.000000000 0.000000000 0.000000000 0.000000000 0.000000000 0.000000000
[65] 0.000000000 0.000000000 0.000000000 0.000000000 0.000000000 0.000000000 0.000000000 0.000000000
[73] 0.000000000 0.000000000 0.000000000 0.000000000 0.000000000 0.000000000 0.042553191 0.000000000
[81] 0.000000000 0.000000000 0.000000000 0.000000000 0.000000000 0.000000000 0.000000000 0.000000000
[89] 0.000000000 0.000000000 0.000000000 0.000000000 0.000000000 0.000000000 0.000000000 0.000000000
[97] 0.000000000 0.000000000 0.000000000 0.000000000 0.000000000 0.000000000 0.000000000 0.000000000
[105] 0.000000000 0.000000000 0.000000000 0.000000000 0.000000000 0.000000000 0.000000000 0.000000000
[113] 0.000000000 0.000000000 0.000000000 0.000000000 0.000000000 0.000000000 0.000000000 0.000000000
[121] 0.000000000 0.000000000 0.000000000 0.000000000 0.000000000 0.000000000 0.000000000 0.000000000
[129] 0.000000000 0.000000000 0.000000000 0.000000000 0.031250000 0.016393443 0.000000000 0.026548673
[137] 0.014285714 0.000000000 0.000000000 0.094594595 0.088888889 0.010526316 0.048387097 0.000000000
[145] 0.000000000 0.076923077 0.014925373 0.026315789 0.029411765 0.000000000 0.103092784 0.140625000
[153] 0.015151515 0.000000000 0.000000000 0.000000000 0.000000000 0.000000000 0.000000000 0.000000000
[161] 0.000000000 0.000000000 0.000000000 0.000000000 0.000000000 0.000000000 0.000000000 0.000000000
[169] 0.000000000 0.000000000 0.000000000 0.000000000 0.000000000 0.000000000 0.000000000 0.000000000
[177] 0.000000000 0.000000000 0.000000000 0.000000000 0.000000000 0.000000000 0.000000000 0.000000000
[185] 0.021276596 0.000000000 0.000000000 0.000000000 0.047619048 0.000000000 0.034482759 0.000000000
[193] 0.000000000 0.000000000 0.000000000 0.000000000 0.000000000 0.000000000 0.016393443 0.000000000
[201] 0.000000000 0.000000000 0.038461538 0.023255814 0.000000000 0.000000000 0.000000000 0.000000000
[209] 0.000000000 0.000000000 0.043478261 0.000000000 0.000000000 0.000000000 0.000000000 0.012658228
[217] 0.000000000 0.000000000 0.000000000 0.000000000 0.000000000 0.000000000 0.000000000 0.000000000
[225] 0.166666667 0.000000000 0.000000000 0.090909091 0.000000000 0.000000000 0.000000000 0.000000000
[233] 0.020833333 0.000000000 0.000000000 0.000000000 0.000000000 0.000000000 0.000000000 0.000000000
[241] 0.000000000 0.000000000 0.000000000 0.000000000 0.000000000 0.000000000 0.000000000 0.000000000
[249] 0.000000000 0.000000000 0.000000000 0.000000000 0.000000000 0.000000000 0.016393443 0.000000000
[257] 0.013157895 0.032967033 0.000000000 0.000000000 0.031746032 0.000000000 0.000000000 0.015873016
[265] 0.000000000 0.015384615 0.000000000 0.000000000 0.000000000 0.023622047 0.000000000 0.000000000
[273] 0.103448276 0.289473684 0.021739130 0.000000000 0.000000000 0.000000000 0.000000000 0.117647059
[281] 0.000000000 0.000000000 0.055555556 0.074074074 0.043478261 0.000000000 0.000000000 0.000000000
[289] 0.000000000 0.000000000 0.000000000 0.000000000 0.000000000 0.000000000 0.000000000 0.000000000
[297] 0.000000000 0.000000000 0.019230769 0.000000000 0.000000000 0.000000000 0.000000000 0.000000000
[305] 0.000000000 0.000000000 0.000000000 0.000000000 0.000000000 0.000000000 0.000000000 0.000000000
[313] 0.000000000 0.000000000 0.000000000 0.113207547 0.036363636 0.040000000 0.000000000 0.000000000
[321] 0.000000000 0.035714286 0.083333333 0.033333333 0.035714286 0.096774194 0.062500000 0.021505376
[329] 0.013698630 0.023809524 0.000000000 0.000000000 0.000000000 0.045454545 0.056603774 0.000000000
[337] 0.022222222 0.103896104 0.040816327 0.009009009 0.025000000 0.071428571 0.000000000 0.000000000
[345] 0.023255814 0.000000000 0.000000000 0.000000000 0.037500000 0.020833333 0.009174312 0.000000000
[353] 0.000000000 0.153846154 0.000000000 0.045454545 0.000000000 0.000000000 0.061224490 0.058823529
[361] 0.000000000 0.000000000 0.000000000 0.000000000 0.000000000 0.000000000 0.000000000 0.000000000
[369] 0.000000000 0.012195122 0.000000000 0.000000000 0.000000000 0.000000000 0.000000000 0.000000000
[377] 0.000000000 0.000000000 0.000000000 0.000000000 0.000000000 0.000000000 0.036363636 0.045454545
[385] 0.000000000 0.000000000 0.058823529 0.066666667 0.057692308 0.050000000 0.012345679 0.000000000
[393] 0.000000000 0.015625000 0.033333333 0.000000000 0.000000000 0.055555556 0.045454545 0.012048193
[401] 0.037735849 0.000000000 0.000000000 0.034482759 0.016806723 0.000000000
dist
[1,] 1 2 0.000000000
[2,] 1 3 0.000000000
[3,] 1 4 0.000000000
[4,] 1 5 0.000000000
[5,] 1 6 0.000000000
[6,] 1 7 0.000000000
[7,] 1 8 0.000000000
[8,] 1 9 0.000000000
[9,] 1 10 0.000000000
[10,] 1 11 0.000000000
[11,] 1 12 0.000000000
[12,] 1 13 0.000000000
[13,] 1 14 0.000000000
[14,] 1 15 0.000000000
[15,] 1 16 0.000000000
[16,] 1 17 0.000000000
[17,] 1 18 0.000000000
[18,] 1 19 0.000000000
[19,] 1 20 0.000000000
[20,] 1 21 0.000000000
[21,] 1 22 0.000000000
[22,] 1 23 0.000000000
[23,] 1 24 0.000000000
[24,] 1 25 0.000000000
[25,] 1 26 0.000000000
[26,] 1 27 0.000000000
[27,] 1 28 0.000000000
[28,] 1 29 0.000000000
[29,] 2 3 0.000000000
[30,] 2 4 0.000000000
[31,] 2 5 0.000000000
[32,] 2 6 0.015625000
[33,] 2 7 0.000000000
[34,] 2 8 0.000000000
[35,] 2 9 0.000000000
[36,] 2 10 0.000000000
[37,] 2 11 0.000000000
[38,] 2 12 0.000000000
[39,] 2 13 0.000000000
[40,] 2 14 0.222222222
[41,] 2 15 0.000000000
[42,] 2 16 0.040000000
[43,] 2 17 0.000000000
[44,] 2 18 0.000000000
[45,] 2 19 0.000000000
[46,] 2 20 0.000000000
[47,] 2 21 0.000000000
[48,] 2 22 0.000000000
[49,] 2 23 0.000000000
[50,] 2 24 0.000000000
[51,] 2 25 0.153846154
[52,] 2 26 0.000000000
[53,] 2 27 0.061224490
[54,] 2 28 0.000000000
[55,] 2 29 0.000000000
[56,] 3 4 0.000000000
[57,] 3 5 0.000000000
[58,] 3 6 0.016393443
[59,] 3 7 0.000000000
[60,] 3 8 0.000000000
[61,] 3 9 0.000000000
[62,] 3 10 0.000000000
[63,] 3 11 0.000000000
[64,] 3 12 0.000000000
[65,] 3 13 0.000000000
[66,] 3 14 0.000000000
[67,] 3 15 0.000000000
[68,] 3 16 0.000000000
[69,] 3 17 0.000000000
[70,] 3 18 0.000000000
[71,] 3 19 0.000000000
[72,] 3 20 0.000000000
[73,] 3 21 0.000000000
[74,] 3 22 0.000000000
[75,] 3 23 0.000000000
[76,] 3 24 0.000000000
[77,] 3 25 0.000000000
[78,] 3 26 0.000000000
[79,] 3 27 0.042553191
[80,] 3 28 0.000000000
[81,] 3 29 0.000000000
[82,] 4 5 0.000000000
[83,] 4 6 0.000000000
[84,] 4 7 0.000000000
[85,] 4 8 0.000000000
[86,] 4 9 0.000000000
[87,] 4 10 0.000000000
[88,] 4 11 0.000000000
[89,] 4 12 0.000000000
[90,] 4 13 0.000000000
[91,] 4 14 0.000000000
[92,] 4 15 0.000000000
[93,] 4 16 0.000000000
[94,] 4 17 0.000000000
[95,] 4 18 0.000000000
[96,] 4 19 0.000000000
[97,] 4 20 0.000000000
[98,] 4 21 0.000000000
[99,] 4 22 0.000000000
[100,] 4 23 0.000000000
[101,] 4 24 0.000000000
[102,] 4 25 0.000000000
[103,] 4 26 0.000000000
[104,] 4 27 0.000000000
[105,] 4 28 0.000000000
[106,] 4 29 0.000000000
[107,] 5 6 0.000000000
[108,] 5 7 0.000000000
[109,] 5 8 0.000000000
[110,] 5 9 0.000000000
[111,] 5 10 0.000000000
[112,] 5 11 0.000000000
[113,] 5 12 0.000000000
[114,] 5 13 0.000000000
[115,] 5 14 0.000000000
[116,] 5 15 0.000000000
[117,] 5 16 0.000000000
[118,] 5 17 0.000000000
[119,] 5 18 0.000000000
[120,] 5 19 0.000000000
[121,] 5 20 0.000000000
[122,] 5 21 0.000000000
[123,] 5 22 0.000000000
[124,] 5 23 0.000000000
[125,] 5 24 0.000000000
[126,] 5 25 0.000000000
[127,] 5 26 0.000000000
[128,] 5 27 0.000000000
[129,] 5 28 0.000000000
[130,] 5 29 0.000000000
[131,] 6 7 0.000000000
[132,] 6 8 0.000000000
[133,] 6 9 0.031250000
[134,] 6 10 0.016393443
[135,] 6 11 0.000000000
[136,] 6 12 0.026548673
[137,] 6 13 0.014285714
[138,] 6 14 0.000000000
[139,] 6 15 0.000000000
[140,] 6 16 0.094594595
[141,] 6 17 0.088888889
[142,] 6 18 0.010526316
[143,] 6 19 0.048387097
[144,] 6 20 0.000000000
[145,] 6 21 0.000000000
[146,] 6 22 0.076923077
[147,] 6 23 0.014925373
[148,] 6 24 0.026315789
[149,] 6 25 0.029411765
[150,] 6 26 0.000000000
[151,] 6 27 0.103092784
[152,] 6 28 0.140625000
[153,] 6 29 0.015151515
[154,] 7 8 0.000000000
[155,] 7 9 0.000000000
[156,] 7 10 0.000000000
[157,] 7 11 0.000000000
[158,] 7 12 0.000000000
[159,] 7 13 0.000000000
[160,] 7 14 0.000000000
[161,] 7 15 0.000000000
[162,] 7 16 0.000000000
[163,] 7 17 0.000000000
[164,] 7 18 0.000000000
[165,] 7 19 0.000000000
[166,] 7 20 0.000000000
[167,] 7 21 0.000000000
[168,] 7 22 0.000000000
[169,] 7 23 0.000000000
[170,] 7 24 0.000000000
[171,] 7 25 0.000000000
[172,] 7 26 0.000000000
[173,] 7 27 0.000000000
[174,] 7 28 0.000000000
[175,] 7 29 0.000000000
[176,] 8 9 0.000000000
[177,] 8 10 0.000000000
[178,] 8 11 0.000000000
[179,] 8 12 0.000000000
[180,] 8 13 0.000000000
[181,] 8 14 0.000000000
[182,] 8 15 0.000000000
[183,] 8 16 0.000000000
[184,] 8 17 0.000000000
[185,] 8 18 0.021276596
[186,] 8 19 0.000000000
[187,] 8 20 0.000000000
[188,] 8 21 0.000000000
[189,] 8 22 0.047619048
[190,] 8 23 0.000000000
[191,] 8 24 0.034482759
[192,] 8 25 0.000000000
[193,] 8 26 0.000000000
[194,] 8 27 0.000000000
[195,] 8 28 0.000000000
[196,] 8 29 0.000000000
[197,] 9 10 0.000000000
[198,] 9 11 0.000000000
[199,] 9 12 0.016393443
[200,] 9 13 0.000000000
[201,] 9 14 0.000000000
[202,] 9 15 0.000000000
[203,] 9 16 0.038461538
[204,] 9 17 0.023255814
[205,] 9 18 0.000000000
[206,] 9 19 0.000000000
[207,] 9 20 0.000000000
[208,] 9 21 0.000000000
[209,] 9 22 0.000000000
[210,] 9 23 0.000000000
[211,] 9 24 0.043478261
[212,] 9 25 0.000000000
[213,] 9 26 0.000000000
[214,] 9 27 0.000000000
[215,] 9 28 0.000000000
[216,] 9 29 0.012658228
[217,] 10 11 0.000000000
[218,] 10 12 0.000000000
[219,] 10 13 0.000000000
[220,] 10 14 0.000000000
[221,] 10 15 0.000000000
[222,] 10 16 0.000000000
[223,] 10 17 0.000000000
[224,] 10 18 0.000000000
[225,] 10 19 0.166666667
[226,] 10 20 0.000000000
[227,] 10 21 0.000000000
[228,] 10 22 0.090909091
[229,] 10 23 0.000000000
[230,] 10 24 0.000000000
[231,] 10 25 0.000000000
[232,] 10 26 0.000000000
[233,] 10 27 0.020833333
[234,] 10 28 0.000000000
[235,] 10 29 0.000000000
[236,] 11 12 0.000000000
[237,] 11 13 0.000000000
[238,] 11 14 0.000000000
[239,] 11 15 0.000000000
[240,] 11 16 0.000000000
[241,] 11 17 0.000000000
[242,] 11 18 0.000000000
[243,] 11 19 0.000000000
[244,] 11 20 0.000000000
[245,] 11 21 0.000000000
[246,] 11 22 0.000000000
[247,] 11 23 0.000000000
[248,] 11 24 0.000000000
[249,] 11 25 0.000000000
[250,] 11 26 0.000000000
[251,] 11 27 0.000000000
[252,] 11 28 0.000000000
[253,] 11 29 0.000000000
[254,] 12 13 0.000000000
[255,] 12 14 0.016393443
[256,] 12 15 0.000000000
[257,] 12 16 0.013157895
[258,] 12 17 0.032967033
[259,] 12 18 0.000000000
[260,] 12 19 0.000000000
[261,] 12 20 0.031746032
[262,] 12 21 0.000000000
[263,] 12 22 0.000000000
[264,] 12 23 0.015873016
[265,] 12 24 0.000000000
[266,] 12 25 0.015384615
[267,] 12 26 0.000000000
[268,] 12 27 0.000000000
[269,] 12 28 0.000000000
[270,] 12 29 0.023622047
[271,] 13 14 0.000000000
[272,] 13 15 0.000000000
[273,] 13 16 0.103448276
[274,] 13 17 0.289473684
[275,] 13 18 0.021739130
[276,] 13 19 0.000000000
[277,] 13 20 0.000000000
[278,] 13 21 0.000000000
[279,] 13 22 0.000000000
[280,] 13 23 0.117647059
[281,] 13 24 0.000000000
[282,] 13 25 0.000000000
[283,] 13 26 0.055555556
[284,] 13 27 0.074074074
[285,] 13 28 0.043478261
[286,] 13 29 0.000000000
[287,] 14 15 0.000000000
[288,] 14 16 0.000000000
[289,] 14 17 0.000000000
[290,] 14 18 0.000000000
[291,] 14 19 0.000000000
[292,] 14 20 0.000000000
[293,] 14 21 0.000000000
[294,] 14 22 0.000000000
[295,] 14 23 0.000000000
[296,] 14 24 0.000000000
[297,] 14 25 0.000000000
[298,] 14 26 0.000000000
[299,] 14 27 0.019230769
[300,] 14 28 0.000000000
[301,] 14 29 0.000000000
[302,] 15 16 0.000000000
[303,] 15 17 0.000000000
[304,] 15 18 0.000000000
[305,] 15 19 0.000000000
[306,] 15 20 0.000000000
[307,] 15 21 0.000000000
[308,] 15 22 0.000000000
[309,] 15 23 0.000000000
[310,] 15 24 0.000000000
[311,] 15 25 0.000000000
[312,] 15 26 0.000000000
[313,] 15 27 0.000000000
[314,] 15 28 0.000000000
[315,] 15 29 0.000000000
[316,] 16 17 0.113207547
[317,] 16 18 0.036363636
[318,] 16 19 0.040000000
[319,] 16 20 0.000000000
[320,] 16 21 0.000000000
[321,] 16 22 0.000000000
[322,] 16 23 0.035714286
[323,] 16 24 0.083333333
[324,] 16 25 0.033333333
[325,] 16 26 0.035714286
[326,] 16 27 0.096774194
[327,] 16 28 0.062500000
[328,] 16 29 0.021505376
[329,] 17 18 0.013698630
[330,] 17 19 0.023809524
[331,] 17 20 0.000000000
[332,] 17 21 0.000000000
[333,] 17 22 0.000000000
[334,] 17 23 0.045454545
[335,] 17 24 0.056603774
[336,] 17 25 0.000000000
[337,] 17 26 0.022222222
[338,] 17 27 0.103896104
[339,] 17 28 0.040816327
[340,] 17 29 0.009009009
[341,] 18 19 0.025000000
[342,] 18 20 0.071428571
[343,] 18 21 0.000000000
[344,] 18 22 0.000000000
[345,] 18 23 0.023255814
[346,] 18 24 0.000000000
[347,] 18 25 0.000000000
[348,] 18 26 0.000000000
[349,] 18 27 0.037500000
[350,] 18 28 0.020833333
[351,] 18 29 0.009174312
[352,] 19 20 0.000000000
[353,] 19 21 0.000000000
[354,] 19 22 0.153846154
[355,] 19 23 0.000000000
[356,] 19 24 0.045454545
[357,] 19 25 0.000000000
[358,] 19 26 0.000000000
[359,] 19 27 0.061224490
[360,] 19 28 0.058823529
[361,] 19 29 0.000000000
[362,] 20 21 0.000000000
[363,] 20 22 0.000000000
[364,] 20 23 0.000000000
[365,] 20 24 0.000000000
[366,] 20 25 0.000000000
[367,] 20 26 0.000000000
[368,] 20 27 0.000000000
[369,] 20 28 0.000000000
[370,] 20 29 0.012195122
[371,] 21 22 0.000000000
[372,] 21 23 0.000000000
[373,] 21 24 0.000000000
[374,] 21 25 0.000000000
[375,] 21 26 0.000000000
[376,] 21 27 0.000000000
[377,] 21 28 0.000000000
[378,] 21 29 0.000000000
[379,] 22 23 0.000000000
[380,] 22 24 0.000000000
[381,] 22 25 0.000000000
[382,] 22 26 0.000000000
[383,] 22 27 0.036363636
[384,] 22 28 0.045454545
[385,] 22 29 0.000000000
[386,] 23 24 0.000000000
[387,] 23 25 0.058823529
[388,] 23 26 0.066666667
[389,] 23 27 0.057692308
[390,] 23 28 0.050000000
[391,] 23 29 0.012345679
[392,] 24 25 0.000000000
[393,] 24 26 0.000000000
[394,] 24 27 0.015625000
[395,] 24 28 0.033333333
[396,] 24 29 0.000000000
[397,] 25 26 0.000000000
[398,] 25 27 0.055555556
[399,] 25 28 0.045454545
[400,] 25 29 0.012048193
[401,] 26 27 0.037735849
[402,] 26 28 0.000000000
[403,] 26 29 0.000000000
[404,] 27 28 0.034482759
[405,] 27 29 0.016806723
[406,] 28 29 0.000000000
