# Supplementary material for: Network medicine framework identified drug-repurposing opportunities of pharmaco-active compounds of Angelica acutiloba (Siebold & Zucc.) Kitag. for skin aging
Source: Aging (Albany NY). 2023 Jun 12;15(11):5144–63. doi: 10.18632/aging.204789 (PMC10292898; doi:10.18632/aging.204789)
Supplement: Supplementary Table 4 [file aging-15-204789-s004.xlsx]

## Sheet: Sheet1
Supplementary Table 4. PPI analysis of AAK compound targets to skin aging proteins.
disease	entrez_id
skin aging	4312
skin aging	2006
skin aging	8724
skin aging	4015
skin aging	7048
skin aging	4157
skin aging	2200
skin aging	6657
skin aging	4087
skin aging	4092
skin aging	3479
skin aging	5468
skin aging	3868
skin aging	1464
skin aging	2100
skin aging	1382
skin aging	9759
skin aging	7431
skin aging	362
skin aging	7076
skin aging	3872
skin aging	2852
skin aging	5728
skin aging	3371
skin aging	10631
skin aging	1545
skin aging	2247
skin aging	10252
skin aging	4239
skin aging	10062
skin aging	5478
skin aging	682
skin aging	4311
skin aging	71
skin aging	857
skin aging	10376
skin aging	3688
skin aging	3037
skin aging	4314
skin aging	5610
skin aging	1136
skin aging	3662
skin aging	4016
skin aging	54796
skin aging	948
skin aging	4318
skin aging	3491
skin aging	8626
skin aging	5176
skin aging	7157
skin aging	847
skin aging	2043
skin aging	3984
skin aging	5587
skin aging	779
skin aging	2175
skin aging	4214
skin aging	410
skin aging	717
skin aging	5598
skin aging	5618
skin aging	5795
skin aging	5903
skin aging	387
skin aging	6584
skin aging	7139
skin aging	1743
skin aging	2255
skin aging	3105
skin aging	4629
skin aging	4722
skin aging	8974
skin aging	5077
skin aging	5286
skin aging	860
skin aging	10507
skin aging	7227
skin aging	2202
skin aging	8892
skin aging	3107
skin aging	6583
skin aging	10253
skin aging	80326
skin aging	1120
skin aging	81704
skin aging	2018
skin aging	3992
skin aging	9415
skin aging	8091
skin aging	4254
skin aging	5351
skin aging	639
skin aging	25797
skin aging	10057
skin aging	56052
skin aging	9474
skin aging	1138
skin aging	53405
skin aging	9785
skin aging	10056
skin aging	3398
skin aging	4948
skin aging	5225
skin aging	5685
skin aging	153201
skin aging	64116
skin aging	6716
skin aging	6733
skin aging	164
skin aging	84733
skin aging	1437
skin aging	668
skin aging	23189
skin aging	3975
skin aging	27030
skin aging	27249
skin aging	56945
skin aging	10651
skin aging	10
skin aging	54820
skin aging	8504
skin aging	5228
skin aging	5317
skin aging	5361
skin aging	5550
skin aging	5396
skin aging	5913
skin aging	8698
skin aging	166378
skin aging	117581
skin aging	26137
skin aging	11173
skin aging	9590
skin aging	8874
skin aging	23200
skin aging	23774
skin aging	8535
skin aging	1381
skin aging	10913
skin aging	80153
skin aging	2519
skin aging	51343
skin aging	2769
skin aging	57498
skin aging	8685
skin aging	4277
skin aging	10933
skin aging	51588
skin aging	5893
skin aging	5923
skin aging	390
skin aging	6119
skin aging	25769
skin aging	7504
skin aging	79174
skin aging	2019
skin aging	3250
skin aging	166785
skin aging	4782
skin aging	8572
skin aging	23035
skin aging	22841
skin aging	8464
skin aging	23093
skin aging	8165
skin aging	57018
skin aging	10602
skin aging	22905
skin aging	23295
skin aging	4300
skin aging	4925
skin aging	55328
skin aging	81846
skin aging	51151
skin aging	23224
skin aging	8887
skin aging	201633
skin aging	25890
skin aging	97
skin aging	11216
skin aging	57332
skin aging	10658
skin aging	253782
skin aging	54206
skin aging	342184
skin aging	113263
skin aging	9798
skin aging	221895
skin aging	3898
skin aging	431707
skin aging	7795
skin aging	51072
skin aging	4289
skin aging	29781
skin aging	11162
skin aging	23654
skin aging	23362
skin aging	22913
skin aging	221035
skin aging	22980
skin aging	7571
skin aging	51665
skin aging	54875
skin aging	9648
skin aging	3671
skin aging	54602
skin aging	51070
skin aging	79641
skin aging	29855
skin aging	25862
skin aging	55689
skin aging	27077
skin aging	54800
skin aging	89857
skin aging	254251
skin aging	115294
skin aging	399694
skin aging	116984
skin aging	54622
skin aging	201134
skin aging	84303
skin aging	166012
skin aging	54849
skin aging	83475
skin aging	2005
skin aging	10817
skin aging	84656
skin aging	10362
skin aging	91156
skin aging	129642
skin aging	23101
skin aging	9258
skin aging	126321
skin aging	133522
skin aging	137902
skin aging	7732
skin aging	83694
skin aging	84501
skin aging	9399
skin aging	23051
skin aging	55565
skin aging	79364
skin aging	134637
skin aging	342371
skin aging	27319
skin aging	10944
skin aging	1797
skin aging	56169
skin aging	135458
skin aging	91862
skin aging	153443
skin aging	25976
skin aging	221527
skin aging	114900
skin aging	285527
skin aging	8934
skin aging	113174
skin aging	9717
skin aging	285641
skin aging	79696
skin aging	165055
skin aging	389170
skin aging	374383
skin aging	389090
skin aging	283571
skin aging	375287
skin aging	7979
skin aging	50651
skin aging	85460
skin aging	57184
skin aging	123688
skin aging	342372
skin aging	5639
skin aging	55076
skin aging	283971
skin aging	401124
skin aging	647219
skin aging	283677
skin aging	124404
skin aging	55765
skin aging	130540
skin aging	80133
skin aging	157285
skin aging	284422
skin aging	123811
skin aging	148808
skin aging	401089
skin aging	389152
skin aging	100287171
skin aging	440335
skin aging	100128569
skin aging	729852
skin aging	2310
skin aging	392288
skin aging	1277
skin aging	7040
skin aging	5743
skin aging	360
skin aging	1786
skin aging	4780
skin aging	1991
skin aging	5914
skin aging	3725
skin aging	3713
skin aging	654
skin aging	1634
skin aging	7421
skin aging	9365
skin aging	6696
skin aging	5602
skin aging	8372
skin aging	6647
skin aging	2312
skin aging	4014
skin aging	5594
skin aging	2720
skin aging	1490
skin aging	2353
skin aging	5080
skin aging	5015
skin aging	338917
skin aging	30062
skin aging	1029
skin aging	1958
skin aging	4313
skin aging	3290
skin aging	4088
skin aging	3569
skin aging	1462
skin aging	3553
skin aging	3552
skin aging	1026
skin aging	2171
skin aging	1956
skin aging	177
skin aging	1080
skin aging	1281
skin aging	2199
skin aging	7015
skin aging	4000
skin aging	4089
skin aging	1278
skin aging	4316
skin aging	8692
skin aging	4482
skin aging	51734
skin aging	5111
skin aging	5173
skin aging	51548
skin aging	4237
skin aging	3082
skin aging	4322
skin aging	4001
skin aging	4321
skin aging	7442
skin aging	5831
skin aging	1896
skin aging	5266
skin aging	31
skin aging	10891
skin aging	1730
skin aging	3751
skin aging	9695
skin aging	6279
skin aging	10721
skin aging	10495
skin aging	57113
skin aging	51725
skin aging	9515
skin aging	249
skin aging	846
skin aging	1576
skin aging	213
skin aging	5167
skin aging	1593
skin aging	1594
skin aging	1591
skin aging	2184
skin aging	250
skin aging	120227
skin aging	8074
skin aging	2638
skin aging	5741
skin aging	4952
skin aging	1184
skin aging	1758
skin aging	5251
skin aging	6569
skin aging	142680
skin aging	632
skin aging	1834
skin aging	56955
skin aging	102724539
skin aging	137196
skin aging	101927195
skin aging	102464827
skin aging	730091
skin aging	105377922
skin aging	105827617
skin aging	100131117
skin aging	100270679
skin aging	100128033
skin aging	401014
skin aging	55871
skin aging	105373962
skin aging	645207
skin aging	105375591
skin aging	728084
skin aging	102724627
skin aging	347689
skin aging	101929231
skin aging	105616981
skin aging	106479867
skin aging	100271380
