# Supplementary material for: Network medicine framework identified drug-repurposing opportunities of pharmaco-active compounds of Angelica acutiloba (Siebold & Zucc.) Kitag. for skin aging
Source: Aging (Albany NY). 2023 Jun 12;15(11):5144–63. doi: 10.18632/aging.204789 (PMC10292898; doi:10.18632/aging.204789)
Supplement: Supplementary Table 7 [file aging-15-204789-s006.xlsx]

## Sheet: Sheet1
Supplementary Table 7. Network proximity analysis of known and unknown association in AAK validated.
disease	n_mapped_disease	n_mapped_chemical	chemical	shortest	closest	z_shortest	z_closest
Anemia, Aplastic	126	6	folinic acid	2.59524	2.16667	-0.967072	2.05439	therapeutic
Burkitt Lymphoma	64	6	folinic acid	2.64062	2.16667	0.0200721	1.9206	therapeutic
Bone Neoplasms	262	6	folinic acid	2.62214	1.83333	-0.507284	1.36984	therapeutic
Colorectal Neoplasms	154	6	folinic acid	2.52165	1.83333	-0.884914	0.977519	therapeutic
Gastrointestinal Neoplasms	108	6	folinic acid	2.49228	1.83333	-1.12947	0.727542	therapeutic
Gallbladder Neoplasms	67	6	folinic acid	2.45522	1.83333	-1.01319	0.378175	therapeutic
Glioma	11	6	folinic acid	2.42424	2.16667	-0.339385	1.22928	therapeutic
Breast Neoplasms	211	6	folinic acid	2.52607	1.83333	-0.902992	1.39135	therapeutic
Breast Neoplasms	211	9	limonene	2.22591	1.22222	-1.94636	-0.310211	therapeutic
Hodgkin Disease	201	6	folinic acid	2.58375	1.83333	-0.766099	1.00712	therapeutic
Hyperglycemia	4	2	isoquercitrin	2.875	2.5	1.06661	0.801324	therapeutic
Influenza, Human	33	2	isoquercitrin	2.65152	2	1.51036	0.692851	therapeutic
Intestinal Neoplasms	173	6	folinic acid	2.56551	1.66667	-0.868433	0.14646	therapeutic
Liver Cirrhosis	111	9	limonene	2.37838	1.22222	-1.76473	-2.14018	therapeutic
Lymphoma	39	6	folinic acid	2.61111	2.16667	0.0160959	1.63575	therapeutic
Lung Neoplasms	240	6	folinic acid	2.56042	1.83333	-0.779254	1.42618	therapeutic
Lung Neoplasms	240	9	limonene	2.2537	1.11111	-1.56167	-0.791289	therapeutic
Liver Neoplasms	181	6	folinic acid	2.57551	1.66667	-0.851918	0.208428	therapeutic
Liver Neoplasms	181	9	limonene	2.26458	1.22222	-1.57251	-0.536454	therapeutic
Mammary Neoplasms, Animal	138	9	limonene	2.19324	1.22222	-1.51328	-0.523687	therapeutic
Malaria, Falciparum	23	6	folinic acid	2.80435	2.16667	0.404624	0.555591	therapeutic
Medulloblastoma	8	6	folinic acid	2.5625	2.33333	0.0511465	1.90173	therapeutic
Neoplasms, Mesothelial	40	9	limonene	2.07222	1.55556	-1.77007	0.651641	therapeutic
Osteosarcoma	6	6	folinic acid	2.38889	2.33333	-0.470954	1.86823	therapeutic
Parotid Neoplasms	41	6	folinic acid	2.35772	1.83333	-0.776997	0.203279	therapeutic
Pancreatic Neoplasms	161	6	folinic acid	2.59317	1.83333	-0.654065	0.944945	therapeutic
Pancreatic Neoplasms	161	9	limonene	2.29883	1.22222	-1.4481	-0.620441	therapeutic
Paresis	1	6	folinic acid	2.5	2.5	-0.875062	-0.875062	therapeutic
Prostatic Neoplasms	157	9	limonene	2.24558	1.22222	-1.63443	-0.591062	therapeutic
Precursor Cell Lymphoblastic Le	649	6	folinic acid	2.58963	1	-0.571425	-1.56386	therapeutic
Seizures	67	6	folinic acid	2.77363	2.16667	-0.489633	1.14018	therapeutic
Stomach Ulcer	45	9	limonene	2.28395	1.55556	-1.47904	0.0122935	therapeutic
Stomach Neoplasms	116	6	folinic acid	2.48276	1.83333	-0.964629	0.777466	therapeutic
Stomach Neoplasms	116	9	limonene	2.19636	1.44444	-1.53666	0.823342	therapeutic
Squamous Cell Carcinoma of Head	1391	6	folinic acid	2.61251	1.33333	-1.04457	0.912723	therapeutic
Soft Tissue Neoplasms	229	6	folinic acid	2.53785	1.5	-0.801081	-0.318712	therapeutic
Skin Neoplasms	240	9	limonene	2.25509	1.22222	-1.72404	-0.0714668	therapeutic
Sigmoid Neoplasms	55	6	folinic acid	2.39091	1.83333	-0.98004	0.26149	therapeutic
Uterine Neoplasms	87	6	folinic acid	2.44828	1.83333	-0.80388	0.677468	therapeutic
Urinary Bladder Neoplasms	228	6	folinic acid	2.58553	1.83333	-0.621082	1.39481	therapeutic
Anemia, Aplastic	126	1	camphene	2.1746	2	-0.845427	1.54715	no therapeutic
Anemia, Aplastic	126	8	cyclohexane	2.34921	1.75	-2.6776	0.969051	no therapeutic
Anemia, Aplastic	126	26	indole	2.634	1.76923	-0.123741	0.914756	no therapeutic
Anemia, Aplastic	126	2	isoquercitrin	2.56349	1	0.93624	-1.57053	no therapeutic
Anemia, Aplastic	126	9	limonene	2.28571	1.33333	-1.93329	-0.78262	no therapeutic
Anemia, Aplastic	126	73	stearic acid	2.38552	1.67123	-2.60248	2.96413	no therapeutic
Adenoma	12	3	alpha-pinene	2.44444	2	1.19394	0.617301	no therapeutic
Adenoma	12	1	camphene	2.25	2	0.580815	0.478018	no therapeutic
Adenoma	12	8	cyclohexane	2.29167	2.125	-1.3112	1.26692	no therapeutic
Adenoma	12	6	folinic acid	2.61111	2.33333	0.408938	2.07937	no therapeutic
Adenoma	12	26	indole	2.55769	1.92308	0.931554	-0.593514	no therapeutic
Adenoma	12	2	isoquercitrin	2.45833	2	0.799786	0.430559	no therapeutic
Adenoma	12	9	limonene	2.22222	1.66667	-0.702029	-1.04444	no therapeutic
Adenoma	12	73	stearic acid	2.32306	1.83562	0.00980125	-0.293975	no therapeutic
Adenocarcinoma of Lung	163	3	alpha-pinene	2.47853	1.33333	1.1364	0.277208	no therapeutic
Adenocarcinoma of Lung	163	1	camphene	2.16564	1	-0.596318	-0.280739	no therapeutic
Adenocarcinoma of Lung	163	8	cyclohexane	2.31748	1.125	-2.33269	-1.82413	no therapeutic
Adenocarcinoma of Lung	163	6	folinic acid	2.56851	1.83333	-0.875918	0.943186	no therapeutic
Adenocarcinoma of Lung	163	26	indole	2.56324	1.53846	-0.63045	-0.122913	no therapeutic
Adenocarcinoma of Lung	163	2	isoquercitrin	2.43252	1	0.256361	-1.11015	no therapeutic
Adenocarcinoma of Lung	163	9	limonene	2.25494	1.22222	-1.77511	-0.603803	no therapeutic
Adenocarcinoma of Lung	163	73	stearic acid	2.32188	1.28767	-3.50968	-0.822168	no therapeutic
Adenoviridae Infections	29	3	alpha-pinene	2.55172	2	1.95037	1.21626	no therapeutic
Adenoviridae Infections	29	1	camphene	2.31034	2	0.628937	0.768001	no therapeutic
Adenoviridae Infections	29	8	cyclohexane	2.41379	1.625	-0.634231	-1.25774	no therapeutic
Adenoviridae Infections	29	6	folinic acid	2.68966	2.16667	0.736887	1.42821	no therapeutic
Adenoviridae Infections	29	26	indole	2.5756	1.84615	0.330023	-0.406274	no therapeutic
Adenoviridae Infections	29	2	isoquercitrin	2.51724	2	0.926925	0.814441	no therapeutic
Adenoviridae Infections	29	9	limonene	2.31801	1.55556	-0.0877547	-0.581402	no therapeutic
Adenoviridae Infections	29	73	stearic acid	2.36656	1.71233	-0.387732	-0.556872	no therapeutic
Arthritis, Psoriatic	48	3	alpha-pinene	2.60417	2	1.59304	0.847128	no therapeutic
Arthritis, Psoriatic	48	1	camphene	2.45833	2	0.895865	0.560411	no therapeutic
Arthritis, Psoriatic	48	8	cyclohexane	2.53125	1.875	-0.492747	-0.239347	no therapeutic
Arthritis, Psoriatic	48	6	folinic acid	2.80556	2.16667	0.886245	1.25255	no therapeutic
Arthritis, Psoriatic	48	26	indole	2.70112	2	0.798377	0.601056	no therapeutic
Arthritis, Psoriatic	48	2	isoquercitrin	2.625	2	1.0622	0.633807	no therapeutic
Arthritis, Psoriatic	48	9	limonene	2.40972	1.88889	-0.282741	1.31348	no therapeutic
Arthritis, Psoriatic	48	73	stearic acid	2.50685	1.79452	0.915934	-0.248853	no therapeutic
Atherosclerosis	5	3	alpha-pinene	2.4	2	0.414982	-0.450816	no therapeutic
Atherosclerosis	5	1	camphene	2	2	-0.866787	0.131113	no therapeutic
Atherosclerosis	5	8	cyclohexane	2.275	2.125	-1.65478	-0.329272	no therapeutic
Atherosclerosis	5	6	folinic acid	2.33333	2	-2.21942	-1.7518	no therapeutic
Atherosclerosis	5	26	indole	2.6	2.42308	0.386645	1.77753	no therapeutic
Atherosclerosis	5	2	isoquercitrin	2.6	2	1.07441	-0.348746	no therapeutic
Atherosclerosis	5	9	limonene	2.2	1.77778	-1.30494	-2.20762	no therapeutic
Atherosclerosis	5	73	stearic acid	2.2137	1.83562	-2.43291	-6.0989	no therapeutic
Alzheimer Disease	314	3	alpha-pinene	2.46709	1	0.925097	-0.994314	no therapeutic
Alzheimer Disease	314	1	camphene	2.20064	1	-0.43636	-0.0237238	no therapeutic
Alzheimer Disease	314	8	cyclohexane	2.33081	1	-2.37109	-2.03473	no therapeutic
Alzheimer Disease	314	6	folinic acid	2.57006	1.5	-0.957141	-0.194678	no therapeutic
Alzheimer Disease	314	26	indole	2.58721	1.07692	-0.5317	-4.42091	no therapeutic
Alzheimer Disease	314	2	isoquercitrin	2.5207	1	0.872836	-0.699746	no therapeutic
Alzheimer Disease	314	9	limonene	2.27141	0.555556	-2.02784	-5.03791	no therapeutic
Alzheimer Disease	314	73	stearic acid	2.34116	1.0411	-3.64561	-3.93148	no therapeutic
Bipolar Disorder	132	3	alpha-pinene	2.60101	1.66667	1.02245	0.736881	no therapeutic
Bipolar Disorder	132	1	camphene	2.37879	1	-0.0137097	-0.601944	no therapeutic
Bipolar Disorder	132	8	cyclohexane	2.47633	1.375	-2.25461	-1.67186	no therapeutic
Bipolar Disorder	132	6	folinic acid	2.74874	2	-0.22256	0.983753	no therapeutic
Bipolar Disorder	132	26	indole	2.69522	1.65385	-0.723099	-0.762123	no therapeutic
Bipolar Disorder	132	2	isoquercitrin	2.625	2	0.667662	1.35068	no therapeutic
Bipolar Disorder	132	9	limonene	2.37458	1.44444	-2.07371	-0.229856	no therapeutic
Bipolar Disorder	132	73	stearic acid	2.4754	1.28767	-2.63285	-3.9781	no therapeutic
Burkitt Lymphoma	64	3	alpha-pinene	2.49479	2	1.25653	1.92817	no therapeutic
Burkitt Lymphoma	64	1	camphene	2.26562	2	0.324494	1.2355	no therapeutic
Burkitt Lymphoma	64	8	cyclohexane	2.40234	1.375	-1.16121	-1.87915	no therapeutic
Burkitt Lymphoma	64	26	indole	2.60337	1.76923	0.325617	0.159443	no therapeutic
Burkitt Lymphoma	64	2	isoquercitrin	2.44531	1.5	0.337731	-0.375655	no therapeutic
Burkitt Lymphoma	64	9	limonene	2.31597	1.44444	-0.571501	-0.39142	no therapeutic
Burkitt Lymphoma	64	73	stearic acid	2.36494	1.61644	-1.16606	0.863666	no therapeutic
Bowen's Disease	32	3	alpha-pinene	2.40625	1.66667	0.980055	0.114348	no therapeutic
Bowen's Disease	32	1	camphene	2.125	1	-0.248523	-0.987306	no therapeutic
Bowen's Disease	32	8	cyclohexane	2.29297	1.875	-1.61793	0.55666	no therapeutic
Bowen's Disease	32	6	folinic acid	2.5625	2	-0.0827197	0.579907	no therapeutic
Bowen's Disease	32	26	indole	2.53245	1.84615	0.249546	0.139687	no therapeutic
Bowen's Disease	32	2	isoquercitrin	2.4375	2	0.695576	0.928877	no therapeutic
Bowen's Disease	32	9	limonene	2.21181	1.33333	-1.04167	-1.71993	no therapeutic
Bowen's Disease	32	73	stearic acid	2.26627	1.53425	-2.21663	-2.01409	no therapeutic
Bone Neoplasms	262	3	alpha-pinene	2.49873	1	1.02897	-1.15757	no therapeutic
Bone Neoplasms	262	1	camphene	2.23282	1	-0.350063	-0.128859	no therapeutic
Bone Neoplasms	262	8	cyclohexane	2.37739	1.125	-1.92142	-1.48508	no therapeutic
Bone Neoplasms	262	26	indole	2.61318	1.42308	-0.102362	-0.716053	no therapeutic
Bone Neoplasms	262	2	isoquercitrin	2.5	1	0.592881	-0.855886	no therapeutic
Bone Neoplasms	262	9	limonene	2.3134	1.22222	-1.21488	-0.114149	no therapeutic
Bone Neoplasms	262	73	stearic acid	2.36934	1.19178	-2.74716	-1.3913	no therapeutic
Cataract	47	3	alpha-pinene	2.71631	1.33333	1.60048	-1.6146	no therapeutic
Cataract	47	1	camphene	2.55319	2	0.872973	0.692308	no therapeutic
Cataract	47	8	cyclohexane	2.68085	1.75	-0.0461852	-0.640886	no therapeutic
Cataract	47	6	folinic acid	2.92199	2	1.12146	0.258154	no therapeutic
Cataract	47	26	indole	2.90835	2	2.61572	1.07775	no therapeutic
Cataract	47	2	isoquercitrin	2.74468	2	1.19423	0.783083	no therapeutic
Cataract	47	9	limonene	2.63357	1.88889	1.62537	1.64625	no therapeutic
Cataract	47	73	stearic acid	2.67823	1.75342	2.40756	-0.056296	no therapeutic
Colorectal Neoplasms	154	3	alpha-pinene	2.4697	1.66667	1.34084	1.75904	no therapeutic
Colorectal Neoplasms	154	1	camphene	2.11688	1	-0.702007	-0.319887	no therapeutic
Colorectal Neoplasms	154	8	cyclohexane	2.28571	1.375	-2.2796	-0.382797	no therapeutic
Colorectal Neoplasms	154	26	indole	2.5457	1.5	-0.449054	-0.658894	no therapeutic
Colorectal Neoplasms	154	2	isoquercitrin	2.40584	1.5	0.280217	0.556247	no therapeutic
Colorectal Neoplasms	154	9	limonene	2.23088	1.22222	-1.7345	-0.595382	no therapeutic
Colorectal Neoplasms	154	73	stearic acid	2.29843	1.30137	-3.17942	-0.577178	no therapeutic
Colonic Neoplasms	151	3	alpha-pinene	2.45254	1.66667	1.35061	1.86145	no therapeutic
Colonic Neoplasms	151	1	camphene	2.12583	1	-0.513629	-0.333608	no therapeutic
Colonic Neoplasms	151	8	cyclohexane	2.26904	1.375	-2.37768	-0.432493	no therapeutic
Colonic Neoplasms	151	6	folinic acid	2.50552	1.83333	-0.885495	0.984673	no therapeutic
Colonic Neoplasms	151	26	indole	2.53031	1.57692	-0.404744	0.269047	no therapeutic
Colonic Neoplasms	151	2	isoquercitrin	2.41391	1.5	0.434184	0.508323	no therapeutic
Colonic Neoplasms	151	9	limonene	2.22001	1.33333	-1.67356	0.2405	no therapeutic
Colonic Neoplasms	151	73	stearic acid	2.28241	1.32877	-3.07759	-0.105922	no therapeutic
Colitis, Ulcerative	33	3	alpha-pinene	2.57576	2	1.74245	1.22372	no therapeutic
Colitis, Ulcerative	33	1	camphene	2.42424	2	1.1913	0.796233	no therapeutic
Colitis, Ulcerative	33	8	cyclohexane	2.43939	1.5	-0.933755	-2.1017	no therapeutic
Colitis, Ulcerative	33	6	folinic acid	2.72727	2.16667	0.674188	1.36317	no therapeutic
Colitis, Ulcerative	33	26	indole	2.6317	1.76923	0.540697	-1.11319	no therapeutic
Colitis, Ulcerative	33	2	isoquercitrin	2.57576	2	1.02772	0.815795	no therapeutic
Colitis, Ulcerative	33	9	limonene	2.33333	1.66667	-0.475879	0.240238	no therapeutic
Colitis, Ulcerative	33	73	stearic acid	2.43047	1.71233	0.0754698	-0.576716	no therapeutic
Cholestasis, Extrahepatic	18	3	alpha-pinene	2.66667	2.33333	0.354554	1.64038	no therapeutic
Cholestasis, Extrahepatic	18	1	camphene	2.38889	2	-0.811393	0.214535	no therapeutic
Cholestasis, Extrahepatic	18	8	cyclohexane	2.58333	2.125	-1.77763	0.265134	no therapeutic
Cholestasis, Extrahepatic	18	6	folinic acid	2.7963	2.16667	-0.728997	-0.192095	no therapeutic
Cholestasis, Extrahepatic	18	26	indole	2.82692	2.19231	-0.0463495	0.0719802	no therapeutic
Cholestasis, Extrahepatic	18	2	isoquercitrin	2.66667	2	0.0526175	-0.0837418	no therapeutic
Cholestasis, Extrahepatic	18	9	limonene	2.51852	2.22222	-1.11808	2.28019	no therapeutic
Cholestasis, Extrahepatic	18	73	stearic acid	2.60046	1.9589	-1.15152	-1.63263	no therapeutic
Diabetes Mellitus	1792	3	alpha-pinene	2.59394	1	0.742979	0.150417	no therapeutic
Diabetes Mellitus	1792	1	camphene	2.3231	0	-0.0607916	-2.46824	no therapeutic
Diabetes Mellitus	1792	8	cyclohexane	2.47503	0.75	-2.13085	-2.10976	no therapeutic
Diabetes Mellitus	1792	6	folinic acid	2.71456	1.16667	-0.610657	0.316112	no therapeutic
Diabetes Mellitus	1792	26	indole	2.70716	0.884615	-0.68678	-3.09492	no therapeutic
Diabetes Mellitus	1792	2	isoquercitrin	2.63504	0	0.963593	-3.45169	no therapeutic
Diabetes Mellitus	1792	9	limonene	2.39645	0.222222	-2.46076	-5.49248	no therapeutic
Diabetes Mellitus	1792	73	stearic acid	2.47405	0.561644	-3.28477	-8.8999	no therapeutic
Dermatitis, Contact	25	3	alpha-pinene	2.69333	2	1.82512	0.571587	no therapeutic
Dermatitis, Contact	25	1	camphene	2.52	2	0.711367	0.408486	no therapeutic
Dermatitis, Contact	25	8	cyclohexane	2.64	1.875	0.0227786	-0.976026	no therapeutic
Dermatitis, Contact	25	6	folinic acid	2.94	2.33333	1.72472	1.96626	no therapeutic
Dermatitis, Contact	25	26	indole	2.75385	1.96154	0.702322	-0.602833	no therapeutic
Dermatitis, Contact	25	2	isoquercitrin	2.66	2	0.776997	0.357425	no therapeutic
Dermatitis, Contact	25	9	limonene	2.51556	1.77778	0.416495	-0.33939	no therapeutic
Dermatitis, Contact	25	73	stearic acid	2.55288	1.86301	0.343189	-0.423837	no therapeutic
Diabetic Nephropathies	95	3	alpha-pinene	2.57895	1.33333	1.11653	-0.791201	no therapeutic
Diabetic Nephropathies	95	1	camphene	2.35789	0	0.076213	-2.80074	no therapeutic
Diabetic Nephropathies	95	8	cyclohexane	2.49737	1.5	-1.3611	-1.23207	no therapeutic
Diabetic Nephropathies	95	6	folinic acid	2.75263	1.66667	0.0675222	-1.20457	no therapeutic
Diabetic Nephropathies	95	26	indole	2.71903	1.69231	0.525858	-0.78395	no therapeutic
Diabetic Nephropathies	95	2	isoquercitrin	2.63158	2	0.867399	1.12442	no therapeutic
Diabetic Nephropathies	95	9	limonene	2.42807	1.33333	-0.495349	-1.28399	no therapeutic
Diabetic Nephropathies	95	73	stearic acid	2.48161	1.43836	-1.01331	-2.13706	no therapeutic
Depressive Disorder	172	3	alpha-pinene	2.59496	1.66667	1.15894	1.17231	no therapeutic
Depressive Disorder	172	1	camphene	2.33721	1	-0.159214	-0.510015	no therapeutic
Depressive Disorder	172	8	cyclohexane	2.46148	1	-1.96751	-3.44977	no therapeutic
Depressive Disorder	172	6	folinic acid	2.72578	1.66667	-0.356692	-0.508556	no therapeutic
Depressive Disorder	172	26	indole	2.68828	1.53846	-0.284988	-1.36496	no therapeutic
Depressive Disorder	172	2	isoquercitrin	2.59012	1.5	0.648653	0.127515	no therapeutic
Depressive Disorder	172	9	limonene	2.36563	1.22222	-1.8147	-1.34508	no therapeutic
Depressive Disorder	172	73	stearic acid	2.45843	1.23288	-2.67051	-3.64625	no therapeutic
Endometrial Neoplasms	102	3	alpha-pinene	2.40523	1.66667	1.29101	1.45075	no therapeutic
Endometrial Neoplasms	102	1	camphene	2.08824	1	-0.588885	-0.429923	no therapeutic
Endometrial Neoplasms	102	8	cyclohexane	2.23897	1.375	-2.34906	-0.740111	no therapeutic
Endometrial Neoplasms	102	6	folinic acid	2.47059	1.83333	-0.85747	0.752632	no therapeutic
Endometrial Neoplasms	102	26	indole	2.4868	1.57692	-0.3954	-0.165998	no therapeutic
Endometrial Neoplasms	102	2	isoquercitrin	2.36765	2	0.498186	1.98084	no therapeutic
Endometrial Neoplasms	102	9	limonene	2.17647	1.44444	-1.59365	0.754003	no therapeutic
Endometrial Neoplasms	102	73	stearic acid	2.24013	1.31507	-3.21046	-1.12999	no therapeutic
Eczema	2	3	alpha-pinene	2.5	2.33333	0.567973	0.517779	no therapeutic
Eczema	2	1	camphene	2	2	-0.726745	-0.186976	no therapeutic
Eczema	2	8	cyclohexane	2.1875	2.125	-1.96021	-1.30262	no therapeutic
Eczema	2	6	folinic acid	2.41667	2.33333	-1.4158	-0.814526	no therapeutic
Eczema	2	26	indole	2.53846	2.46154	-0.443014	0.214517	no therapeutic
Eczema	2	2	isoquercitrin	3	3	2.24163	2.56434	no therapeutic
Eczema	2	9	limonene	2.16667	2.11111	-1.3835	-0.701784	no therapeutic
Eczema	2	73	stearic acid	2.30137	2.20548	-0.957602	-0.563664	no therapeutic
Fatty Liver, Alcoholic	254	3	alpha-pinene	2.59974	1.33333	0.990805	0.0246737	no therapeutic
Fatty Liver, Alcoholic	254	1	camphene	2.30315	0	-0.62908	-2.63192	no therapeutic
Fatty Liver, Alcoholic	254	8	cyclohexane	2.47933	1.25	-2.06031	-1.46779	no therapeutic
Fatty Liver, Alcoholic	254	6	folinic acid	2.71588	1.66667	-0.720605	-0.218225	no therapeutic
Fatty Liver, Alcoholic	254	26	indole	2.7132	1.57692	-0.29388	-0.249027	no therapeutic
Fatty Liver, Alcoholic	254	2	isoquercitrin	2.64173	1	0.943159	-1.11537	no therapeutic
Fatty Liver, Alcoholic	254	9	limonene	2.39414	0.888889	-1.64786	-3.24848	no therapeutic
Fatty Liver, Alcoholic	254	73	stearic acid	2.47649	0.986301	-3.04901	-6.98695	no therapeutic
Gastrointestinal Neoplasms	108	3	alpha-pinene	2.44753	1.66667	1.22981	1.55208	no therapeutic
Gastrointestinal Neoplasms	108	1	camphene	2.13889	2	-0.514122	2.36236	no therapeutic
Gastrointestinal Neoplasms	108	8	cyclohexane	2.26968	1.375	-2.39879	-0.745287	no therapeutic
Gastrointestinal Neoplasms	108	26	indole	2.52279	1.65385	-0.603848	0.543032	no therapeutic
Gastrointestinal Neoplasms	108	2	isoquercitrin	2.40278	2	0.421641	1.99404	no therapeutic
Gastrointestinal Neoplasms	108	9	limonene	2.20885	1.44444	-1.72198	0.638834	no therapeutic
Gastrointestinal Neoplasms	108	73	stearic acid	2.27638	1.36986	-3.50389	-0.378969	no therapeutic
Gallbladder Neoplasms	67	3	alpha-pinene	2.40796	1.66667	1.19164	1.05543	no therapeutic
Gallbladder Neoplasms	67	1	camphene	2.10448	1	-0.460494	-0.543449	no therapeutic
Gallbladder Neoplasms	67	8	cyclohexane	2.2444	1.625	-2.11324	0.311618	no therapeutic
Gallbladder Neoplasms	67	26	indole	2.50402	1.73077	-0.0409752	0.669175	no therapeutic
Gallbladder Neoplasms	67	2	isoquercitrin	2.31343	2	-0.00889243	1.67025	no therapeutic
Gallbladder Neoplasms	67	9	limonene	2.18076	1.44444	-1.45467	0.244798	no therapeutic
Gallbladder Neoplasms	67	73	stearic acid	2.24658	1.43836	-2.64901	-0.302204	no therapeutic
Glioma	11	3	alpha-pinene	2.36364	2	1.43789	1.07059	no therapeutic
Glioma	11	1	camphene	2.09091	2	0.0841845	0.72736	no therapeutic
Glioma	11	8	cyclohexane	2.23864	2.125	-0.871939	1.66729	no therapeutic
Glioma	11	26	indole	2.47902	2.07692	0.885461	1.41673	no therapeutic
Glioma	11	2	isoquercitrin	2.31818	2	0.59711	0.780035	no therapeutic
Glioma	11	9	limonene	2.14141	1.77778	-0.45279	0.933159	no therapeutic
Glioma	11	73	stearic acid	2.22291	1.76712	-0.696823	-0.380429	no therapeutic
Breast Neoplasms	211	3	alpha-pinene	2.45814	1.33333	1.27683	0.495497	no therapeutic
Breast Neoplasms	211	1	camphene	2.1327	1	-0.613375	-0.209513	no therapeutic
Breast Neoplasms	211	8	cyclohexane	2.27666	1.125	-2.4495	-1.65685	no therapeutic
Breast Neoplasms	211	26	indole	2.53555	1.46154	-0.693237	-0.4387	no therapeutic
Breast Neoplasms	211	2	isoquercitrin	2.41706	0.5	0.379693	-2.60666	no therapeutic
Breast Neoplasms	211	73	stearic acid	2.29488	1.24658	-3.57041	-0.615435	no therapeutic
Hypercholesterolemia	13	3	alpha-pinene	2.61538	2	0.610306	-0.00529511	no therapeutic
Hypercholesterolemia	13	1	camphene	2.38462	2	-0.243728	0.252646	no therapeutic
Hypercholesterolemia	13	8	cyclohexane	2.49038	2	-1.69021	-0.749165	no therapeutic
Hypercholesterolemia	13	6	folinic acid	2.67949	2.16667	-1.02943	-0.102524	no therapeutic
Hypercholesterolemia	13	26	indole	2.74852	2.15385	0.0196464	-0.30724	no therapeutic
Hypercholesterolemia	13	2	isoquercitrin	2.76923	2	1.28509	-0.0584817	no therapeutic
Hypercholesterolemia	13	9	limonene	2.41026	1.77778	-1.29405	-1.57133	no therapeutic
Hypercholesterolemia	13	73	stearic acid	2.46786	1.76712	-1.95444	-5.83402	no therapeutic
Hodgkin Disease	201	3	alpha-pinene	2.47264	1.33333	0.941535	0.298273	no therapeutic
Hodgkin Disease	201	1	camphene	2.20896	1	-0.322225	-0.278543	no therapeutic
Hodgkin Disease	201	8	cyclohexane	2.3495	1	-2.1468	-2.5723	no therapeutic
Hodgkin Disease	201	26	indole	2.5752	1.34615	-0.505284	-2.09505	no therapeutic
Hodgkin Disease	201	2	isoquercitrin	2.47264	1	0.597521	-0.936587	no therapeutic
Hodgkin Disease	201	9	limonene	2.27363	1	-1.50799	-2.18062	no therapeutic
Hodgkin Disease	201	73	stearic acid	2.33804	1.17808	-3.11627	-2.49597	no therapeutic
Hypertriglyceridemia	4	3	alpha-pinene	2.75	2.33333	1.06701	0.485692	no therapeutic
Hypertriglyceridemia	4	1	camphene	2.5	2	0.0855205	-0.251573	no therapeutic
Hypertriglyceridemia	4	8	cyclohexane	2.71875	2	0.242512	-2.20348	no therapeutic
Hypertriglyceridemia	4	6	folinic acid	2.91667	2.33333	0.741219	-0.829875	no therapeutic
Hypertriglyceridemia	4	26	indole	2.91346	2.46154	1.45405	0.191576	no therapeutic
Hypertriglyceridemia	4	2	isoquercitrin	2.875	2.5	1.31635	0.887109	no therapeutic
Hypertriglyceridemia	4	9	limonene	2.66667	2.22222	1.09505	0.0928641	no therapeutic
Hypertriglyceridemia	4	73	stearic acid	2.67123	2.16438	0.713204	-1.41036	no therapeutic
Hypertension	43	3	alpha-pinene	2.63566	1.66667	1.11071	-0.319845	no therapeutic
Hypertension	43	1	camphene	2.4186	2	0.206352	0.656213	no therapeutic
Hypertension	43	8	cyclohexane	2.52616	2	-1.52334	0.842984	no therapeutic
Hypertension	43	6	folinic acid	2.72868	1.66667	-0.581401	-2.23675	no therapeutic
Hypertension	43	26	indole	2.72809	1.84615	-0.1709	-0.91292	no therapeutic
Hypertension	43	2	isoquercitrin	2.61628	2	0.428256	0.698795	no therapeutic
Hypertension	43	9	limonene	2.43411	1.22222	-1.03907	-3.3965	no therapeutic
Hypertension	43	73	stearic acid	2.51131	1.76712	-1.49722	-0.139503	no therapeutic
Hyperlipidemias	5	3	alpha-pinene	2.53333	2.33333	0.398665	1.16147	no therapeutic
Hyperlipidemias	5	1	camphene	2.2	2	-0.678573	-0.0127931	no therapeutic
Hyperlipidemias	5	8	cyclohexane	2.4	2.125	-1.70116	-0.704578	no therapeutic
Hyperlipidemias	5	6	folinic acid	2.46667	2.16667	-2.01519	-1.0433	no therapeutic
Hyperlipidemias	5	26	indole	2.73846	2.5	0.408679	1.92669	no therapeutic
Hyperlipidemias	5	2	isoquercitrin	3	2.5	2.60645	1.53137	no therapeutic
Hyperlipidemias	5	9	limonene	2.31111	1.88889	-1.39443	-1.7222	no therapeutic
Hyperlipidemias	5	73	stearic acid	2.36164	1.9863	-2.01163	-3.55297	no therapeutic
Hyperglycemia	4	3	alpha-pinene	2.66667	2.33333	0.234042	0.46799	no therapeutic
Hyperglycemia	4	1	camphene	2.75	2	0.775034	-0.289864	no therapeutic
Hyperglycemia	4	8	cyclohexane	2.75	2.125	0.0121731	-1.28684	no therapeutic
Hyperglycemia	4	6	folinic acid	3.04167	2.66667	1.27726	0.784965	no therapeutic
Hyperglycemia	4	26	indole	2.97115	2.53846	1.37269	0.801405	no therapeutic
Hyperglycemia	4	9	limonene	2.77778	2.44444	1.52066	1.64461	no therapeutic
Hyperglycemia	4	73	stearic acid	2.75	2.24658	0.939079	-0.191489	no therapeutic
Influenza, Human	33	3	alpha-pinene	2.54545	1.66667	1.34775	-0.205518	no therapeutic
Influenza, Human	33	1	camphene	2.33333	2	0.481447	0.665584	no therapeutic
Influenza, Human	33	8	cyclohexane	2.43939	1.375	-1.08635	-3.1274	no therapeutic
Influenza, Human	33	6	folinic acid	2.71212	2.16667	0.418373	1.27568	no therapeutic
Influenza, Human	33	26	indole	2.62937	2.03846	0.301337	1.3608	no therapeutic
Influenza, Human	33	9	limonene	2.38384	1.88889	0.128422	1.61693	no therapeutic
Influenza, Human	33	73	stearic acid	2.40473	1.67123	-0.871066	-1.46619	no therapeutic
Intestinal Neoplasms	173	3	alpha-pinene	2.50096	1.33333	1.27209	0.261671	no therapeutic
Intestinal Neoplasms	173	1	camphene	2.19075	1	-0.508713	-0.337094	no therapeutic
Intestinal Neoplasms	173	8	cyclohexane	2.32009	1.125	-2.41971	-1.95834	no therapeutic
Intestinal Neoplasms	173	26	indole	2.57203	1.5	-0.605854	-0.549751	no therapeutic
Intestinal Neoplasms	173	2	isoquercitrin	2.49133	1.5	0.657521	0.54905	no therapeutic
Intestinal Neoplasms	173	9	limonene	2.26718	1.33333	-1.71196	0.160795	no therapeutic
Intestinal Neoplasms	173	73	stearic acid	2.33067	1.27397	-3.46578	-1.01586	no therapeutic
Keratosis, Actinic	12	3	alpha-pinene	2.36111	1.66667	-0.576822	-1.25069	no therapeutic
Keratosis, Actinic	12	1	camphene	2.08333	2	-1.42428	0.416828	no therapeutic
Keratosis, Actinic	12	8	cyclohexane	2.28125	1.875	-3.00251	-1.15297	no therapeutic
Keratosis, Actinic	12	6	folinic acid	2.48611	2.16667	-1.80483	0.567319	no therapeutic
Keratosis, Actinic	12	26	indole	2.58013	2.07692	-0.874038	-0.0273903	no therapeutic
Keratosis, Actinic	12	2	isoquercitrin	2.625	2	1.19458	0.386994	no therapeutic
Keratosis, Actinic	12	9	limonene	2.25926	2	-1.94387	1.30879	no therapeutic
Keratosis, Actinic	12	73	stearic acid	2.31849	1.78082	-2.61731	-2.17903	no therapeutic
Leukemia, Myelogenous, Chronic,	403	3	alpha-pinene	2.47312	1	0.913234	-0.778899	no therapeutic
Leukemia, Myelogenous, Chronic,	403	1	camphene	2.2134	1	-0.208657	0.0548546	no therapeutic
Leukemia, Myelogenous, Chronic,	403	8	cyclohexane	2.3384	1	-2.02329	-1.73542	no therapeutic
Leukemia, Myelogenous, Chronic,	403	6	folinic acid	2.58561	1.5	-0.677682	0.262266	no therapeutic
Leukemia, Myelogenous, Chronic,	403	26	indole	2.56948	1.34615	-0.421804	-0.475382	no therapeutic
Leukemia, Myelogenous, Chronic,	403	2	isoquercitrin	2.41439	0.5	0.207509	-2.46519	no therapeutic
Leukemia, Myelogenous, Chronic,	403	9	limonene	2.25669	1	-1.7225	-1.01189	no therapeutic
Leukemia, Myelogenous, Chronic,	403	73	stearic acid	2.33166	1.08219	-3.23341	-2.21478	no therapeutic
Liver Cirrhosis	111	3	alpha-pinene	2.57057	1.66667	0.766908	0.587684	no therapeutic
Liver Cirrhosis	111	1	camphene	2.26126	0	-0.761088	-2.77271	no therapeutic
Liver Cirrhosis	111	8	cyclohexane	2.43356	1.375	-2.45309	-1.79963	no therapeutic
Liver Cirrhosis	111	6	folinic acid	2.6967	1.66667	-0.751346	-1.16141	no therapeutic
Liver Cirrhosis	111	26	indole	2.68988	1.73077	-0.487499	-0.234001	no therapeutic
Liver Cirrhosis	111	2	isoquercitrin	2.62613	2	0.701101	1.20372	no therapeutic
Liver Cirrhosis	111	73	stearic acid	2.45576	1.32877	-2.76641	-3.7969	no therapeutic
Lymphoma	39	3	alpha-pinene	2.47863	2	1.40064	1.54492	no therapeutic
Lymphoma	39	1	camphene	2.23077	2	0.158019	0.979718	no therapeutic
Lymphoma	39	8	cyclohexane	2.35577	1.625	-1.38794	-0.80418	no therapeutic
Lymphoma	39	26	indole	2.56706	1.88462	0.225983	0.7611	no therapeutic
Lymphoma	39	2	isoquercitrin	2.4359	2	0.468412	1.06837	no therapeutic
Lymphoma	39	9	limonene	2.2735	1.44444	-0.888583	-0.915604	no therapeutic
Lymphoma	39	73	stearic acid	2.33685	1.69863	-1.28926	0.377427	no therapeutic
Lung Neoplasms	240	3	alpha-pinene	2.46944	1.33333	1.17806	0.565102	no therapeutic
Lung Neoplasms	240	1	camphene	2.14583	1	-0.621172	-0.0130323	no therapeutic
Lung Neoplasms	240	8	cyclohexane	2.3026	1.125	-2.39358	-1.35206	no therapeutic
Lung Neoplasms	240	26	indole	2.55817	1.46154	-0.567758	-0.048316	no therapeutic
Lung Neoplasms	240	2	isoquercitrin	2.4375	1	0.387216	-0.825134	no therapeutic
Lung Neoplasms	240	73	stearic acid	2.31592	1.21918	-3.21088	-0.590543	no therapeutic
Liver Neoplasms	181	3	alpha-pinene	2.4825	1	1.02063	-1.24491	no therapeutic
Liver Neoplasms	181	1	camphene	2.1989	1	-0.44747	-0.275987	no therapeutic
Liver Neoplasms	181	8	cyclohexane	2.31561	1	-2.55384	-2.61367	no therapeutic
Liver Neoplasms	181	26	indole	2.57544	1.46154	-0.576223	-0.895321	no therapeutic
Liver Neoplasms	181	2	isoquercitrin	2.48343	1.5	0.649263	0.645628	no therapeutic
Liver Neoplasms	181	73	stearic acid	2.33142	1.17808	-3.34629	-2.44972	no therapeutic
Mammary Neoplasms, Animal	138	3	alpha-pinene	2.40821	1.33333	1.14348	0.257276	no therapeutic
Mammary Neoplasms, Animal	138	1	camphene	2.0942	1	-0.556147	-0.322749	no therapeutic
Mammary Neoplasms, Animal	138	8	cyclohexane	2.24638	1.375	-2.43719	-0.359295	no therapeutic
Mammary Neoplasms, Animal	138	6	folinic acid	2.48551	1.83333	-0.798144	1.04054	no therapeutic
Mammary Neoplasms, Animal	138	26	indole	2.5	1.53846	-0.410341	-0.101139	no therapeutic
Mammary Neoplasms, Animal	138	2	isoquercitrin	2.37681	1.5	0.368218	0.560698	no therapeutic
Mammary Neoplasms, Animal	138	73	stearic acid	2.24945	1.26027	-3.39988	-1.23677	no therapeutic
Malaria, Falciparum	23	3	alpha-pinene	2.5942	2	0.976306	0.38955	no therapeutic
Malaria, Falciparum	23	1	camphene	2.3913	2	0.11272	0.369274	no therapeutic
Malaria, Falciparum	23	8	cyclohexane	2.55435	2	-0.728142	-0.0351803	no therapeutic
Malaria, Falciparum	23	26	indole	2.7408	1.84615	0.583986	-3.13531	no therapeutic
Malaria, Falciparum	23	2	isoquercitrin	2.71739	2	1.16919	0.240545	no therapeutic
Malaria, Falciparum	23	9	limonene	2.45894	1.55556	-0.181298	-2.64168	no therapeutic
Malaria, Falciparum	23	73	stearic acid	2.55509	1.82192	0.682998	-2.55758	no therapeutic
Medulloblastoma	8	3	alpha-pinene	2.375	2	0.681188	0.510363	no therapeutic
Medulloblastoma	8	1	camphene	2.125	2	-0.258195	0.465344	no therapeutic
Medulloblastoma	8	8	cyclohexane	2.32812	2.125	-0.883015	1.13862	no therapeutic
Medulloblastoma	8	26	indole	2.48558	2.11538	-0.205421	1.00912	no therapeutic
Medulloblastoma	8	2	isoquercitrin	2.4375	2	0.660483	0.334271	no therapeutic
Medulloblastoma	8	9	limonene	2.09722	1.66667	-2.10328	-1.00597	no therapeutic
Medulloblastoma	8	73	stearic acid	2.28082	1.86301	-0.79622	-0.345875	no therapeutic
Myocardial Infarction	54	3	alpha-pinene	2.59877	1.66667	0.835047	-0.463714	no therapeutic
Myocardial Infarction	54	1	camphene	2.38889	2	-0.0155997	0.588128	no therapeutic
Myocardial Infarction	54	8	cyclohexane	2.46528	1.375	-2.28432	-3.89919	no therapeutic
Myocardial Infarction	54	6	folinic acid	2.73148	1.83333	-0.468472	-1.01562	no therapeutic
Myocardial Infarction	54	26	indole	2.71652	1.80769	-0.225227	-1.76019	no therapeutic
Myocardial Infarction	54	2	isoquercitrin	2.72222	2	1.34637	0.637867	no therapeutic
Myocardial Infarction	54	9	limonene	2.4177	1.55556	-1.23381	-1.20928	no therapeutic
Myocardial Infarction	54	73	stearic acid	2.46702	1.52055	-2.47108	-4.59238	no therapeutic
Melanosis	1	3	alpha-pinene	2	2	-0.172789	-0.172789	no therapeutic
Melanosis	1	1	camphene	2	2	0.0581361	0.0581361	no therapeutic
Melanosis	1	8	cyclohexane	2.125	2.125	-0.314249	-0.314249	no therapeutic
Melanosis	1	6	folinic acid	2.16667	2.16667	-0.659874	-0.659874	no therapeutic
Melanosis	1	26	indole	2.19231	2.19231	-0.940342	-0.940342	no therapeutic
Melanosis	1	2	isoquercitrin	2	2	-0.203279	-0.203279	no therapeutic
Melanosis	1	9	limonene	1.88889	1.88889	-1.01164	-1.01164	no therapeutic
Melanosis	1	73	stearic acid	2.10959	2.10959	0.611211	0.611211	no therapeutic
Melanoma	37	3	alpha-pinene	2.45045	1.33333	0.438932	-0.970802	no therapeutic
Melanoma	37	1	camphene	2.21622	2	-0.539447	0.956927	no therapeutic
Melanoma	37	8	cyclohexane	2.34797	1.75	-2.25628	-0.0359808	no therapeutic
Melanoma	37	6	folinic acid	2.55856	2	-1.05174	0.655656	no therapeutic
Melanoma	37	26	indole	2.60083	1.80769	-0.379792	-0.111875	no therapeutic
Melanoma	37	2	isoquercitrin	2.48649	2	0.379909	0.979892	no therapeutic
Melanoma	37	9	limonene	2.26426	1.55556	-1.83504	-0.0916117	no therapeutic
Melanoma	37	73	stearic acid	2.34839	1.65753	-2.6404	0.00279621	no therapeutic
Melanoma, Experimental	61	3	alpha-pinene	2.43169	1.33333	0.632491	-0.563115	no therapeutic
Melanoma, Experimental	61	1	camphene	2.21311	2	-0.1305	1.3568	no therapeutic
Melanoma, Experimental	61	8	cyclohexane	2.33197	1.5	-2.09947	-0.94487	no therapeutic
Melanoma, Experimental	61	6	folinic acid	2.54918	1.83333	-0.838363	0.0037763	no therapeutic
Melanoma, Experimental	61	26	indole	2.57125	1.69231	-0.24051	-0.40944	no therapeutic
Melanoma, Experimental	61	2	isoquercitrin	2.44262	2	0.371975	1.38724	no therapeutic
Melanoma, Experimental	61	9	limonene	2.26412	1.44444	-1.34882	-0.284496	no therapeutic
Melanoma, Experimental	61	73	stearic acid	2.31799	1.56164	-2.63589	0.469929	no therapeutic
Nasopharyngeal Neoplasms	57	3	alpha-pinene	2.33333	1.66667	1.237	1.09881	no therapeutic
Nasopharyngeal Neoplasms	57	1	camphene	2.05263	2	-0.209847	1.96928	no therapeutic
Nasopharyngeal Neoplasms	57	8	cyclohexane	2.17982	1.5	-2.1491	-0.311187	no therapeutic
Nasopharyngeal Neoplasms	57	6	folinic acid	2.38889	1.83333	-0.909004	0.493605	no therapeutic
Nasopharyngeal Neoplasms	57	26	indole	2.4278	1.73077	-0.0155199	0.918759	no therapeutic
Nasopharyngeal Neoplasms	57	2	isoquercitrin	2.20175	2	-0.309542	1.73783	no therapeutic
Nasopharyngeal Neoplasms	57	9	limonene	2.10526	1.44444	-1.42752	0.394342	no therapeutic
Nasopharyngeal Neoplasms	57	73	stearic acid	2.17111	1.42466	-3.04267	-0.470933	no therapeutic
Neoplasms, Mesothelial	40	3	alpha-pinene	2.31667	1.66667	1.19274	0.789662	no therapeutic
Neoplasms, Mesothelial	40	1	camphene	2.025	2	-0.404524	1.42812	no therapeutic
Neoplasms, Mesothelial	40	8	cyclohexane	2.15	1.75	-2.11301	0.659204	no therapeutic
Neoplasms, Mesothelial	40	6	folinic acid	2.35833	1.83333	-1.03766	0.10778	no therapeutic
Neoplasms, Mesothelial	40	26	indole	2.39712	1.80769	-0.430113	0.984376	no therapeutic
Neoplasms, Mesothelial	40	2	isoquercitrin	2.2	2	-0.221995	1.3741	no therapeutic
Neoplasms, Mesothelial	40	73	stearic acid	2.14726	1.54795	-3.19591	0.230972	no therapeutic
Non-alcoholic Fatty Liver Disea	351	3	alpha-pinene	2.54986	1	0.84412	-1.11277	no therapeutic
Non-alcoholic Fatty Liver Disea	351	1	camphene	2.2849	0	-0.46833	-3.5279	no therapeutic
Non-alcoholic Fatty Liver Disea	351	8	cyclohexane	2.42984	1	-2.21992	-2.18821	no therapeutic
Non-alcoholic Fatty Liver Disea	351	6	folinic acid	2.67901	1.66667	-0.577943	0.638277	no therapeutic
Non-alcoholic Fatty Liver Disea	351	26	indole	2.67521	1.19231	-0.279201	-2.96834	no therapeutic
Non-alcoholic Fatty Liver Disea	351	2	isoquercitrin	2.59829	1	0.877389	-0.696631	no therapeutic
Non-alcoholic Fatty Liver Disea	351	9	limonene	2.36942	0.777778	-1.30887	-3.20195	no therapeutic
Non-alcoholic Fatty Liver Disea	351	73	stearic acid	2.42907	0.821918	-3.34534	-8.72858	no therapeutic
Osteosarcoma	6	3	alpha-pinene	2.38889	2	1.59419	0.861286	no therapeutic
Osteosarcoma	6	1	camphene	2	2	-0.401498	0.6298	no therapeutic
Osteosarcoma	6	8	cyclohexane	2.1875	2	-1.14865	0.50019	no therapeutic
Osteosarcoma	6	26	indole	2.40385	2.15385	-0.277347	1.27875	no therapeutic
Osteosarcoma	6	2	isoquercitrin	2.25	2	0.18612	0.608784	no therapeutic
Osteosarcoma	6	9	limonene	2.12963	1.88889	-0.563465	0.888205	no therapeutic
Osteosarcoma	6	73	stearic acid	2.14612	1.90411	-1.7302	0.293404	no therapeutic
Parotid Neoplasms	41	3	alpha-pinene	2.30081	1.66667	1.2483	0.909466	no therapeutic
Parotid Neoplasms	41	1	camphene	2	1	-0.450752	-0.665584	no therapeutic
Parotid Neoplasms	41	8	cyclohexane	2.15549	1.625	-1.73536	0.0874656	no therapeutic
Parotid Neoplasms	41	26	indole	2.39962	1.76923	0.0954758	0.749478	no therapeutic
Parotid Neoplasms	41	2	isoquercitrin	2.15854	2	-0.327634	1.50866	no therapeutic
Parotid Neoplasms	41	9	limonene	2.07859	1.44444	-1.24044	-0.00865075	no therapeutic
Parotid Neoplasms	41	73	stearic acid	2.13632	1.46575	-3.03197	-0.705168	no therapeutic
Pancreatic Neoplasms	161	3	alpha-pinene	2.49482	1.33333	1.11409	0.240502	no therapeutic
Pancreatic Neoplasms	161	1	camphene	2.22981	1	-0.271663	-0.365769	no therapeutic
Pancreatic Neoplasms	161	8	cyclohexane	2.35404	1.125	-2.08582	-1.89724	no therapeutic
Pancreatic Neoplasms	161	26	indole	2.60105	1.57692	-0.269291	0.128484	no therapeutic
Pancreatic Neoplasms	161	2	isoquercitrin	2.47826	1.5	0.441249	0.487875	no therapeutic
Pancreatic Neoplasms	161	73	stearic acid	2.35753	1.31507	-2.96213	-0.554256	no therapeutic
Paresis	1	3	alpha-pinene	2.33333	2.33333	-0.307305	-0.307305	no therapeutic
Paresis	1	1	camphene	2	2	-0.656392	-0.656392	no therapeutic
Paresis	1	8	cyclohexane	2.375	2.375	-0.857462	-0.857462	no therapeutic
Paresis	1	26	indole	2.65385	2.65385	0.0900119	0.0900119	no therapeutic
Paresis	1	2	isoquercitrin	2.5	2.5	0.0537628	0.0537628	no therapeutic
Paresis	1	9	limonene	2.22222	2.22222	-0.954211	-0.954211	no therapeutic
Paresis	1	73	stearic acid	2.38356	2.38356	-0.535932	-0.535932	no therapeutic
Psoriasis	9	3	alpha-pinene	2.81481	2.33333	1.33481	1.28739	no therapeutic
Psoriasis	9	1	camphene	2.44444	2	-0.465113	0.14177	no therapeutic
Psoriasis	9	8	cyclohexane	2.59722	2	-1.48632	-1.25779	no therapeutic
Psoriasis	9	6	folinic acid	2.83333	2.16667	-0.437259	-0.745937	no therapeutic
Psoriasis	9	26	indole	2.80342	2.19231	-0.305672	-0.941373	no therapeutic
Psoriasis	9	2	isoquercitrin	2.77778	2	0.613446	-0.371288	no therapeutic
Psoriasis	9	9	limonene	2.5679	2.22222	-0.364272	1.43756	no therapeutic
Psoriasis	9	73	stearic acid	2.63623	2.06849	-0.213293	-0.548643	no therapeutic
Prostatic Neoplasms	157	3	alpha-pinene	2.46921	1.66667	1.23757	1.79801	no therapeutic
Prostatic Neoplasms	157	1	camphene	2.18471	1	-0.252852	-0.278543	no therapeutic
Prostatic Neoplasms	157	8	cyclohexane	2.30494	1.375	-2.14016	-0.344456	no therapeutic
Prostatic Neoplasms	157	6	folinic acid	2.5414	1.83333	-0.77694	1.02155	no therapeutic
Prostatic Neoplasms	157	26	indole	2.55047	1.57692	-0.56718	0.301981	no therapeutic
Prostatic Neoplasms	157	2	isoquercitrin	2.44586	2	0.526853	2.28535	no therapeutic
Prostatic Neoplasms	157	73	stearic acid	2.30329	1.24658	-3.27938	-1.45414	no therapeutic
Precursor Cell Lymphoblastic Le	649	3	alpha-pinene	2.47458	1	0.863896	-0.367349	no therapeutic
Precursor Cell Lymphoblastic Le	649	1	camphene	2.21109	1	-0.233071	0.219709	no therapeutic
Precursor Cell Lymphoblastic Le	649	8	cyclohexane	2.34996	1	-2.12173	-1.24997	no therapeutic
Precursor Cell Lymphoblastic Le	649	26	indole	2.58214	1.15385	-0.656272	-1.89849	no therapeutic
Precursor Cell Lymphoblastic Le	649	2	isoquercitrin	2.45223	0.5	0.515484	-2.46387	no therapeutic
Precursor Cell Lymphoblastic Le	649	9	limonene	2.27187	0.555556	-1.71595	-3.72867	no therapeutic
Precursor Cell Lymphoblastic Le	649	73	stearic acid	2.3443	1.0137	-3.68104	-2.37291	no therapeutic
Pilonidal Sinus	1	3	alpha-pinene	2	2	-0.944423	-0.944423	no therapeutic
Pilonidal Sinus	1	1	camphene	2	2	-0.249728	-0.249728	no therapeutic
Pilonidal Sinus	1	8	cyclohexane	2.25	2.25	-0.583964	-0.583964	no therapeutic
Pilonidal Sinus	1	6	folinic acid	2.5	2.5	0.0123101	0.0123101	no therapeutic
Pilonidal Sinus	1	26	indole	2.46154	2.46154	-0.00688374	-0.00688374	no therapeutic
Pilonidal Sinus	1	2	isoquercitrin	2.5	2.5	0.83147	0.83147	no therapeutic
Pilonidal Sinus	1	9	limonene	2.11111	2.11111	-0.805796	-0.805796	no therapeutic
Pilonidal Sinus	1	73	stearic acid	2.21918	2.21918	-0.551928	-0.551928	no therapeutic
Polycystic Ovary Syndrome	391	3	alpha-pinene	2.5584	1	1.14732	-0.967217	no therapeutic
Polycystic Ovary Syndrome	391	1	camphene	2.289	0	-0.197624	-4.0511	no therapeutic
Polycystic Ovary Syndrome	391	8	cyclohexane	2.43063	1.125	-1.71847	-1.19372	no therapeutic
Polycystic Ovary Syndrome	391	6	folinic acid	2.65857	1.33333	-0.631198	-0.981015	no therapeutic
Polycystic Ovary Syndrome	391	26	indole	2.65296	1.30769	-0.143156	-1.67922	no therapeutic
Polycystic Ovary Syndrome	391	2	isoquercitrin	2.60102	1.5	1.00188	0.974097	no therapeutic
Polycystic Ovary Syndrome	391	9	limonene	2.33987	0.666667	-1.54549	-3.95269	no therapeutic
Polycystic Ovary Syndrome	391	73	stearic acid	2.42	1.0411	-2.82558	-3.97335	no therapeutic
Schizophrenia	22	3	alpha-pinene	2.86364	2	1.7978	0.240621	no therapeutic
Schizophrenia	22	1	camphene	2.72727	2	1.17381	0.358703	no therapeutic
Schizophrenia	22	8	cyclohexane	2.77841	2	0.0767019	-0.339473	no therapeutic
Schizophrenia	22	6	folinic acid	3.04545	2.16667	1.23692	0.367263	no therapeutic
Schizophrenia	22	26	indole	2.95629	2	1.42516	-1.36438	no therapeutic
Schizophrenia	22	2	isoquercitrin	2.86364	2	1.19944	0.207461	no therapeutic
Schizophrenia	22	9	limonene	2.65657	1.88889	0.359425	0.101533	no therapeutic
Schizophrenia	22	73	stearic acid	2.74782	1.93151	1.17689	-0.581229	no therapeutic
Seizures	67	3	alpha-pinene	2.64179	2	0.814503	0.792619	no therapeutic
Seizures	67	1	camphene	2.41791	2	-0.205449	0.541552	no therapeutic
Seizures	67	8	cyclohexane	2.53545	1.75	-1.86131	-1.2883	no therapeutic
Seizures	67	26	indole	2.79047	1.96154	0.465667	0.0317865	no therapeutic
Seizures	67	2	isoquercitrin	2.73881	2	1.16599	0.564239	no therapeutic
Seizures	67	9	limonene	2.45771	1.66667	-1.31459	-0.463443	no therapeutic
Seizures	67	73	stearic acid	2.55101	1.82192	-1.22091	0.162028	no therapeutic
Stroke	20	3	alpha-pinene	2.6	2	0.512645	0.0201208	no therapeutic
Stroke	20	1	camphene	2.35	2	-0.448753	0.296883	no therapeutic
Stroke	20	8	cyclohexane	2.4875	1.75	-2.01567	-2.50871	no therapeutic
Stroke	20	6	folinic acid	2.74167	2.16667	-0.57716	0.180972	no therapeutic
Stroke	20	26	indole	2.75577	2.19231	0.157126	0.753666	no therapeutic
Stroke	20	2	isoquercitrin	2.8	2	1.47388	0.130641	no therapeutic
Stroke	20	9	limonene	2.37778	1.55556	-1.85436	-2.99881	no therapeutic
Stroke	20	73	stearic acid	2.50685	1.82192	-1.243	-3.9907	no therapeutic
Stomach Ulcer	45	3	alpha-pinene	2.53333	2	1.33429	1.61878	no therapeutic
Stomach Ulcer	45	1	camphene	2.26667	2	0.080208	1.04292	no therapeutic
Stomach Ulcer	45	8	cyclohexane	2.375	2	-1.8046	1.66996	no therapeutic
Stomach Ulcer	45	6	folinic acid	2.6037	1.83333	-0.604861	-0.378546	no therapeutic
Stomach Ulcer	45	26	indole	2.59402	1.84615	-0.418604	0.496299	no therapeutic
Stomach Ulcer	45	2	isoquercitrin	2.58889	2	1.20016	1.07092	no therapeutic
Stomach Ulcer	45	73	stearic acid	2.37656	1.63014	-1.73456	-0.17872	no therapeutic
Stomach Neoplasms	116	3	alpha-pinene	2.42816	1.33333	1.25878	0.0512078	no therapeutic
Stomach Neoplasms	116	1	camphene	2.10345	1	-0.52991	-0.400116	no therapeutic
Stomach Neoplasms	116	8	cyclohexane	2.24892	1.375	-2.32317	-0.68384	no therapeutic
Stomach Neoplasms	116	26	indole	2.50365	1.57692	-0.541924	-0.135496	no therapeutic
Stomach Neoplasms	116	2	isoquercitrin	2.37931	1.5	0.432642	0.402047	no therapeutic
Stomach Neoplasms	116	73	stearic acid	2.25685	1.36986	-3.43045	-0.159022	no therapeutic
Squamous Cell Carcinoma of Head	1391	3	alpha-pinene	2.50707	1	1.16082	0.376095	no therapeutic
Squamous Cell Carcinoma of Head	1391	1	camphene	2.22502	0	-0.116465	-2.13437	no therapeutic
Squamous Cell Carcinoma of Head	1391	8	cyclohexane	2.36583	0.875	-2.58699	-1.52548	no therapeutic
Squamous Cell Carcinoma of Head	1391	26	indole	2.61201	1.07692	-1.21966	-1.42006	no therapeutic
Squamous Cell Carcinoma of Head	1391	2	isoquercitrin	2.50935	0.5	0.855888	-1.84061	no therapeutic
Squamous Cell Carcinoma of Head	1391	9	limonene	2.29907	0.555556	-2.33578	-3.16437	no therapeutic
Squamous Cell Carcinoma of Head	1391	73	stearic acid	2.37136	0.794521	-4.56276	-4.94777	no therapeutic
Soft Tissue Neoplasms	229	3	alpha-pinene	2.45852	1.33333	1.15231	0.520768	no therapeutic
Soft Tissue Neoplasms	229	1	camphene	2.15284	1	-0.376908	-0.184484	no therapeutic
Soft Tissue Neoplasms	229	8	cyclohexane	2.28275	1.125	-2.40295	-1.5883	no therapeutic
Soft Tissue Neoplasms	229	26	indole	2.54484	1.46154	-0.552321	-0.291385	no therapeutic
Soft Tissue Neoplasms	229	2	isoquercitrin	2.45197	1.5	0.592993	0.845693	no therapeutic
Soft Tissue Neoplasms	229	9	limonene	2.23532	1.22222	-1.7483	-0.15773	no therapeutic
Soft Tissue Neoplasms	229	73	stearic acid	2.29156	1.15068	-3.71869	-2.31079	no therapeutic
Skin Neoplasms	240	3	alpha-pinene	2.46944	1	1.02426	-1.09939	no therapeutic
Skin Neoplasms	240	1	camphene	2.17083	1	-0.494705	-0.109239	no therapeutic
Skin Neoplasms	240	8	cyclohexane	2.3125	1.125	-2.45073	-1.52887	no therapeutic
Skin Neoplasms	240	6	folinic acid	2.55486	1.83333	-0.966448	1.31865	no therapeutic
Skin Neoplasms	240	26	indole	2.57372	1.53846	-0.511266	0.582821	no therapeutic
Skin Neoplasms	240	2	isoquercitrin	2.50208	1.5	0.751307	0.876473	no therapeutic
Skin Neoplasms	240	73	stearic acid	2.32917	1.17808	-3.26086	-1.71715	no therapeutic
Sigmoid Neoplasms	55	3	alpha-pinene	2.35758	1.66667	1.39592	0.974462	no therapeutic
Sigmoid Neoplasms	55	1	camphene	2.05455	2	-0.266724	1.674	no therapeutic
Sigmoid Neoplasms	55	8	cyclohexane	2.17727	1.625	-2.1255	0.120409	no therapeutic
Sigmoid Neoplasms	55	26	indole	2.43147	1.76923	-0.268875	0.962695	no therapeutic
Sigmoid Neoplasms	55	2	isoquercitrin	2.23636	2	-0.105595	1.59211	no therapeutic
Sigmoid Neoplasms	55	9	limonene	2.11515	1.44444	-1.45199	0.165345	no therapeutic
Sigmoid Neoplasms	55	73	stearic acid	2.17584	1.45205	-3.02298	-0.308353	no therapeutic
Tinea Capitis	1	3	alpha-pinene	2.33333	2.33333	0.398379	0.398379	no therapeutic
Tinea Capitis	1	1	camphene	2	2	-0.256547	-0.256547	no therapeutic
Tinea Capitis	1	8	cyclohexane	2.875	2.875	2.92058	2.92058	no therapeutic
Tinea Capitis	1	6	folinic acid	3	3	2.0852	2.0852	no therapeutic
Tinea Capitis	1	26	indole	2.76923	2.76923	2.17629	2.17629	no therapeutic
Tinea Capitis	1	2	isoquercitrin	3	3	2.42479	2.42479	no therapeutic
Tinea Capitis	1	9	limonene	2.33333	2.33333	0.598385	0.598385	no therapeutic
Tinea Capitis	1	73	stearic acid	2.53425	2.53425	2.07803	2.07803	no therapeutic
Uterine Neoplasms	87	3	alpha-pinene	2.37165	1.33333	1.20118	-0.0191087	no therapeutic
Uterine Neoplasms	87	1	camphene	2.08046	1	-0.460771	-0.45897	no therapeutic
Uterine Neoplasms	87	8	cyclohexane	2.22557	1.625	-1.99309	0.768517	no therapeutic
Uterine Neoplasms	87	26	indole	2.46729	1.57692	-0.256024	-0.343653	no therapeutic
Uterine Neoplasms	87	2	isoquercitrin	2.3046	2	0.148716	1.96729	no therapeutic
Uterine Neoplasms	87	9	limonene	2.15964	1.44444	-1.34105	0.659708	no therapeutic
Uterine Neoplasms	87	73	stearic acid	2.21808	1.38356	-3.02112	-0.248624	no therapeutic
Urinary Bladder Neoplasms	228	3	alpha-pinene	2.49854	1	1.30259	-1.15967	no therapeutic
Urinary Bladder Neoplasms	228	1	camphene	2.19737	1	-0.314819	-0.17189	no therapeutic
Urinary Bladder Neoplasms	228	8	cyclohexane	2.33388	1.125	-2.10896	-1.51766	no therapeutic
Urinary Bladder Neoplasms	228	26	indole	2.58333	1.46154	-0.24427	-0.316243	no therapeutic
Urinary Bladder Neoplasms	228	2	isoquercitrin	2.49342	1	0.756005	-0.890865	no therapeutic
Urinary Bladder Neoplasms	228	9	limonene	2.28509	1.22222	-1.35176	-0.147638	no therapeutic
Urinary Bladder Neoplasms	228	73	stearic acid	2.33682	1.17808	-2.98755	-1.71607	no therapeutic
Vitiligo	2	3	alpha-pinene	2.83333	2.66667	1.3	1.21902	no therapeutic
Vitiligo	2	1	camphene	2	2	-1.2502	-0.506938	no therapeutic
Vitiligo	2	8	cyclohexane	2.5625	2.375	-0.660724	-0.526444	no therapeutic
Vitiligo	2	6	folinic acid	2.5	2.16667	-1.70793	-2.16079	no therapeutic
Vitiligo	2	26	indole	2.73077	2.5	-0.168808	-0.545408	no therapeutic
Vitiligo	2	2	isoquercitrin	2.75	2.5	0.537817	0.252933	no therapeutic
Vitiligo	2	9	limonene	2.5	2.22222	-0.158991	-0.682959	no therapeutic
Vitiligo	2	73	stearic acid	2.46575	2.21918	-0.697654	-1.3158	no therapeutic
Warts	1	3	alpha-pinene	2.33333	2.33333	0.775201	0.775201	no therapeutic
Warts	1	1	camphene	2	2	0.0900717	0.0900717	no therapeutic
Warts	1	8	cyclohexane	2.125	2.125	-0.841047	-0.841047	no therapeutic
Warts	1	6	folinic acid	2.5	2.5	0.134814	0.134814	no therapeutic
Warts	1	26	indole	2.42308	2.42308	0.185526	0.185526	no therapeutic
Warts	1	2	isoquercitrin	2	2	-0.704269	-0.704269	no therapeutic
Warts	1	9	limonene	2.11111	2.11111	-0.225637	-0.225637	no therapeutic
Warts	1	73	stearic acid	2.19178	2.19178	-0.229101	-0.229101	no therapeutic
